# Supplementary material
Source: publisher figshare collection journal article supplement (https://tandf.figshare.com/articles/dataset/_/1466823)
Supplement: Supplementary file 1 [file 4]

#### Supplementary File 6. Results of Rhyolite-MELTS modeling of the Bokan lamprophyres

The results presented in this file are the raw output data generated by Rhyolite-MELTS for fractional crystallization of a lamprophyric starting composition listed in Supplementary File 4. The relative oxidation state is fixed to the FMQ buffer, pressure of 1 kbar and initial water content of 3 wt%. The liquid compositions are the basis of the model curves presented in figure 9 of the text.

|                 |                                 |           |              |           |         |         |             |           |           |     |        |       |      |        |           |      |     |        |        |       |  |
|-----------------|---------------------------------|-----------|--------------|-----------|---------|---------|-------------|-----------|-----------|-----|--------|-------|------|--------|-----------|------|-----|--------|--------|-------|--|
| Model 828 Bokan |                                 |           |              |           |         |         |             |           |           |     |        |       |      |        |           |      |     |        |        |       |  |
| Temp (oC)       | =                               | 1080.47   |              |           |         |         |             |           |           |     |        |       |      |        |           |      |     |        |        |       |  |
| Constraint      | Flags:                          | fO2       | path         | =         | QFM     |         |             |           |           |     |        |       |      |        |           |      |     |        |        |       |  |
| Liquid          | mass                            | =         | 99.26        | (gm)      | density | =       | 2.38        | (gm/cc)   | viscosity | =   | 2.96   | (log  | 10   | poise) | (analysis | in   | wt  | %)     |        |       |  |
|                 | G                               | =         | -1632850.7   | (J)       | H       | =       | -1256979.74 | (J)       | S         | =   | 277.68 | (J/K) | V    | =      | 41.7      | (cc) | Cp  | =      | 143.94 | (J/K) |  |
|                 | SiO2                            | TiO2      | Al2O3        | Fe2O3     | Cr2O3   | FeO     | MnO         | MgO       | NiO       | CoO | CaO    | Na2O  | K2O  | P2O5   | H2O       | CO2  | SO3 | Cl2O-1 | F2O-1  |       |  |
|                 | 53.61                           | 0.58      | 19.47        | 1.24      | 0       | 5.9     | 0.22        | 2.61      | 0         | 0   | 8.78   | 3.13  | 1.22 | 0.21   | 3.02      | 0    | 0   | 0      | 0      |       |  |
| feldspar        | mass                            | =         | 0.09         | (gm)      | density | =       | 2.69        | (gm/cc)   | (analysis | in  | mole   | %)    |      |        |           |      |     |        |        |       |  |
|                 | K0.00Na0.14Ca0.85Al1.85Si2.15O8 |           |              |           |         |         |             |           |           |     |        |       |      |        |           |      |     |        |        |       |  |
|                 | G                               | =         | -1488.62     | (J)       | H       | =       | -1214.04    | (J)       | S         | =   | 0.2    | (J/K) | V    | =      | 0.03      | (cc) | Cp  | =      | 0.11   | (J/K) |  |
|                 | albite                          | anorthite | sanidine     |           |         |         |             |           |           |     |        |       |      |        |           |      |     |        |        |       |  |
|                 | 14.34                           | 85.39     | 0.28         |           |         |         |             |           |           |     |        |       |      |        |           |      |     |        |        |       |  |
| Total           | solids                          | mass      | =            | 0.09      | (gm)    | density | =           | 2.69      | (gm/cc)   |     |        |       |      |        |           |      |     |        |        |       |  |
|                 | G                               | =         | -1488.62     | (J)       | H       | =       | -1214.04    | (J)       | S         | =   | 0.2    | (J/K) | V    | =      | 0.03      | (cc) | Cp  | =      | 0.11   | (J/K) |  |
| Summary         | of                              | all       | fractionated | phases:   | (total  | mass    | =           | 0         | grams)    |     |        |       |      |        |           |      |     |        |        |       |  |
| Viscosity       | of                              | the       | System:      | 2.96      | (log    | 10      | poise)      |           |           |     |        |       |      |        |           |      |     |        |        |       |  |
| System          | mass                            | =         | 99.35        | (gm)      | density | =       | 2.38        | (gm/cc)   |           |     |        |       |      |        |           |      |     |        |        |       |  |
|                 | G                               | =         | -1634339.32  | (J)       | H       | =       | -1258193.78 | (J)       | S         | =   | 277.88 | (J/K) | V    | =      | 41.73     | (cc) | Cp  | =      | 144.05 | (J/K) |  |
| Oxygen          | delta                           | moles     | =            | -2.66E-07 | delta   | grams   | =           | -8.51E-06 |           |     |        |       |      |        |           |      |     |        |        |       |  |
|                 | G                               | =         | 0.08         | (J)       | H       | =       | -0.01       | (J)       | S         | =   | 0      | (J/K) | V    | =      | -0.03     | (cc) | Cp  | =      | 0      | (J/K) |  |

\*\*\*\*\*-----\*\*\*\*\*

|                 |                                 |           |              |         |         |             |             |         |           |     |        |       |      |        |           |      |     |        |        |       |  |
|-----------------|---------------------------------|-----------|--------------|---------|---------|-------------|-------------|---------|-----------|-----|--------|-------|------|--------|-----------|------|-----|--------|--------|-------|--|
| Model 828 Bokan |                                 |           |              |         |         |             |             |         |           |     |        |       |      |        |           |      |     |        |        |       |  |
| Temp (oC)       | =                               | 1075.47   | (C)          |         |         |             |             |         |           |     |        |       |      |        |           |      |     |        |        |       |  |
| Constraint      | Flags:                          | fO2       | path         | =       | QFM     | Fractionate | Solids      |         |           |     |        |       |      |        |           |      |     |        |        |       |  |
| Liquid          | mass                            | =         | 98.01        | (gm)    | density | =           | 2.38        | (gm/cc) | viscosity | =   | 2.97   | (log  | 10   | poise) | (analysis | in   | wt  | %)     |        |       |  |
|                 | G                               | =         | -1610170.21  | (J)     | H       | =           | -1240697.08 | (J)     | S         | =   | 273.96 | (J/K) | V    | =      | 41.19     | (cc) | Cp  | =      | 142.09 | (J/K) |  |
|                 | SiO2                            | TiO2      | Al2O3        | Fe2O3   | Cr2O3   | FeO         | MnO         | MgO     | NiO       | CoO | CaO    | Na2O  | K2O  | P2O5   | H2O       | CO2  | SO3 | Cl2O-1 | F2O-1  |       |  |
|                 | 53.7                            | 0.59      | 19.28        | 1.26    | 0       | 5.97        | 0.22        | 2.64    | 0         | 0   | 8.67   | 3.15  | 1.23 | 0.21   | 3.06      | 0    | 0   | 0      | 0      |       |  |
| feldspar        | mass                            | =         | 1.25         | (gm)    | density | =           | 2.69        | (gm/cc) | (analysis | in  | mole   | %)    |      |        |           |      |     |        |        |       |  |
|                 | K0.00Na0.15Ca0.85Al1.85Si2.15O8 |           |              |         |         |             |             |         |           |     |        |       |      |        |           |      |     |        |        |       |  |
|                 | G                               | =         | -21346.6     | (J)     | H       | =           | -17427.67   | (J)     | S         | =   | 2.91   | (J/K) | V    | =      | 0.46      | (cc) | Cp  | =      | 1.52   | (J/K) |  |
|                 | albite                          | anorthite | sanidine     |         |         |             |             |         |           |     |        |       |      |        |           |      |     |        |        |       |  |
|                 | 14.61                           | 85.1      | 0.28         |         |         |             |             |         |           |     |        |       |      |        |           |      |     |        |        |       |  |
| Total           | solids                          | mass      | =            | 1.25    | (gm)    | density     | =           | 2.69    | (gm/cc)   |     |        |       |      |        |           |      |     |        |        |       |  |
|                 | G                               | =         | -21346.6     | (J)     | H       | =           | -17427.67   | (J)     | S         | =   | 2.91   | (J/K) | V    | =      | 0.46      | (cc) | Cp  | =      | 1.52   | (J/K) |  |
| Summary         | of                              | all       | fractionated | phases: | (total  | mass        | =           | 0.08    | grams)    |     |        |       |      |        |           |      |     |        |        |       |  |
| feldspar        | mass                            | =         | 0.08         | (gm)    | density | =           | 2.69        | (gm/cc) | (analysis | in  | mole   | %)    |      |        |           |      |     |        |        |       |  |
|                 | K0.00Na0.14Ca0.85Al1.85Si2.15O8 |           |              |         |         |             |             |         |           |     |        |       |      |        |           |      |     |        |        |       |  |
|                 | G                               | =         | -1440.49     | (J)     | H       | =           | -1176.1     | (J)     | S         | =   | 0.2    | (J/K) | V    | =      | 0.03      | (cc) | Cp  | =      | 0.1    | (J/K) |  |
|                 | albite                          | anorthite | sanidine     |         |         |             |             |         |           |     |        |       |      |        |           |      |     |        |        |       |  |
|                 | 14.34                           | 85.39     | 0.28         |         |         |             |             |         |           |     |        |       |      |        |           |      |     |        |        |       |  |
| Viscosity       | of                              | the       | System:      | 2.99    | (log    | 10          | poise)      |         |           |     |        |       |      |        |           |      |     |        |        |       |  |
| System          | mass                            | =         | 99.35        | (gm)    | density | =           | 2.38        | (gm/cc) |           |     |        |       |      |        |           |      |     |        |        |       |  |
|                 | G                               | =         | -1632957.3   | (J)     | H       | =           | -1259300.86 | (J)     | S         | =   | 277.07 | (J/K) | V    | =      | 41.69     | (cc) | Cp  | =      | 143.71 | (J/K) |  |

|        |       |       |       |          |       |       |      |             |   |   |   |       |   |   |      |      |    |   |   |       |
|--------|-------|-------|-------|----------|-------|-------|------|-------------|---|---|---|-------|---|---|------|------|----|---|---|-------|
| Oxygen | delta | moles | =     | 9.63E-06 | delta | grams | =    | 0.000308033 |   |   |   |       |   |   |      |      |    |   |   |       |
|        | G     | =     | -2.96 | (J)      | H     | =     | 0.34 | (J)         | S | = | 0 | (J/K) | V | = | 1.08 | (cc) | Cp | = | 0 | (J/K) |

\*\*\*\*\*-----\*\*\*\*\*

Model 828 Bokan

|           |   |         |
|-----------|---|---------|
| Temp (oC) | = | 1070.47 |
|-----------|---|---------|

|            |        |      |             |       |         |             |             |         |           |     |        |       |      |        |           |      |     |        |        |
|------------|--------|------|-------------|-------|---------|-------------|-------------|---------|-----------|-----|--------|-------|------|--------|-----------|------|-----|--------|--------|
| Constraint | Flags: | fO2  | path        | =     | QFM     | Fractionate | Solids      |         |           |     |        |       |      |        |           |      |     |        |        |
| Liquid     | mass   | =    | 96.8        | (gm)  | density | =           | 2.38        | (gm/cc) | viscosity | =   | 2.98   | (log  | 10   | poise) | (analysis | in   | wt  | %)     |        |
|            | G      | =    | -1588106.11 | (J)   | H       | =           | -1224862.98 | (J)     | S         | =   | 270.35 | (J/K) | V    | =      | 40.7      | (cc) | Cp  | =      | 140.28 |
|            | SiO2   | TiO2 | Al2O3       | Fe2O3 | Cr2O3   | FeO         | MnO         | MgO     | NiO       | CoO | CaO    | Na2O  | K2O  | P2O5   | H2O       | CO2  | SO3 | Cl2O-1 | F2O-1  |
|            | 53.78  | 0.6  | 19.1        | 1.28  | 0       | 6.04        | 0.23        | 2.68    | 0         | 0   | 8.56   | 3.17  | 1.25 | 0.22   | 3.1       | 0    | 0   | 0      | 0      |

|          |                                 |           |           |      |         |   |           |         |           |    |      |       |   |   |      |      |    |   |      |
|----------|---------------------------------|-----------|-----------|------|---------|---|-----------|---------|-----------|----|------|-------|---|---|------|------|----|---|------|
| feldspar | mass                            | =         | 1.22      | (gm) | density | = | 2.69      | (gm/cc) | (analysis | in | mole | %)    |   |   |      |      |    |   |      |
|          | K0.00Na0.15Ca0.85Al1.85Si2.15O8 |           |           |      |         |   |           |         |           |    |      |       |   |   |      |      |    |   |      |
|          | G                               | =         | -20748.87 | (J)  | H       | = | -16957.64 | (J)     | S         | =  | 2.82 | (J/K) | V | = | 0.45 | (cc) | Cp | = | 1.48 |
|          | albite                          | anorthite | sanidine  |      |         |   |           |         |           |    |      |       |   |   |      |      |    |   |      |
|          | 14.9                            | 84.81     | 0.29      |      |         |   |           |         |           |    |      |       |   |   |      |      |    |   |      |

|       |        |      |           |      |      |         |           |      |         |   |      |       |   |   |      |      |    |   |      |
|-------|--------|------|-----------|------|------|---------|-----------|------|---------|---|------|-------|---|---|------|------|----|---|------|
| Total | solids | mass | =         | 1.22 | (gm) | density | =         | 2.69 | (gm/cc) |   |      |       |   |   |      |      |    |   |      |
|       | G      | =    | -20748.87 | (J)  | H    | =       | -16957.64 | (J)  | S       | = | 2.82 | (J/K) | V | = | 0.45 | (cc) | Cp | = | 1.48 |

|         |    |     |              |         |        |      |   |      |        |  |  |  |  |  |  |  |  |  |  |
|---------|----|-----|--------------|---------|--------|------|---|------|--------|--|--|--|--|--|--|--|--|--|--|
| Summary | of | all | fractionated | phases: | (total | mass | = | 1.33 | grams) |  |  |  |  |  |  |  |  |  |  |
|---------|----|-----|--------------|---------|--------|------|---|------|--------|--|--|--|--|--|--|--|--|--|--|

|          |                                 |           |           |      |         |   |           |         |           |    |      |       |   |   |      |      |    |   |      |
|----------|---------------------------------|-----------|-----------|------|---------|---|-----------|---------|-----------|----|------|-------|---|---|------|------|----|---|------|
| feldspar | mass                            | =         | 1.33      | (gm) | density | = | 2.69      | (gm/cc) | (analysis | in | mole | %)    |   |   |      |      |    |   |      |
|          | K0.00Na0.15Ca0.85Al1.85Si2.15O8 |           |           |      |         |   |           |         |           |    |      |       |   |   |      |      |    |   |      |
|          | G                               | =         | -22724.52 | (J)  | H       | = | -18573.41 | (J)     | S         | =  | 3.09 | (J/K) | V | = | 0.49 | (cc) | Cp | = | 1.62 |
|          | albite                          | anorthite | sanidine  |      |         |   |           |         |           |    |      |       |   |   |      |      |    |   |      |
|          | 14.6                            | 85.12     | 0.28      |      |         |   |           |         |           |    |      |       |   |   |      |      |    |   |      |

|           |    |     |         |      |      |    |        |  |  |  |  |  |  |  |  |  |  |  |  |
|-----------|----|-----|---------|------|------|----|--------|--|--|--|--|--|--|--|--|--|--|--|--|
| Viscosity | of | the | System: | 3.03 | (log | 10 | poise) |  |  |  |  |  |  |  |  |  |  |  |  |
|-----------|----|-----|---------|------|------|----|--------|--|--|--|--|--|--|--|--|--|--|--|--|

|        |      |   |            |      |         |   |             |         |   |   |        |       |   |   |       |      |    |   |        |
|--------|------|---|------------|------|---------|---|-------------|---------|---|---|--------|-------|---|---|-------|------|----|---|--------|
| System | mass | = | 99.35      | (gm) | density | = | 2.39        | (gm/cc) |   |   |        |       |   |   |       |      |    |   |        |
|        | G    | = | -1631579.5 | (J)  | H       | = | -1260394.03 | (J)     | S | = | 276.26 | (J/K) | V | = | 41.64 | (cc) | Cp | = | 143.38 |

|        |       |       |       |          |       |       |      |             |   |   |      |       |   |   |      |      |    |   |   |
|--------|-------|-------|-------|----------|-------|-------|------|-------------|---|---|------|-------|---|---|------|------|----|---|---|
| Oxygen | delta | moles | =     | 1.98E-05 | delta | grams | =    | 0.000633332 |   |   |      |       |   |   |      |      |    |   |   |
|        | G     | =     | -6.07 | (J)      | H     | =     | 0.69 | (J)         | S | = | 0.01 | (J/K) | V | = | 2.21 | (cc) | Cp | = | 0 |

\*\*\*\*\*-----\*\*\*\*\*

Model 828 Bokan

|           |   |         |
|-----------|---|---------|
| Temp (oC) | = | 1065.47 |
|-----------|---|---------|

|            |        |      |             |       |         |             |             |         |           |     |        |       |      |        |           |      |     |        |        |
|------------|--------|------|-------------|-------|---------|-------------|-------------|---------|-----------|-----|--------|-------|------|--------|-----------|------|-----|--------|--------|
| Constraint | Flags: | fO2  | path        | =     | QFM     | Fractionate | Solids      |         |           |     |        |       |      |        |           |      |     |        |        |
| Liquid     | mass   | =    | 95.62       | (gm)  | density | =           | 2.38        | (gm/cc) | viscosity | =   | 3      | (log  | 10   | poise) | (analysis | in   | wt  | %)     |        |
|            | G      | =    | -1566632.59 | (J)   | H       | =           | -1209458.57 | (J)     | S         | =   | 266.82 | (J/K) | V    | =      | 40.22     | (cc) | Cp  | =      | 138.53 |
|            | SiO2   | TiO2 | Al2O3       | Fe2O3 | Cr2O3   | FeO         | MnO         | MgO     | NiO       | CoO | CaO    | Na2O  | K2O  | P2O5   | H2O       | CO2  | SO3 | Cl2O-1 | F2O-1  |
|            | 53.87  | 0.61 | 18.91       | 1.3   | 0       | 6.12        | 0.23        | 2.71    | 0         | 0   | 8.46   | 3.19  | 1.26 | 0.22   | 3.14      | 0    | 0   | 0      | 0      |

|          |                                 |           |           |      |         |   |           |         |           |    |      |       |   |   |      |      |    |   |      |
|----------|---------------------------------|-----------|-----------|------|---------|---|-----------|---------|-----------|----|------|-------|---|---|------|------|----|---|------|
| feldspar | mass                            | =         | 1.18      | (gm) | density | = | 2.69      | (gm/cc) | (analysis | in | mole | %)    |   |   |      |      |    |   |      |
|          | K0.00Na0.15Ca0.85Al1.85Si2.15O8 |           |           |      |         |   |           |         |           |    |      |       |   |   |      |      |    |   |      |
|          | G                               | =         | -20176.45 | (J)  | H       | = | -16507.27 | (J)     | S         | =  | 2.74 | (J/K) | V | = | 0.44 | (cc) | Cp | = | 1.44 |
|          | albite                          | anorthite | sanidine  |      |         |   |           |         |           |    |      |       |   |   |      |      |    |   |      |
|          | 15.19                           | 84.51     | 0.3       |      |         |   |           |         |           |    |      |       |   |   |      |      |    |   |      |

|       |        |      |           |      |      |         |           |      |         |   |      |       |   |   |      |      |    |   |      |
|-------|--------|------|-----------|------|------|---------|-----------|------|---------|---|------|-------|---|---|------|------|----|---|------|
| Total | solids | mass | =         | 1.18 | (gm) | density | =         | 2.69 | (gm/cc) |   |      |       |   |   |      |      |    |   |      |
|       | G      | =    | -20176.45 | (J)  | H    | =       | -16507.27 | (J)  | S       | = | 2.74 | (J/K) | V | = | 0.44 | (cc) | Cp | = | 1.44 |

|           |                                 |                 |               |          |         |       |             |             |           |    |        |       |   |   |      |      |    |   |        |       |
|-----------|---------------------------------|-----------------|---------------|----------|---------|-------|-------------|-------------|-----------|----|--------|-------|---|---|------|------|----|---|--------|-------|
| Summary   | of                              | all             | fractionated  | phases:  | (total  | mass  | =           | 2.54        | grams)    |    |        |       |   |   |      |      |    |   |        |       |
| feldspar  | mass                            | =               | 2.54          | (gm)     | density | =     | 2.69        | (gm/cc)     | (analysis | in | mole   | %)    |   |   |      |      |    |   |        |       |
|           | K0.00Na0.15Ca0.85Al1.85Si2.15O8 |                 |               | (J)      | H       | =     | -35508.04   | (J)         | S         | =  | 5.89   | (J/K) | V | = | 0.95 | (cc) | Cp | = | 3.09   | (J/K) |
|           | G albite 14.74                  | =               | -43396.83     |          |         |       |             |             |           |    |        |       |   |   |      |      |    |   |        |       |
|           |                                 | anorthite 84.97 | sanidine 0.29 |          |         |       |             |             |           |    |        |       |   |   |      |      |    |   |        |       |
| Viscosity | of                              | the             | System:       | 3.06     | (log    | 10    | poise)      |             |           |    |        |       |   |   |      |      |    |   |        |       |
| System    | mass                            | =               | 99.35         | (gm)     | density | =     | 2.39        | (gm/cc)     |           |    |        |       |   |   |      |      |    |   |        |       |
|           | G                               | =               | -1630205.87   | (J)      | H       | =     | -1261473.89 | (J)         | S         | =  | 275.46 | (J/K) | V | = | 41.6 | (cc) | Cp | = | 143.05 | (J/K) |
| Oxygen    | delta                           | moles           | =             | 3.02E-05 | delta   | grams | =           | 0.000967535 |           |    |        |       |   |   |      |      |    |   |        |       |
|           | G                               | =               | -9.23         | (J)      | H       | =     | 1.05        | (J)         | S         | =  | 0.01   | (J/K) | V | = | 3.37 | (cc) | Cp | = | 0      | (J/K) |

\*\*\*\*\*-----\*\*\*\*\*

Model 828 Bokan

|            |                                 |                 |               |          |         |             |             |            |           |     |        |       |      |        |           |      |     |        |        |       |
|------------|---------------------------------|-----------------|---------------|----------|---------|-------------|-------------|------------|-----------|-----|--------|-------|------|--------|-----------|------|-----|--------|--------|-------|
| Temp (oC)  | =                               | 1060.47         |               |          |         |             |             |            |           |     |        |       |      |        |           |      |     |        |        |       |
| Constraint | Flags:                          | fO2             | path          | =        | QFM     | Fractionate | Solids      |            |           |     |        |       |      |        |           |      |     |        |        |       |
| Liquid     | mass                            | =               | 94.47         | (gm)     | density | =           | 2.38        | (gm/cc)    | viscosity | =   | 3.01   | (log  | 10   | poise) | (analysis | in   | wt  | %)     |        |       |
|            | G                               | =               | -1545725.24   | (J)      | H       | =           | -1194465.99 | (J)        | S         | =   | 263.39 | (J/K) | V    | =      | 39.75     | (cc) | Cp  | =      | 136.82 | (J/K) |
|            | SiO2                            | TiO2            | Al2O3         | Fe2O3    | Cr2O3   | FeO         | MnO         | MgO        | NiO       | CoO | CaO    | Na2O  | K2O  | P2O5   | H2O       | CO2  | SO3 | Cl2O-1 | F2O-1  |       |
|            | 53.95                           | 0.61            | 18.73         | 1.32     | 0       | 6.19        | 0.23        | 2.74       | 0         | 0   | 8.35   | 3.2   | 1.28 | 0.22   | 3.18      | 0    | 0   | 0      | 0      |       |
| feldspar   | mass                            | =               | 1.15          | (gm)     | density | =           | 2.69        | (gm/cc)    | (analysis | in  | mole   | %)    |      |        |           |      |     |        |        |       |
|            | K0.00Na0.15Ca0.84Al1.84Si2.16O8 |                 |               | (J)      | H       | =           | -16075.52   | (J)        | S         | =   | 2.66   | (J/K) | V    | =      | 0.43      | (cc) | Cp  | =      | 1.4    | (J/K) |
|            | G                               | =               | -19627.99     |          |         |             |             |            |           |     |        |       |      |        |           |      |     |        |        |       |
|            | albite 15.49                    | anorthite 84.2  | sanidine 0.31 |          |         |             |             |            |           |     |        |       |      |        |           |      |     |        |        |       |
| Total      | solids                          | mass            | =             | 1.15     | (gm)    | density     | =           | 2.69       | (gm/cc)   |     |        |       |      |        |           |      |     |        |        |       |
|            | G                               | =               | -19627.99     | (J)      | H       | =           | -16075.52   | (J)        | S         | =   | 2.66   | (J/K) | V    | =      | 0.43      | (cc) | Cp  | =      | 1.4    | (J/K) |
| Summary    | of                              | all             | fractionated  | phases:  | (total  | mass        | =           | 3.73       | grams)    |     |        |       |      |        |           |      |     |        |        |       |
| feldspar   | mass                            | =               | 3.73          | (gm)     | density | =           | 2.69        | (gm/cc)    | (analysis | in  | mole   | %)    |      |        |           |      |     |        |        |       |
|            | K0.00Na0.15Ca0.85Al1.85Si2.15O8 |                 |               | (J)      | H       | =           | -51999.46   | (J)        | S         | =   | 8.61   | (J/K) | V    | =      | 1.38      | (cc) | Cp  | =      | 4.52   | (J/K) |
|            | G albite 14.88                  | =               | -63483.16     |          |         |             |             |            |           |     |        |       |      |        |           |      |     |        |        |       |
|            |                                 | anorthite 84.82 | sanidine 0.29 |          |         |             |             |            |           |     |        |       |      |        |           |      |     |        |        |       |
| Viscosity  | of                              | the             | System:       | 3.09     | (log    | 10          | poise)      |            |           |     |        |       |      |        |           |      |     |        |        |       |
| System     | mass                            | =               | 99.35         | (gm)     | density | =           | 2.39        | (gm/cc)    |           |     |        |       |      |        |           |      |     |        |        |       |
|            | G                               | =               | -1628836.39   | (J)      | H       | =           | -1262540.97 | (J)        | S         | =   | 274.66 | (J/K) | V    | =      | 41.56     | (cc) | Cp  | =      | 142.74 | (J/K) |
| Oxygen     | delta                           | moles           | =             | 4.10E-05 | delta   | grams       | =           | 0.00131079 |           |     |        |       |      |        |           |      |     |        |        |       |
|            | G                               | =               | -12.45        | (J)      | H       | =           | 1.41        | (J)        | S         | =   | 0.01   | (J/K) | V    | =      | 4.54      | (cc) | Cp  | =      | 0      | (J/K) |

\*\*\*\*\*-----\*\*\*\*\*

Model 828 Bokan

|            |        |         |            |      |         |             |             |         |           |   |        |       |    |        |           |      |    |    |        |       |
|------------|--------|---------|------------|------|---------|-------------|-------------|---------|-----------|---|--------|-------|----|--------|-----------|------|----|----|--------|-------|
| Temp (oC)  | =      | 1055.47 |            |      |         |             |             |         |           |   |        |       |    |        |           |      |    |    |        |       |
| Constraint | Flags: | fO2     | path       | =    | QFM     | Fractionate | Solids      |         |           |   |        |       |    |        |           |      |    |    |        |       |
| Liquid     | mass   | =       | 93.35      | (gm) | density | =           | 2.38        | (gm/cc) | viscosity | = | 3.02   | (log  | 10 | poise) | (analysis | in   | wt | %) |        |       |
|            | G      | =       | -1525360.9 | (J)  | H       | =           | -1179868.29 | (J)     | S         | = | 260.04 | (J/K) | V  | =      | 39.29     | (cc) | Cp | =  | 135.15 | (J/K) |



|                 |                                         |                        |                                                               |                       |                    |                   |                     |                        |                |          |                 |               |             |               |             |                    |                 |             |            |                 |
|-----------------|-----------------------------------------|------------------------|---------------------------------------------------------------|-----------------------|--------------------|-------------------|---------------------|------------------------|----------------|----------|-----------------|---------------|-------------|---------------|-------------|--------------------|-----------------|-------------|------------|-----------------|
| Oxygen          | delta<br>G                              | moles<br>=             | =<br>-19.07                                                   | =<br>6.33E-05<br>(J)  | delta<br>H         | grams<br>=        | =<br>2.16           | =<br>0.00202511<br>(J) | S              | =        | 0.02            | (J/K)         | V           | =             | 6.96        | (cc)               | Cp              | =           | 0          | (J/K)           |
| *****-----***** |                                         |                        |                                                               |                       |                    |                   |                     |                        |                |          |                 |               |             |               |             |                    |                 |             |            |                 |
| Model 828 Bokan |                                         |                        |                                                               |                       |                    |                   |                     |                        |                |          |                 |               |             |               |             |                    |                 |             |            |                 |
| Temp (oC)       | =                                       | 1045.47                |                                                               |                       |                    |                   |                     |                        |                |          |                 |               |             |               |             |                    |                 |             |            |                 |
| Constraint      | Flags:                                  | fO2                    | path                                                          | =                     | QFM                | Fractionate       | Solids              |                        |                |          |                 |               |             |               |             |                    |                 |             |            |                 |
| Liquid          | mass<br>G                               | =<br>=                 | 91.01<br>-1483264.57                                          | (gm)<br>(J)           | density<br>H       | =<br>=            | 2.37<br>-1149513.41 | (gm/cc)<br>(J)         | viscosity<br>S | =<br>=   | 3.05<br>253.11  | (log<br>(J/K) | 10<br>V     | =<br>=        | poise)<br>= | (analysis<br>38.34 | in<br>(cc)      | wt<br>Cp    | =<br>=     | 131.66<br>(J/K) |
|                 | SiO2<br>54.2                            | TiO2<br>0.64           | Al2O3<br>18.23                                                | Fe2O3<br>1.37         | Cr2O3<br>0         | FeO<br>6.39       | MnO<br>0.24         | MgO<br>2.81            | NiO<br>0       | CoO<br>0 | CaO<br>8.01     | Na2O<br>3.26  | K2O<br>1.32 | P2O5<br>0.23  | H2O<br>3.3  | CO2<br>0           | SO3<br>0        | Cl2O-1<br>0 | F2O-1<br>0 |                 |
| cpx             | mass<br>cpx<br>G                        | =<br>=                 | 0.25<br>Na0.01Ca0.85Fe"0.21Mg0.77Fe""0.06Ti0.02Al0.24Si1.84O6 | (gm)<br>(J)           | density<br>H       | =<br>=            | 3.28<br>-3153.42    | (gm/cc)<br>(J)         | (analysis<br>S | in<br>=  | mole<br>0.55    | %<br>(J/K)    |             |               |             |                    |                 |             |            |                 |
|                 | diopside<br>47.89                       | clinoenstatit<br>13.46 | hedenbergite<br>21.11                                         | alumno-buffo<br>10.38 | buffonite<br>-6.03 | essenite<br>11.91 | jadeite<br>1.27     |                        |                |          |                 |               |             |               |             |                    |                 |             |            |                 |
| feldspar        | mass<br>K0.00Na0.16Ca0.83Al1.83Si2.17O8 | =<br>=                 | 1.01<br>-17150.96                                             | (gm)<br>(J)           | density<br>H       | =<br>=            | 2.69<br>-14091.17   | (gm/cc)<br>(J)         | (analysis<br>S | in<br>=  | mole<br>2.32    | %<br>(J/K)    |             |               |             |                    |                 |             |            |                 |
|                 | albite<br>16.44                         | anorthite<br>83.23     | sanidine<br>0.33                                              |                       |                    |                   |                     |                        |                |          |                 |               |             |               |             |                    |                 |             |            |                 |
| Total           | solids<br>G                             | mass<br>=              | =<br>-21024.82                                                | 1.26<br>(J)           | (gm)<br>H          | density<br>=      | =<br>-17244.59      | 2.79<br>(J)            | (gm/cc)<br>S   | =<br>=   | 2.87<br>(J/K)   | V             | =<br>=      | 0.45<br>(cc)  | Cp          | =<br>=             | 1.51<br>(J/K)   |             |            |                 |
| Summary         | of                                      | all                    | fractionated                                                  | phases:               | (total             | mass              | =                   | 7.08                   | grams)         |          |                 |               |             |               |             |                    |                 |             |            |                 |
| feldspar        | mass<br>K0.00Na0.15Ca0.84Al1.84Si2.16O8 | =<br>=                 | 7.08<br>-120463.74                                            | (gm)<br>(J)           | density<br>H       | =<br>=            | 2.69<br>-98993.88   | (gm/cc)<br>(J)         | (analysis<br>S | in<br>=  | mole<br>16.28   | %<br>(J/K)    |             |               |             |                    |                 |             |            |                 |
|                 | albite<br>15.31                         | anorthite<br>84.38     | sanidine<br>0.3                                               |                       |                    |                   |                     |                        |                |          |                 |               |             |               |             |                    |                 |             |            |                 |
| Viscosity       | of                                      | the                    | System:                                                       | 3.19                  | (log               | 10                | poise)              |                        |                |          |                 |               |             |               |             |                    |                 |             |            |                 |
| System          | mass<br>G                               | =<br>=                 | 99.35<br>-1624753.13                                          | (gm)<br>(J)           | density<br>H       | =<br>=            | 2.4<br>-1265751.88  | (gm/cc)<br>(J)         | S              | =<br>=   | 272.26<br>(J/K) | V             | =<br>=      | 41.42<br>(cc) | Cp          | =<br>=             | 141.75<br>(J/K) |             |            |                 |
| Oxygen          | delta<br>G                              | moles<br>=             | =<br>-22.78                                                   | =<br>7.59E-05<br>(J)  | delta<br>H         | grams<br>=        | =<br>2.58           | =<br>0.00242911<br>(J) | S              | =<br>=   | 0.02<br>(J/K)   | V             | =<br>=      | 8.32<br>(cc)  | Cp          | =<br>=             | 0<br>(J/K)      |             |            |                 |
| *****-----***** |                                         |                        |                                                               |                       |                    |                   |                     |                        |                |          |                 |               |             |               |             |                    |                 |             |            |                 |
| Model 828 Bokan |                                         |                        |                                                               |                       |                    |                   |                     |                        |                |          |                 |               |             |               |             |                    |                 |             |            |                 |
| Temp (oC)       | =                                       | 1040.47                |                                                               |                       |                    |                   |                     |                        |                |          |                 |               |             |               |             |                    |                 |             |            |                 |
| Constraint      | Flags:                                  | fO2                    | path                                                          | =                     | QFM                | Fractionate       | Solids              |                        |                |          |                 |               |             |               |             |                    |                 |             |            |                 |
| Liquid          | mass<br>G                               | =<br>=                 | 89.27<br>-1453672.85                                          | (gm)<br>(J)           | density<br>H       | =<br>=            | 2.37<br>-1127592.1  | (gm/cc)<br>(J)         | viscosity<br>S | =<br>=   | 3.07<br>248.23  | (log<br>(J/K) | 10<br>V     | =<br>=        | poise)<br>= | (analysis<br>37.67 | in<br>(cc)      | wt<br>Cp    | =<br>=     | 129.02<br>(J/K) |
|                 | SiO2<br>54.31                           | TiO2<br>0.64           | Al2O3<br>18.22                                                | Fe2O3<br>1.38         | Cr2O3<br>0         | FeO<br>6.44       | MnO<br>0.25         | MgO<br>2.72            | NiO<br>0       | CoO<br>0 | CaO<br>7.79     | Na2O<br>3.31  | K2O<br>1.35 | P2O5<br>0.24  | H2O<br>3.36 | CO2<br>0           | SO3<br>0        | Cl2O-1<br>0 | F2O-1<br>0 |                 |
| cpx             | mass<br>cpx<br>G                        | =<br>=                 | 0.94<br>Na0.01Ca0.85Fe"0.22Mg0.77Fe""0.06Ti0.02Al0.24Si1.84O6 | (gm)<br>(J)           | density<br>H       | =<br>=            | 3.28<br>-11920.11   | (gm/cc)<br>(J)         | (analysis<br>S | in<br>=  | mole<br>2.06    | %<br>(J/K)    |             |               |             |                    |                 |             |            |                 |
|                 | diopside                                | clinoenstatit          | hedenbergite                                                  | alumno-buffo          | buffonite          | essenite          | jadeite             |                        |                |          |                 |               |             |               |             |                    |                 |             |            |                 |

|                 |                                 |                                                       |                          |                     |                 |                |              |           |           |            |        |        |       |        |           |       |      |        |        |        |       |   |       |
|-----------------|---------------------------------|-------------------------------------------------------|--------------------------|---------------------|-----------------|----------------|--------------|-----------|-----------|------------|--------|--------|-------|--------|-----------|-------|------|--------|--------|--------|-------|---|-------|
| feldspar        | 46.86                           | 13.72                                                 | 21.66                    | 10.48               | -5.92           | 11.9           | 1.3          |           |           |            |        |        |       |        |           |       |      |        |        |        |       |   |       |
|                 | mass                            | =                                                     | 0.81                     | (gm)                | density         | =              | 2.69         | (gm/cc)   | (analysis | in         | mole   | %)     |       |        |           |       |      |        |        |        |       |   |       |
|                 | K0.00Na0.17Ca0.83Al1.83Si2.17O8 |                                                       |                          |                     |                 |                |              |           |           |            |        |        |       |        |           |       |      |        |        |        |       |   |       |
|                 | G albite 16.84                  | = anorthite 82.82                                     | -13787.82 sanidine 0.34  | (J)                 | H               | =              | -11339.75    | (J)       | S         | =          | 1.86   | (J/K)  | V     | =      | 0.3       | (cc)  | Cp   | =      | 0.98   | (J/K)  |       |   |       |
| Total           | solids G                        | mass =                                                | -28418.88                | (J)                 | (gm) H          | density =      | -23259.86    | (J)       | (gm/cc) S | =          | 3.93   | (J/K)  | V     | =      | 0.59      | (cc)  | Cp   | =      | 2.07   | (J/K)  |       |   |       |
| Summary         | of                              | all                                                   | fractionated             | phases:             | (total          | mass           | =            | 8.33      | grams)    |            |        |        |       |        |           |       |      |        |        |        |       |   |       |
| cpx             | mass                            | =                                                     | 0.24                     | (gm)                | density         | =              | 3.28         | (gm/cc)   | (analysis | in         | mole   | %)     |       |        |           |       |      |        |        |        |       |   |       |
|                 | cpx G                           | Na0.01Ca0.85Fe"0.21Mg0.77Fe""0.06Ti0.02Al0.24Si1.84O6 |                          |                     |                 |                |              |           |           |            |        |        |       |        |           |       |      |        |        |        |       |   |       |
|                 | G                               | =                                                     | -3836.16                 | (J)                 | H               | =              | -3126.35     | (J)       | S         | =          | 0.54   | (J/K)  | V     | =      | 0.07      | (cc)  | Cp   | =      | 0.28   | (J/K)  |       |   |       |
|                 | diopside 47.89                  | clinoenstatit 13.46                                   | hedenbergite 21.11       | alumino-buffo 10.38 | buffonite -6.03 | essenite 11.91 | jadeite 1.27 |           |           |            |        |        |       |        |           |       |      |        |        |        |       |   |       |
| feldspar        | mass                            | =                                                     | 8.09                     | (gm)                | density         | =              | 2.69         | (gm/cc)   | (analysis | in         | mole   | %)     |       |        |           |       |      |        |        |        |       |   |       |
|                 | K0.00Na0.15Ca0.84Al1.84Si2.16O8 |                                                       |                          |                     |                 |                |              |           |           |            |        |        |       |        |           |       |      |        |        |        |       |   |       |
|                 | G albite 15.45                  | = anorthite 84.24                                     | -137474.96 sanidine 0.31 | (J)                 | H               | =              | -113095.55   | (J)       | S         | =          | 18.56  | (J/K)  | V     | =      | 3         | (cc)  | Cp   | =      | 9.8    | (J/K)  |       |   |       |
|                 | Viscosity                       | of                                                    | the                      | System:             | 3.24            | (log           | 10           | poise)    |           |            |        |        |       |        |           |       |      |        |        |        |       |   |       |
| System          | mass G                          | =                                                     | 99.35                    | (gm)                | density         | =              | 2.4          | (gm/cc)   | (J)       | S          | =      | 271.26 | (J/K) | V      | =         | 41.34 | (cc) | Cp     | =      | 141.17 | (J/K) |   |       |
| Oxygen          | delta G                         | moles =                                               | =                        | 9.15E-05            | (J)             | delta H        | grams =      | =         | 3.09      | 0.00292635 | (J)    | S      | =     | 0.02   | (J/K)     | V     | =    | 9.99   | (cc)   | Cp     | =     | 0 | (J/K) |
| *****-----***** |                                 |                                                       |                          |                     |                 |                |              |           |           |            |        |        |       |        |           |       |      |        |        |        |       |   |       |
| Model 828 Bokan |                                 |                                                       |                          |                     |                 |                |              |           |           |            |        |        |       |        |           |       |      |        |        |        |       |   |       |
| Temp (oC)       | =                               | 1035.47                                               |                          |                     |                 |                |              |           |           |            |        |        |       |        |           |       |      |        |        |        |       |   |       |
| Constraint      | Flags:                          | fO2                                                   | path                     | =                   | QFM             | Fractionate    | Solids       |           |           |            |        |        |       |        |           |       |      |        |        |        |       |   |       |
| Liquid          | mass                            | =                                                     | 87.61                    | (gm)                | density         | =              | 2.37         | (gm/cc)   | viscosity | =          | 3.09   | (log   | 10    | poise) | (analysis | in    | wt   | %)     |        |        |       |   |       |
|                 | G                               | =                                                     | -1425524.33              | (J)                 | H               | =              | -1106764.91  | (J)       | S         | =          | 243.58 | (J/K)  | V     | =      | 37.04     | (cc)  | Cp   | =      | 126.51 | (J/K)  |       |   |       |
|                 | SiO2                            | TiO2                                                  | Al2O3                    | Fe2O3               | Cr2O3           | FeO            | MnO          | MgO       | NiO       | CoO        | CaO    | Na2O   | K2O   | P2O5   | H2O       | CO2   | SO3  | Cl2O-1 | F2O-1  |        |       |   |       |
|                 | 54.42                           | 0.64                                                  | 18.21                    | 1.39                | 0               | 6.48           | 0.25         | 2.63      | 0         | 0          | 7.58   | 3.35   | 1.38  | 0.24   | 3.42      | 0     | 0    | 0      | 0      |        |       |   |       |
| cpx             | mass                            | =                                                     | 0.88                     | (gm)                | density         | =              | 3.28         | (gm/cc)   | (analysis | in         | mole   | %)     |       |        |           |       |      |        |        |        |       |   |       |
|                 | cpx G                           | Na0.01Ca0.85Fe"0.22Mg0.76Fe""0.06Ti0.02Al0.24Si1.83O6 |                          |                     |                 |                |              |           |           |            |        |        |       |        |           |       |      |        |        |        |       |   |       |
|                 | G                               | =                                                     | -13795.51                | (J)                 | H               | =              | -11248.77    | (J)       | S         | =          | 1.95   | (J/K)  | V     | =      | 0.27      | (cc)  | Cp   | =      | 1.02   | (J/K)  |       |   |       |
|                 | diopside 45.79                  | clinoenstatit 13.99                                   | hedenbergite 22.22       | alumino-buffo 10.59 | buffonite -5.81 | essenite 11.88 | jadeite 1.33 |           |           |            |        |        |       |        |           |       |      |        |        |        |       |   |       |
| feldspar        | mass                            | =                                                     | 0.78                     | (gm)                | density         | =              | 2.69         | (gm/cc)   | (analysis | in         | mole   | %)     |       |        |           |       |      |        |        |        |       |   |       |
|                 | K0.00Na0.17Ca0.82Al1.82Si2.18O8 |                                                       |                          |                     |                 |                |              |           |           |            |        |        |       |        |           |       |      |        |        |        |       |   |       |
|                 | G albite 17.26                  | = anorthite 82.39                                     | -13204.22 sanidine 0.35  | (J)                 | H               | =              | -10870.98    | (J)       | S         | =          | 1.78   | (J/K)  | V     | =      | 0.29      | (cc)  | Cp   | =      | 0.94   | (J/K)  |       |   |       |
|                 | Total                           | solids G                                              | mass =                   | -26999.73           | (J)             | (gm) H         | density =    | -22119.74 | (J)       | (gm/cc) S  | =      | 3.73   | (J/K) | V      | =         | 0.56  | (cc) | Cp     | =      | 1.96   | (J/K) |   |       |
| Summary         | of                              | all                                                   | fractionated             | phases:             | (total          | mass           | =            | 10.08     | grams)    |            |        |        |       |        |           |       |      |        |        |        |       |   |       |

[illegible]



|                 |                                         |               |                                                                                      |                    |              |              |                       |                   |                |         |                  |               |         |             |                      |            |          |        |        |       |       |
|-----------------|-----------------------------------------|---------------|--------------------------------------------------------------------------------------|--------------------|--------------|--------------|-----------------------|-------------------|----------------|---------|------------------|---------------|---------|-------------|----------------------|------------|----------|--------|--------|-------|-------|
| System          | mass<br>G                               | =             | 99.35<br>= -1620716.51                                                               | (gm)<br>(J)        | density<br>H | =            | 2.41<br>= -1269613.16 | (gm/cc)<br>(J)    | S              | =       | 269.33           | (J/K)         | V       | =           | 41.18                | (cc)       | Cp       | =      | 140.08 | (J/K) |       |
| Oxygen          | delta<br>G                              | moles<br>=    | =<br>= -36.06                                                                        | 0.00012169<br>(J)  | delta<br>H   | grams<br>=   | =<br>= 4.07           | 0.00389394<br>(J) | S              | =       | 0.03             | (J/K)         | V       | =           | 13.19                | (cc)       | Cp       | =      | 0      | (J/K) |       |
| *****-----***** |                                         |               |                                                                                      |                    |              |              |                       |                   |                |         |                  |               |         |             |                      |            |          |        |        |       |       |
| Model 828 Bokan |                                         |               |                                                                                      |                    |              |              |                       |                   |                |         |                  |               |         |             |                      |            |          |        |        |       |       |
| Temp (oC)       | =                                       | 1025.47       |                                                                                      |                    |              |              |                       |                   |                |         |                  |               |         |             |                      |            |          |        |        |       |       |
| Constraint      | Flags:                                  | fO2           | path                                                                                 | =                  | QFM          | Fractionate  | Solids                |                   |                |         |                  |               |         |             |                      |            |          |        |        |       |       |
| Liquid          | mass<br>G                               | =             | 84.54<br>= -1373158.59                                                               | (gm)<br>(J)        | density<br>H | =            | 2.36<br>= -1068090.64 | (gm/cc)<br>(J)    | viscosity<br>S | =       | 3.14<br>= 234.92 | (log<br>(J/K) | 10<br>V | poise)<br>= | (analysis<br>= 35.85 | in<br>(cc) | wt<br>Cp | %<br>= | 121.85 | (J/K) |       |
|                 | SiO2                                    | TiO2          | Al2O3                                                                                | Fe2O3              | Cr2O3        | FeO          | MnO                   | MgO               | NiO            | CoO     | CaO              | Na2O          | K2O     | P2O5        | H2O                  | CO2        | SO3      | Cl2O-1 | F2O-1  |       |       |
|                 | 54.64                                   | 0.65          | 18.19                                                                                | 1.41               | 0            | 6.57         | 0.26                  | 2.47              | 0              | 0       | 7.16             | 3.43          | 1.42    | 0.25        | 3.55                 | 0          | 0        | 0      | 0      |       |       |
| cpx             | mass<br>cpx<br>G                        | =<br>=        | 0.79<br>Na0.01Ca0.84Fe <sup>0.23</sup> Mg0.75Fe <sup>0.06</sup> Ti0.03Al0.24Si1.83O6 | (gm)<br>(J)        | density<br>H | =            | 3.29<br>= -10047.99   | (gm/cc)<br>(J)    | (analysis<br>S | in<br>= | mole<br>= 1.74   | %<br>(J/K)    |         |             |                      |            | (cc)     | Cp     | =      | 0.91  | (J/K) |
|                 | diopside                                | clinoenstatit | hedenbergite                                                                         | alumno-buffo       | buffonite    | essenite     | jadeite               |                   |                |         |                  |               |         |             |                      |            |          |        |        |       |       |
|                 | 43.55                                   | 14.58         | 23.4                                                                                 | 10.81              | -5.59        | 11.85        | 1.4                   |                   |                |         |                  |               |         |             |                      |            |          |        |        |       |       |
| feldspar        | mass<br>K0.00Na0.18Ca0.81Al1.81Si2.19O8 | =             | 0.72<br>= -12152.15                                                                  | (gm)<br>(J)        | density<br>H | =            | 2.69<br>= -10025.36   | (gm/cc)<br>(J)    | (analysis<br>S | in<br>= | mole<br>= 1.64   | %<br>(J/K)    |         |             |                      |            | (cc)     | Cp     | =      | 0.87  | (J/K) |
|                 | albite                                  | anorthite     | sanidine                                                                             |                    |              |              |                       |                   |                |         |                  |               |         |             |                      |            |          |        |        |       |       |
|                 | 18.14                                   | 81.49         | 0.37                                                                                 |                    |              |              |                       |                   |                |         |                  |               |         |             |                      |            |          |        |        |       |       |
| Total           | solids<br>G                             | mass<br>=     | =<br>= -24454.71                                                                     | 1.51<br>(J)        | (gm)<br>H    | density<br>= | =<br>= -20073.35      | 2.97<br>(J)       | (gm/cc)<br>S   | =       | 3.37             | (J/K)         | V       | =           | 0.51                 | (cc)       | Cp       | =      | 1.78   | (J/K) |       |
| Summary         | of                                      | all           | fractionated                                                                         | phases:            | (total       | mass         | =                     | 13.31             | grams)         |         |                  |               |         |             |                      |            |          |        |        |       |       |
| cpx             | mass<br>cpx<br>G                        | =<br>=        | 2.89<br>Na0.01Ca0.85Fe <sup>0.22</sup> Mg0.76Fe <sup>0.06</sup> Ti0.02Al0.24Si1.83O6 | (gm)<br>(J)        | density<br>H | =            | 3.28<br>= -36871.47   | (gm/cc)<br>(J)    | (analysis<br>S | in<br>= | mole<br>= 6.35   | %<br>(J/K)    |         |             |                      |            | (cc)     | Cp     | =      | 3.35  | (J/K) |
|                 | diopside                                | clinoenstatit | hedenbergite                                                                         | alumno-buffo       | buffonite    | essenite     | jadeite               |                   |                |         |                  |               |         |             |                      |            |          |        |        |       |       |
|                 | 46                                      | 13.94         | 22.11                                                                                | 10.57              | -5.83        | 11.89        | 1.33                  |                   |                |         |                  |               |         |             |                      |            |          |        |        |       |       |
| feldspar        | mass<br>K0.00Na0.16Ca0.84Al1.84Si2.16O8 | =             | 10.42<br>= -176655.21                                                                | (gm)<br>(J)        | density<br>H | =            | 2.69<br>= -145799.78  | (gm/cc)<br>(J)    | (analysis<br>S | in<br>= | mole<br>= 23.76  | %<br>(J/K)    |         |             |                      |            | (cc)     | Cp     | =      | 12.6  | (J/K) |
|                 | albite                                  | anorthite     | sanidine                                                                             |                    |              |              |                       |                   |                |         |                  |               |         |             |                      |            |          |        |        |       |       |
|                 | 15.86                                   | 83.83         | 0.32                                                                                 |                    |              |              |                       |                   |                |         |                  |               |         |             |                      |            |          |        |        |       |       |
| Viscosity       | of                                      | the           | System:                                                                              | 3.39               | (log         | 10           | poise)                |                   |                |         |                  |               |         |             |                      |            |          |        |        |       |       |
| System          | mass<br>G                               | =             | 99.35<br>= -1619380.28                                                               | (gm)<br>(J)        | density<br>H | =            | 2.42<br>= -1270835.24 | (gm/cc)<br>(J)    | S              | =       | 268.4            | (J/K)         | V       | =           | 41.11                | (cc)       | Cp       | =      | 139.58 | (J/K) |       |
| Oxygen          | delta<br>G                              | moles<br>=    | =<br>= -40.26                                                                        | 0.000136447<br>(J) | delta<br>H   | grams<br>=   | =<br>= 4.54           | 0.00436614<br>(J) | S              | =       | 0.03             | (J/K)         | V       | =           | 14.73                | (cc)       | Cp       | =      | 0      | (J/K) |       |
| *****-----***** |                                         |               |                                                                                      |                    |              |              |                       |                   |                |         |                  |               |         |             |                      |            |          |        |        |       |       |
| Model 828 Bokan |                                         |               |                                                                                      |                    |              |              |                       |                   |                |         |                  |               |         |             |                      |            |          |        |        |       |       |
| Temp (oC)       | =                                       | 1020.47       |                                                                                      |                    |              |              |                       |                   |                |         |                  |               |         |             |                      |            |          |        |        |       |       |
| Constraint      | Flags:                                  | fO2           | path                                                                                 | =                  | QFM          | Fractionate  | Solids                |                   |                |         |                  |               |         |             |                      |            |          |        |        |       |       |

|           |                                 |               |                                                       |               |           |          |             |           |           |     |        |       |      |        |           |      |     |        |        |       |
|-----------|---------------------------------|---------------|-------------------------------------------------------|---------------|-----------|----------|-------------|-----------|-----------|-----|--------|-------|------|--------|-----------|------|-----|--------|--------|-------|
| Liquid    | mass                            | =             | 82.65                                                 | (gm           | density   | =        | 2.36        | (gm/cc)   | viscosity | =   | 3.17   | (log  | 10   | poise) | (analysis | in   | wt  | %)     |        |       |
|           | G                               | =             | -1340896.2                                            | (J)           | H         | =        | -1044119.26 | (J)       | S         | =   | 229.42 | (J/K) | V    | =      | 35.08     | (cc) | Cp  | =      | 118.96 | (J/K) |
|           | SiO2                            | TiO2          | Al2O3                                                 | Fe2O3         | Cr2O3     | FeO      | MnO         | MgO       | NiO       | CoO | CaO    | Na2O  | K2O  | P2O5   | H2O       | CO2  | SO3 | Cl2O-1 | F2O-1  |       |
|           | 54.81                           | 0.65          | 18.14                                                 | 1.43          | 0         | 6.63     | 0.27        | 2.39      | 0         | 0   | 6.91   | 3.48  | 1.46 | 0.25   | 3.58      | 0    | 0   | 0      | 0      |       |
| cpx       | mass                            | =             | 0.83                                                  | (gm           | density   | =        | 3.3         | (gm/cc)   | (analysis | in  | mole   | %)    |      |        |           |      |     |        |        |       |
|           | cpx                             | =             | Na0.01Ca0.83Fe"0.24Mg0.75Fe""0.06Ti0.03Al0.24Si1.83O6 | (J)           | H         | =        | -10551.96   | (J)       | S         | =   | 1.82   | (J/K) | V    | =      | 0.25      | (cc) | Cp  | =      | 0.96   | (J/K) |
|           | G                               | =             | -12910.5                                              | (J)           | H         | =        | -10551.96   | (J)       | S         | =   | 1.82   | (J/K) | V    | =      | 0.25      | (cc) | Cp  | =      | 0.96   | (J/K) |
|           | diopside                        | clinoenstatit | hedenbergite                                          | alumino-buffo | buffonite | essenite | jadeite     |           |           |     |        |       |      |        |           |      |     |        |        |       |
|           | 41.99                           | 15.15         | 24.23                                                 | 10.84         | -5.45     | 11.8     | 1.44        |           |           |     |        |       |      |        |           |      |     |        |        |       |
| feldspar  | mass                            | =             | 1.01                                                  | (gm           | density   | =        | 2.69        | (gm/cc)   | (analysis | in  | mole   | %)    |      |        |           |      |     |        |        |       |
|           | K0.00Na0.19Ca0.81Al1.81Si2.19O8 |               |                                                       | (J)           | H         | =        | -14188.5    | (J)       | S         | =   | 2.31   | (J/K) | V    | =      | 0.38      | (cc) | Cp  | =      | 1.23   | (J/K) |
|           | G                               | =             | -17181.81                                             | (J)           | H         | =        | -14188.5    | (J)       | S         | =   | 2.31   | (J/K) | V    | =      | 0.38      | (cc) | Cp  | =      | 1.23   | (J/K) |
|           | albite                          | anorthite     | sanidine                                              |               |           |          |             |           |           |     |        |       |      |        |           |      |     |        |        |       |
|           | 18.89                           | 80.72         | 0.39                                                  |               |           |          |             |           |           |     |        |       |      |        |           |      |     |        |        |       |
| water     | mass                            | =             | 0.04                                                  | (gm           | density   | =        | 0.17        | (gm/cc)   |           |     |        |       |      |        |           |      |     |        |        |       |
|           | H2O                             |               |                                                       | (J)           | H         | =        | -508.2      | (J)       | S         | =   | 0.45   | (J/K) | V    | =      | 0.26      | (cc) | Cp  | =      | 0.14   | (J/K) |
|           | G                               | =             | -1086.59                                              | (J)           | H         | =        | -508.2      | (J)       | S         | =   | 0.45   | (J/K) | V    | =      | 0.26      | (cc) | Cp  | =      | 0.14   | (J/K) |
| Total     | solids                          | mass          | =                                                     | 1.89          | (gm       | density  | =           | 2.13      | (gm/cc)   |     |        |       |      |        |           |      |     |        |        |       |
|           | G                               | =             | -31178.9                                              | (J)           | H         | =        | -25248.67   | (J)       | S         | =   | 4.58   | (J/K) | V    | =      | 0.89      | (cc) | Cp  | =      | 2.32   | (J/K) |
| Summary   | of                              | all           | fractionated                                          | phases:       | (total    | mass     | =           | 14.81     | grams)    |     |        |       |      |        |           |      |     |        |        |       |
| cpx       | mass                            | =             | 3.68                                                  | (gm           | density   | =        | 3.29        | (gm/cc)   | (analysis | in  | mole   | %)    |      |        |           |      |     |        |        |       |
|           | cpx                             | =             | Na0.01Ca0.85Fe"0.22Mg0.76Fe""0.06Ti0.02Al0.24Si1.83O6 | (J)           | H         | =        | -46912.31   | (J)       | S         | =   | 8.06   | (J/K) | V    | =      | 1.12      | (cc) | Cp  | =      | 4.25   | (J/K) |
|           | G                               | =             | -57339.2                                              | (J)           | H         | =        | -46912.31   | (J)       | S         | =   | 8.06   | (J/K) | V    | =      | 1.12      | (cc) | Cp  | =      | 4.25   | (J/K) |
|           | diopside                        | clinoenstatit | hedenbergite                                          | alumino-buffo | buffonite | essenite | jadeite     |           |           |     |        |       |      |        |           |      |     |        |        |       |
|           | 45.47                           | 14.08         | 22.39                                                 | 10.62         | -5.78     | 11.88    | 1.34        |           |           |     |        |       |      |        |           |      |     |        |        |       |
| feldspar  | mass                            | =             | 11.13                                                 | (gm           | density   | =        | 2.69        | (gm/cc)   | (analysis | in  | mole   | %)    |      |        |           |      |     |        |        |       |
|           | K0.00Na0.16Ca0.84Al1.84Si2.16O8 |               |                                                       | (J)           | H         | =        | -155853.87  | (J)       | S         | =   | 25.34  | (J/K) | V    | =      | 4.13      | (cc) | Cp  | =      | 13.45  | (J/K) |
|           | G                               | =             | -188633.86                                            | (J)           | H         | =        | -155853.87  | (J)       | S         | =   | 25.34  | (J/K) | V    | =      | 4.13      | (cc) | Cp  | =      | 13.45  | (J/K) |
|           | albite                          | anorthite     | sanidine                                              |               |           |          |             |           |           |     |        |       |      |        |           |      |     |        |        |       |
|           | 16                              | 83.68         | 0.32                                                  |               |           |          |             |           |           |     |        |       |      |        |           |      |     |        |        |       |
| Viscosity | of                              | the           | System:                                               | 3.48          | (log      | 10       | poise)      |           |           |     |        |       |      |        |           |      |     |        |        |       |
| System    | mass                            | =             | 99.35                                                 | (gm           | density   | =        | 2.41        | (gm/cc)   |           |     |        |       |      |        |           |      |     |        |        |       |
|           | G                               | =             | -1618048.17                                           | (J)           | H         | =        | -1272134.1  | (J)       | S         | =   | 267.4  | (J/K) | V    | =      | 41.22     | (cc) | Cp  | =      | 138.99 | (J/K) |
| Oxygen    | delta                           | moles         | =                                                     | 0.000150021   | delta     | grams    | =           | 0.0048005 |           |     |        |       |      |        |           |      |     |        |        |       |
|           | G                               | =             | -44.07                                                | (J)           | H         | =        | 4.97        | (J)       | S         | =   | 0.04   | (J/K) | V    | =      | 16.14     | (cc) | Cp  | =      | 0.01   | (J/K) |

\*\*\*\*\*-----\*\*\*\*\*

Model 828 Bokan

Temp (oC) = 1015.47

Constraint Flags: fO2 path = QFM Fractionate Solids

|        |      |      |                                                       |       |         |      |             |         |           |     |        |       |      |        |           |      |     |        |        |       |
|--------|------|------|-------------------------------------------------------|-------|---------|------|-------------|---------|-----------|-----|--------|-------|------|--------|-----------|------|-----|--------|--------|-------|
| Liquid | mass | =    | 80.7                                                  | (gm   | density | =    | 2.36        | (gm/cc) | viscosity | =   | 3.22   | (log  | 10   | poise) | (analysis | in   | wt  | %)     |        |       |
|        | G    | =    | -1307540.46                                           | (J)   | H       | =    | -1019310.06 | (J)     | S         | =   | 223.67 | (J/K) | V    | =      | 34.26     | (cc) | Cp  | =      | 115.97 | (J/K) |
|        | SiO2 | TiO2 | Al2O3                                                 | Fe2O3 | Cr2O3   | FeO  | MnO         | MgO     | NiO       | CoO | CaO    | Na2O  | K2O  | P2O5   | H2O       | CO2  | SO3 | Cl2O-1 | F2O-1  |       |
|        | 55   | 0.66 | 18.08                                                 | 1.44  | 0       | 6.71 | 0.27        | 2.31    | 0         | 0   | 6.65   | 3.54  | 1.49 | 0.26   | 3.59      | 0    | 0   | 0      | 0      |       |
| cpx    | mass | =    | 0.81                                                  | (gm   | density | =    | 3.3         | (gm/cc) | (analysis | in  | mole   | %)    |      |        |           |      |     |        |        |       |
|        | cpx  | =    | Na0.01Ca0.83Fe"0.25Mg0.75Fe""0.06Ti0.03Al0.24Si1.83O6 | (J)   | H       | =    | -10195.64   | (J)     | S         | =   | 1.76   | (J/K) | V    | =      | 0.24      | (cc) | Cp  | =      | 0.93   | (J/K) |
|        | G    | =    | -12466.54                                             | (J)   | H       | =    | -10195.64   | (J)     | S         | =   | 1.76   | (J/K) | V    | =      | 0.24      | (cc) | Cp  | =      | 0.93   | (J/K) |



|                 |                                              |                        |                                      |                        |                    |                   |                     |                   |                |             |                 |               |             |               |                    |             |                |             |            |       |
|-----------------|----------------------------------------------|------------------------|--------------------------------------|------------------------|--------------------|-------------------|---------------------|-------------------|----------------|-------------|-----------------|---------------|-------------|---------------|--------------------|-------------|----------------|-------------|------------|-------|
| water           | mass<br>H2O<br>G                             | =<br>=<br>=            | 0.16<br>-3882.74                     | (gm)<br>(J)            | density<br>H       | =<br>=<br>=       | 0.17<br>-1828.34    | (gm/cc)<br>(J)    | S              | =<br>=<br>= | 1.6<br>(J/K)    | V             | =<br>=<br>= | 0.91<br>(cc)  | Cp                 | =<br>=<br>= | 0.49<br>(J/K)  |             |            |       |
| Total           | solids<br>G                                  | mass<br>=<br>=         | =<br>-32794.08                       | 1.93<br>(J)            | (gm)<br>H          | density<br>=<br>= | =<br>-25643.98      | 1.27<br>(J)       | (gm/cc)<br>S   | =<br>=<br>= | 5.57<br>(J/K)   | V             | =<br>=<br>= | 1.52<br>(cc)  | Cp                 | =<br>=<br>= | 2.59<br>(J/K)  |             |            |       |
| Summary         | of                                           | all                    | fractionated phases:                 |                        | (total             | mass              | =                   | 18.54             | grams)         |             |                 |               |             |               |                    |             |                |             |            |       |
| cpx             | mass<br>cpx<br>G                             | =<br>=<br>=            | 5.32<br>Na0.01Ca0.84Fe"<br>-82539.52 | (gm)<br>(J)            | density<br>H       | =<br>=<br>=       | 3.29<br>-67659.84   | (gm/cc)<br>(J)    | (analysis<br>S | in          | mole            | %)            |             |               |                    |             |                |             |            |       |
|                 | diopside<br>44.13                            | clinoenstatit<br>14.52 | hedenbergite<br>23.1                 | alumino-buffo<br>10.69 | buffonite<br>-5.66 | essenite<br>11.85 | jadeite<br>1.38     |                   |                |             | 11.59           | (J/K)         | V           | =             | 1.62               | (cc)        | Cp             | =           | 6.13       | (J/K) |
|                 |                                              |                        |                                      |                        |                    |                   |                     |                   |                |             |                 |               |             |               |                    |             |                |             |            |       |
| feldspar        | mass<br>K0.00Na0.17Ca0.83Al1.83Si2.17O8<br>G | =<br>=<br>=            | 13.22<br>-223820.69                  | (gm)<br>(J)            | density<br>H       | =<br>=<br>=       | 2.69<br>-185316.23  | (gm/cc)<br>(J)    | (analysis<br>S | in          | mole            | %)            |             |               |                    |             |                |             |            |       |
|                 | albite<br>16.53                              | anorthite<br>83.13     | sanidine<br>0.33                     |                        |                    |                   |                     |                   |                |             | 30              | (J/K)         | V           | =             | 4.91               | (cc)        | Cp             | =           | 16         | (J/K) |
|                 |                                              |                        |                                      |                        |                    |                   |                     |                   |                |             |                 |               |             |               |                    |             |                |             |            |       |
| Viscosity       | of                                           | the                    | System:                              |                        | 3.69               | (log              | 10                  | poise)            |                |             |                 |               |             |               |                    |             |                |             |            |       |
| System          | mass<br>G                                    | =<br>=<br>=            | 99.35<br>-1615397.42                 | (gm)<br>(J)            | density<br>H       | =<br>=<br>=       | 2.39<br>-1274681.28 | (gm/cc)<br>(J)    | S              | =<br>=<br>= | 265.43<br>(J/K) | V             | =<br>=<br>= | 41.55<br>(cc) | Cp                 | =<br>=<br>= | 137.9<br>(J/K) |             |            |       |
| Oxygen          | delta<br>G                                   | moles<br>=<br>=        | =<br>-50.7                           | 0.000174078<br>(J)     | delta<br>H         | grams<br>=<br>=   | =<br>5.7            | 0.00557029<br>(J) | S              | =<br>=<br>= | 0.04<br>(J/K)   | V             | =<br>=<br>= | 18.58<br>(cc) | Cp                 | =<br>=<br>= | 0.01<br>(J/K)  |             |            |       |
| *****_*****     |                                              |                        |                                      |                        |                    |                   |                     |                   |                |             |                 |               |             |               |                    |             |                |             |            |       |
| Model 828 Bokan |                                              |                        |                                      |                        |                    |                   |                     |                   |                |             |                 |               |             |               |                    |             |                |             |            |       |
| Temp (oC)       | =                                            | 1005.47                |                                      |                        |                    |                   |                     |                   |                |             |                 |               |             |               |                    |             |                |             |            |       |
| Constraint      | Flags:                                       | fO2                    | path                                 | =                      | QFM                | Fractionate       | Solids              |                   |                |             |                 |               |             |               |                    |             |                |             |            |       |
| Liquid          | mass<br>G                                    | =<br>=<br>=            | 76.82<br>-1242390.17                 | (gm)<br>(J)            | density<br>H       | =<br>=<br>=       | 2.35<br>-970967.97  | (gm/cc)<br>(J)    | viscosity<br>S | =<br>=<br>= | 3.32<br>212.28  | (log<br>(J/K) | 10<br>V     | poise)<br>=   | (analysis<br>32.67 | in<br>(cc)  | wt<br>Cp       | %<br>=      | 110.04     | (J/K) |
|                 | SiO2<br>55.5                                 | TiO2<br>0.65           | Al2O3<br>17.95                       | Fe2O3<br>1.46          | Cr2O3<br>0         | FeO<br>6.74       | MnO<br>0.29         | MgO<br>2.17       | NiO<br>0       | CoO<br>0    | CaO<br>6.16     | Na2O<br>3.64  | K2O<br>1.56 | P2O5<br>0.27  | H2O<br>3.62        | CO2<br>0    | SO3<br>0       | Cl2O-1<br>0 | F2O-1<br>0 |       |
|                 |                                              |                        |                                      |                        |                    |                   |                     |                   |                |             |                 |               |             |               |                    |             |                |             |            |       |
| cpx             | mass<br>cpx<br>G                             | =<br>=<br>=            | 0.7<br>Na0.02Ca0.81Fe"<br>-10814.74  | (gm)<br>(J)            | density<br>H       | =<br>=<br>=       | 3.31<br>-8856.01    | (gm/cc)<br>(J)    | (analysis<br>S | in          | mole            | %)            |             |               |                    |             |                |             |            |       |
|                 | diopside<br>36.37                            | clinoenstatit<br>17.85 | hedenbergite<br>27.26                | alumino-buffo<br>10.52 | buffonite<br>-5.1  | essenite<br>11.55 | jadeite<br>1.56     |                   |                |             | 1.53            | (J/K)         | V           | =             | 0.21               | (cc)        | Cp             | =           | 0.81       | (J/K) |
|                 |                                              |                        |                                      |                        |                    |                   |                     |                   |                |             |                 |               |             |               |                    |             |                |             |            |       |
| feldspar        | mass<br>K0.00Na0.22Ca0.78Al1.78Si2.22O8<br>G | =<br>=<br>=            | 1.13<br>-19192.07                    | (gm)<br>(J)            | density<br>H       | =<br>=<br>=       | 2.68<br>-15892.96   | (gm/cc)<br>(J)    | (analysis<br>S | in          | mole            | %)            |             |               |                    |             |                |             |            |       |
|                 | albite<br>21.8                               | anorthite<br>77.75     | sanidine<br>0.45                     |                        |                    |                   |                     |                   |                |             | 2.58            | (J/K)         | V           | =             | 0.42               | (cc)        | Cp             | =           | 1.37       | (J/K) |
|                 |                                              |                        |                                      |                        |                    |                   |                     |                   |                |             |                 |               |             |               |                    |             |                |             |            |       |
| spinel          | mass<br>Fe"<br>G                             | =<br>=<br>=            | 0.17<br>-1443.4                      | (gm)<br>(J)            | density<br>H       | =<br>=<br>=       | 4.69<br>-989.99     | (gm/cc)<br>(J)    | (analysis<br>S | in          | mole            | %)            |             |               |                    |             |                |             |            |       |
|                 | chromite<br>0                                | hercynite<br>-8.84     | magnetite<br>55.13                   | spinel<br>22.11        | ulvospinel<br>31.6 |                   |                     |                   |                |             | 0.35            | (J/K)         | V           | =             | 0.04               | (cc)        | Cp             | =           | 0.16       | (J/K) |
|                 |                                              |                        |                                      |                        |                    |                   |                     |                   |                |             |                 |               |             |               |                    |             |                |             |            |       |
| water           | mass<br>H2O<br>G                             | =<br>=<br>=            | 0.22<br>-5362.97                     | (gm)<br>(J)            | density<br>H       | =<br>=<br>=       | 0.17<br>-2533.98    | (gm/cc)<br>(J)    | S              | =<br>=<br>= | 2.21<br>(J/K)   | V             | =<br>=<br>= | 1.25<br>(cc)  | Cp                 | =<br>=<br>= | 0.68<br>(J/K)  |             |            |       |

|                 |                                                   |                                                            |                      |                       |                       |                          |                     |                  |                |          |               |               |             |              |                    |            |          |             |            |       |
|-----------------|---------------------------------------------------|------------------------------------------------------------|----------------------|-----------------------|-----------------------|--------------------------|---------------------|------------------|----------------|----------|---------------|---------------|-------------|--------------|--------------------|------------|----------|-------------|------------|-------|
| Total           | solids<br>G                                       | mass<br>=                                                  | =<br>-36813.18       | 2.23<br>(J)           | (gm)<br>H             | density<br>=             | =<br>-28272.94      | 1.16<br>(J)      | (gm/cc)<br>S   | =        | 6.68          | (J/K)         | V           | =            | 1.93               | (cc)       | Cp       | =           | 3.02       | (J/K) |
| Summary         | of                                                | all                                                        | fractionated         | phases:               | (total                | mass                     | =                   | 20.31            | grams)         |          |               |               |             |              |                    |            |          |             |            |       |
| cpx             | mass<br>cpx<br>G                                  | =<br>Na0.01Ca0.84Fe"0.23Mg0.76Fe""0.06Ti0.03Al0.24Si1.83O6 | 6.06<br>(gm)         | density<br>(J)        | =<br>H                | =<br>-77116.31           | 3.29<br>(J)         | (gm/cc)          | (analysis      | in       | mole          | %)            |             |              |                    |            |          |             |            |       |
|                 | diopside<br>43.4                                  | =<br>clinoenstatit<br>14.79                                | -93986.56<br>(J)     | hedenbergite<br>23.48 | alumino-buffo<br>10.7 | =<br>buffonite<br>-5.6   | essenite<br>11.83   | jadeite<br>1.4   | S              | =        | 13.19         | (J/K)         | V           | =            | 1.84               | (cc)       | Cp       | =           | 6.99       | (J/K) |
| feldspar        | mass<br>K0.00Na0.17Ca0.83Al1.83Si2.17O8           | =<br>G                                                     | 14.25<br>(gm)        | density<br>(J)        | =<br>H                | =<br>-199729.57          | 2.69<br>(J)         | (gm/cc)          | (analysis      | in       | mole          | %)            |             |              |                    |            |          |             |            |       |
|                 | albite<br>16.84                                   | =<br>anorthite<br>82.83                                    | -240976.56<br>(J)    | sanidine<br>0.34      |                       |                          |                     |                  | S              | =        | 32.26         | (J/K)         | V           | =            | 5.29               | (cc)       | Cp       | =           | 17.23      | (J/K) |
| Viscosity       | of                                                | the                                                        | System:              | 3.81                  | (log                  | 10                       | poise)              |                  |                |          |               |               |             |              |                    |            |          |             |            |       |
| System          | mass<br>G                                         | =<br>=                                                     | 99.36<br>-1614166.46 | (gm)<br>(J)           | density<br>H          | =<br>=                   | 2.38<br>-1276086.79 | (gm/cc)<br>(J)   | S              | =        | 264.41        | (J/K)         | V           | =            | 41.73              | (cc)       | Cp       | =           | 137.29     | (J/K) |
| Oxygen          | delta<br>G                                        | moles<br>=                                                 | =<br>-99.6           | 0.000343466<br>(J)    | delta<br>H            | grams<br>=               | =<br>11.18          | 0.0109905<br>(J) | S              | =        | 0.09          | (J/K)         | V           | =            | 36.51              | (cc)       | Cp       | =           | 0.01       | (J/K) |
| *****-----***** |                                                   |                                                            |                      |                       |                       |                          |                     |                  |                |          |               |               |             |              |                    |            |          |             |            |       |
| Model 828 Bokan |                                                   |                                                            |                      |                       |                       |                          |                     |                  |                |          |               |               |             |              |                    |            |          |             |            |       |
| Temp (oC)       | =                                                 | 1000.47                                                    |                      |                       |                       |                          |                     |                  |                |          |               |               |             |              |                    |            |          |             |            |       |
| Constraint      | Flags:                                            | fO2                                                        | path                 | =                     | QFM                   | Fractionate              | Solids              |                  |                |          |               |               |             |              |                    |            |          |             |            |       |
| Liquid          | mass<br>G                                         | =<br>=                                                     | 74.4<br>-1204486.59  | (gm)<br>(J)           | density<br>H          | =<br>=                   | 2.34<br>-942924.11  | (gm/cc)<br>(J)   | viscosity<br>S | =<br>=   | 3.4<br>205.37 | (log<br>(J/K) | 10<br>V     | poise)<br>=  | (analysis<br>31.73 | in<br>(cc) | wt<br>Cp | %<br>=      | 106.42     | (J/K) |
|                 | SiO2<br>56.02                                     | =<br>TiO2<br>0.6                                           | Al2O3<br>17.88       | Fe2O3<br>1.42         | Cr2O3<br>0            | FeO<br>6.53              | MnO<br>0.3          | MgO<br>2.1       | NiO<br>0       | CoO<br>0 | CaO<br>5.92   | Na2O<br>3.71  | K2O<br>1.61 | P2O5<br>0.28 | H2O<br>3.64        | CO2<br>0   | SO3<br>0 | Cl2O-1<br>0 | F2O-1<br>0 |       |
| cpx             | mass<br>cpx<br>G                                  | =<br>Na0.02Ca0.79Fe"0.28Mg0.76Fe""0.06Ti0.02Al0.23Si1.84O6 | 0.65<br>(gm)         | density<br>(J)        | =<br>H                | =<br>-8166.1             | 3.31<br>(J)         | (gm/cc)          | (analysis      | in       | mole          | %)            |             |              |                    |            |          |             |            |       |
|                 | diopside<br>34.69                                 | =<br>clinoenstatit<br>19.35                                | -9964.87<br>(J)      | hedenbergite<br>28.3  | alumino-buffo<br>9.88 | =<br>buffonite<br>-5.11  | essenite<br>11.32   | jadeite<br>1.57  | S              | =        | 1.41          | (J/K)         | V           | =            | 0.2                | (cc)       | Cp       | =           | 0.75       | (J/K) |
| feldspar        | mass<br>K0.00Na0.23Ca0.76Al1.76Si2.24O8           | =<br>G                                                     | 1.31<br>(gm)         | density<br>(J)        | =<br>H                | =<br>-18309.4            | 2.68<br>(J)         | (gm/cc)          | (analysis      | in       | mole          | %)            |             |              |                    |            |          |             |            |       |
|                 | albite<br>23.07                                   | =<br>anorthite<br>76.45                                    | -22090.61<br>(J)     | sanidine<br>0.48      |                       |                          |                     |                  | S              | =        | 2.97          | (J/K)         | V           | =            | 0.49               | (cc)       | Cp       | =           | 1.58       | (J/K) |
| spinel          | mass<br>Fe"1.09Mg0.22Fe""1.12Al0.26Cr0.00Ti0.31O4 | =<br>G                                                     | 0.41<br>(gm)         | density<br>(J)        | =<br>H                | =<br>-2332.25            | 4.7<br>(J)          | (gm/cc)          | (analysis      | in       | mole          | %)            |             |              |                    |            |          |             |            |       |
|                 | chromite<br>0                                     | =<br>hercynite<br>-8.32                                    | -3399.23<br>(J)      | magnetite<br>56.12    | spinel<br>21.52       | =<br>ulvospinel<br>30.68 |                     |                  | S              | =        | 0.84          | (J/K)         | V           | =            | 0.09               | (cc)       | Cp       | =           | 0.38       | (J/K) |
| water           | mass<br>H2O<br>G                                  | =<br>=                                                     | 0.29<br>-7055.97     | (gm)<br>(J)           | density<br>H          | =<br>=                   | 0.18<br>-3345.28    | (gm/cc)<br>(J)   |                | =        | 2.91          | (J/K)         | V           | =            | 1.64               | (cc)       | Cp       | =           | 0.9        | (J/K) |
| Total           | solids<br>G                                       | mass<br>=                                                  | =<br>-42510.68       | 2.66<br>(J)           | (gm)<br>H             | density<br>=             | =<br>-32153.02      | 1.1<br>(J)       | (gm/cc)<br>S   | =        | 8.13          | (J/K)         | V           | =            | 2.41               | (cc)       | Cp       | =           | 3.61       | (J/K) |

|                 |                                 |                          |                      |                          |            |             |             |           |           |     |        |       |      |        |           |      |     |        |        |       |
|-----------------|---------------------------------|--------------------------|----------------------|--------------------------|------------|-------------|-------------|-----------|-----------|-----|--------|-------|------|--------|-----------|------|-----|--------|--------|-------|
| Summary         | of                              | all                      | fractionated phases: |                          | (total     | mass        | =           | 22.32     | grams)    |     |        |       |      |        |           |      |     |        |        |       |
| cpx             | mass                            | =                        | 6.77                 | (gm)                     | density    | =           | 3.3         | (gm/cc)   | (analysis | in  | mole   | %)    |      |        |           |      |     |        |        |       |
|                 | cpx                             | Na0.01Ca0.83Fe"          | 0.24Mg0.75Fe"        | 0.06Ti0.03Al0.24Si1.83O6 |            |             |             |           |           |     |        |       |      |        |           |      |     |        |        |       |
|                 | G                               | =                        | -104693.31           | (J)                      | H          | =           | -85982.94   | (J)       | S         | =   | 14.69  | (J/K) | V    | =      | 2.05      | (cc) | Cp  | =      | 7.79   | (J/K) |
|                 | diopside                        | clinoenstatit            | hedenbergite         | alumino-buffo            | buffonite  | essenite    | jadeite     |           |           |     |        |       |      |        |           |      |     |        |        |       |
|                 | 42.68                           | 15.11                    | 23.87                | 10.68                    | -5.55      | 11.8        | 1.41        |           |           |     |        |       |      |        |           |      |     |        |        |       |
| feldspar        | mass                            | =                        | 15.38                | (gm)                     | density    | =           | 2.69        | (gm/cc)   | (analysis | in  | mole   | %)    |      |        |           |      |     |        |        |       |
|                 | K0.00Na0.17Ca0.82Al1.82Si2.18O8 |                          |                      |                          |            |             |             |           |           |     |        |       |      |        |           |      |     |        |        |       |
|                 | G                               | =                        | -259948.4            | (J)                      | H          | =           | -215676.9   | (J)       | S         | =   | 34.76  | (J/K) | V    | =      | 5.71      | (cc) | Cp  | =      | 18.59  | (J/K) |
|                 | albite                          | anorthite                | sanidine             |                          |            |             |             |           |           |     |        |       |      |        |           |      |     |        |        |       |
|                 | 17.2                            | 82.45                    | 0.35                 |                          |            |             |             |           |           |     |        |       |      |        |           |      |     |        |        |       |
| spinel          | mass                            | =                        | 0.17                 | (gm)                     | density    | =           | 4.69        | (gm/cc)   | (analysis | in  | mole   | %)    |      |        |           |      |     |        |        |       |
|                 | Fe"1.09Mg0.22Fe"                | 1.10Al0.27Cr0.00Ti0.32O4 |                      |                          |            |             |             |           |           |     |        |       |      |        |           |      |     |        |        |       |
|                 | G                               | =                        | -1423.89             | (J)                      | H          | =           | -978.61     | (J)       | S         | =   | 0.35   | (J/K) | V    | =      | 0.04      | (cc) | Cp  | =      | 0.16   | (J/K) |
|                 | chromite                        | hercynite                | magnetite            | spinel                   | ulvospinel |             |             |           |           |     |        |       |      |        |           |      |     |        |        |       |
|                 | 0                               | -8.84                    | 55.13                | 22.11                    | 31.6       |             |             |           |           |     |        |       |      |        |           |      |     |        |        |       |
| Viscosity       | of                              | the                      | System:              |                          | 3.98       | (log        | 10          | poise)    |           |     |        |       |      |        |           |      |     |        |        |       |
| System          | mass                            | =                        | 99.37                | (gm)                     | density    | =           | 2.37        | (gm/cc)   |           |     |        |       |      |        |           |      |     |        |        |       |
|                 | G                               | =                        | -1613062.87          | (J)                      | H          | =           | -1277715.57 | (J)       | S         | =   | 263.3  | (J/K) | V    | =      | 41.95     | (cc) | Cp  | =      | 136.57 | (J/K) |
| Oxygen          | delta                           | moles                    | =                    | 0.000733376              | delta      | grams       | =           | 0.0234672 |           |     |        |       |      |        |           |      |     |        |        |       |
|                 | G                               | =                        | -211.74              | (J)                      | H          | =           | 23.75       | (J)       | S         | =   | 0.18   | (J/K) | V    | =      | 77.66     | (cc) | Cp  | =      | 0.03   | (J/K) |
| *****-----***** |                                 |                          |                      |                          |            |             |             |           |           |     |        |       |      |        |           |      |     |        |        |       |
| Model 828 Bokan |                                 |                          |                      |                          |            |             |             |           |           |     |        |       |      |        |           |      |     |        |        |       |
| Temp (oC)       | =                               | 995.47                   |                      |                          |            |             |             |           |           |     |        |       |      |        |           |      |     |        |        |       |
| Constraint      | Flags:                          | fO2                      | path                 | =                        | QFM        | Fractionate | Solids      |           |           |     |        |       |      |        |           |      |     |        |        |       |
| Liquid          | mass                            | =                        | 71.45                | (gm)                     | density    | =           | 2.34        | (gm/cc)   | viscosity | =   | 3.48   | (log  | 10   | poise) | (analysis | in   | wt  | %)     |        |       |
|                 | G                               | =                        | -1157669.69          | (J)                      | H          | =           | -907731.03  | (J)       | S         | =   | 197.02 | (J/K) | V    | =      | 30.57     | (cc) | Cp  | =      | 102.01 | (J/K) |
|                 | SiO2                            | TiO2                     | Al2O3                | Fe2O3                    | Cr2O3      | FeO         | MnO         | MgO       | NiO       | CoO | CaO    | Na2O  | K2O  | P2O5   | H2O       | CO2  | SO3 | Cl2O-1 | F2O-1  |       |
|                 | 56.6                            | 0.56                     | 17.7                 | 1.39                     | 0          | 6.31        | 0.31        | 1.97      | 0         | 0   | 5.73   | 3.79  | 1.68 | 0.29   | 3.67      | 0    | 0   | 0      | 0      |       |
| opx             | mass                            | =                        | 0.56                 | (gm)                     | density    | =           | 3.37        | (gm/cc)   | (analysis | in  | mole   | %)    |      |        |           |      |     |        |        |       |
|                 | opx                             | Na0.00Ca0.07Fe"          | 0.60Mg1.26Fe"        | 0.02Ti0.00Al0.11Si1.93O6 |            |             |             |           |           |     |        |       |      |        |           |      |     |        |        |       |
|                 | G                               | =                        | -8294                | (J)                      | H          | =           | -6714.11    | (J)       | S         | =   | 1.25   | (J/K) | V    | =      | 0.17      | (cc) | Cp  | =      | 0.67   | (J/K) |
|                 | diopside                        | clinoenstatit            | hedenbergite         | alumino-buffo            | buffonite  | essenite    | jadeite     |           |           |     |        |       |      |        |           |      |     |        |        |       |
|                 | -59.8                           | 93                       | 59.88                | 4.38                     | -3.98      | 6.4         | 0.13        |           |           |     |        |       |      |        |           |      |     |        |        |       |
| cpx             | mass                            | =                        | 0.03                 | (gm)                     | density    | =           | 3.31        | (gm/cc)   | (analysis | in  | mole   | %)    |      |        |           |      |     |        |        |       |
|                 | cpx                             | Na0.02Ca0.79Fe"          | 0.29Mg0.76Fe"        | 0.06Ti0.02Al0.22Si1.84O6 |            |             |             |           |           |     |        |       |      |        |           |      |     |        |        |       |
|                 | G                               | =                        | -439.31              | (J)                      | H          | =           | -360.32     | (J)       | S         | =   | 0.06   | (J/K) | V    | =      | 0.01      | (cc) | Cp  | =      | 0.03   | (J/K) |
|                 | diopside                        | clinoenstatit            | hedenbergite         | alumino-buffo            | buffonite  | essenite    | jadeite     |           |           |     |        |       |      |        |           |      |     |        |        |       |
|                 | 33.98                           | 19.75                    | 29.05                | 9.48                     | -5.01      | 11.14       | 1.61        |           |           |     |        |       |      |        |           |      |     |        |        |       |
| feldspar        | mass                            | =                        | 1.89                 | (gm)                     | density    | =           | 2.68        | (gm/cc)   | (analysis | in  | mole   | %)    |      |        |           |      |     |        |        |       |
|                 | K0.01Na0.24Ca0.75Al1.75Si2.25O8 |                          |                      |                          |            |             |             |           |           |     |        |       |      |        |           |      |     |        |        |       |
|                 | G                               | =                        | -31936.47            | (J)                      | H          | =           | -26493.09   | (J)       | S         | =   | 4.29   | (J/K) | V    | =      | 0.71      | (cc) | Cp  | =      | 2.29   | (J/K) |
|                 | albite                          | anorthite                | sanidine             |                          |            |             |             |           |           |     |        |       |      |        |           |      |     |        |        |       |
|                 | 24.4                            | 75.08                    | 0.51                 |                          |            |             |             |           |           |     |        |       |      |        |           |      |     |        |        |       |
| spinel          | mass                            | =                        | 0.39                 | (gm)                     | density    | =           | 4.71        | (gm/cc)   | (analysis | in  | mole   | %)    |      |        |           |      |     |        |        |       |
|                 | Fe"1.10Mg0.21Fe"                | 1.14Al0.26Cr0.00Ti0.30O4 |                      |                          |            |             |             |           |           |     |        |       |      |        |           |      |     |        |        |       |
|                 | G                               | =                        | -3191.18             | (J)                      | H          | =           | -2188.6     | (J)       | S         | =   | 0.79   | (J/K) | V    | =      | 0.08      | (cc) | Cp  | =      | 0.36   | (J/K) |

|                 |                                                        |                                                                              |                       |                        |                     |                   |                     |                  |                |             |                 |               |             |                  |                    |             |                 |                |                |
|-----------------|--------------------------------------------------------|------------------------------------------------------------------------------|-----------------------|------------------------|---------------------|-------------------|---------------------|------------------|----------------|-------------|-----------------|---------------|-------------|------------------|--------------------|-------------|-----------------|----------------|----------------|
|                 | chromite<br>0                                          | hercynite<br>-7.76                                                           | magnetite<br>57.03    | spinel<br>20.59        | ulvospinel<br>30.13 |                   |                     |                  |                |             |                 |               |             |                  |                    |             |                 |                |                |
| water           | mass<br>H2O<br>G                                       | =<br>=<br>=                                                                  | 0.38<br>-9255.04      | (gm)<br>(J)            | density<br>H        | =<br>=<br>=       | 0.18<br>-4402.85    | (gm/cc)<br>(J)   | S              | =<br>=<br>= | 3.82<br>(J/K)   | V             | =<br>=<br>= | 2.15<br>(cc)     | Cp                 | =<br>=<br>= | 1.18<br>(J/K)   |                |                |
| Total           | solids<br>G                                            | mass<br>=<br>=                                                               | =<br>-53115.99        | 3.25<br>(J)            | (gm)<br>H           | density<br>=<br>= | =<br>-40158.96      | 1.04<br>(J)      | (gm/cc)<br>S   | =<br>=<br>= | 10.21<br>(J/K)  | V             | =<br>=<br>= | 3.11<br>(cc)     | Cp                 | =<br>=<br>= | 4.54<br>(J/K)   |                |                |
| Summary         | of                                                     | all                                                                          | fractionated          | phases:                | (total              | mass              | =                   | 24.68            | grams)         |             |                 |               |             |                  |                    |             |                 |                |                |
| cpx             | mass<br>cpx<br>G                                       | =<br>Na0.01Ca0.83Fe"0.24Mg0.75Fe""0.06Ti0.03Al0.24Si1.83O6<br>=<br>-114543.4 | (gm)<br>(J)           | density<br>H           | =<br>=<br>=         | 3.3<br>-94163.34  | (gm/cc)<br>(J)      | (analysis<br>S   | in             | mole        | %               |               |             |                  |                    |             |                 |                |                |
|                 | diopside<br>41.98                                      | clinoenstatit<br>15.48                                                       | hedenbergite<br>24.26 | alumino-buffo<br>10.61 | buffonite<br>-5.51  | essenite<br>11.75 | jadeite<br>1.43     |                  | =              | 16.06       | (J/K)           | V             | =           | 2.25             | (cc)               | Cp          | =               | 8.53<br>(J/K)  |                |
| feldspar        | mass<br>K0.00Na0.18Ca0.82Al1.82Si2.18O8<br>G           | =<br>=<br>=                                                                  | 16.68<br>-281804.54   | (gm)<br>(J)            | density<br>H        | =<br>=<br>=       | 2.69<br>-234048.46  | (gm/cc)<br>(J)   | (analysis<br>S | in          | mole            | %             |             |                  |                    |             |                 |                |                |
|                 | albite<br>17.66                                        | anorthite<br>81.98                                                           | sanidine<br>0.36      |                        |                     |                   |                     |                  | =              | 37.64       | (J/K)           | V             | =           | 6.2              | (cc)               | Cp          | =               | 20.15<br>(J/K) |                |
| spinel          | mass<br>Fe"1.09Mg0.22Fe""1.12Al0.26Cr0.00Ti0.31O4<br>G | =<br>=<br>=                                                                  | 0.58<br>-4799.52      | (gm)<br>(J)            | density<br>H        | =<br>=<br>=       | 4.69<br>-3301.42    | (gm/cc)<br>(J)   | (analysis<br>S | in          | mole            | %             |             |                  |                    |             |                 |                |                |
|                 | chromite<br>0                                          | hercynite<br>-8.47                                                           | magnetite<br>55.83    | spinel<br>21.69        | ulvospinel<br>30.95 |                   |                     |                  | =              | 1.18        | (J/K)           | V             | =           | 0.12             | (cc)               | Cp          | =               | 0.54<br>(J/K)  |                |
| Viscosity       | of                                                     | the                                                                          | System:               | 4.18                   | (log                | 10                | poise)              |                  |                |             |                 |               |             |                  |                    |             |                 |                |                |
| System          | mass<br>G                                              | =<br>=<br>=                                                                  | 99.38<br>-1611933.14  | (gm)<br>(J)            | density<br>H        | =<br>=<br>=       | 2.35<br>-1279403.22 | (gm/cc)<br>(J)   | S              | =<br>=<br>= | 262.12<br>(J/K) | V             | =<br>=<br>= | 42.25<br>(cc)    | Cp                 | =<br>=<br>= | 135.78<br>(J/K) |                |                |
| Oxygen          | delta<br>G                                             | moles<br>=<br>=                                                              | =<br>-306.37          | 0.0010658<br>(J)       | delta<br>H          | grams<br>=<br>=   | =<br>34.32          | 0.0341042<br>(J) | S              | =<br>=<br>= | 0.27<br>(J/K)   | V             | =<br>=<br>= | 112.42<br>(cc)   | Cp                 | =<br>=<br>= | 0.04<br>(J/K)   |                |                |
| *****-----***** |                                                        |                                                                              |                       |                        |                     |                   |                     |                  |                |             |                 |               |             |                  |                    |             |                 |                |                |
| Model 828 Bokan |                                                        |                                                                              |                       |                        |                     |                   |                     |                  |                |             |                 |               |             |                  |                    |             |                 |                |                |
| Temp (oC)       | =                                                      | 990.47                                                                       |                       |                        |                     |                   |                     |                  |                |             |                 |               |             |                  |                    |             |                 |                |                |
| Constraint      | Flags:                                                 | fO2                                                                          | path                  | =                      | QFM                 | Fractionate       | Solids              |                  |                |             |                 |               |             |                  |                    |             |                 |                |                |
| Liquid          | mass<br>G                                              | =<br>=<br>=                                                                  | 68.61<br>-1112342.93  | (gm)<br>(J)            | density<br>H        | =<br>=<br>=       | 2.33<br>-873588.66  | (gm/cc)<br>(J)   | viscosity<br>S | =<br>=<br>= | 3.56<br>188.94  | (log<br>(J/K) | 10<br>V     | poise)<br>=<br>= | (analysis<br>29.44 | in<br>(cc)  | wt<br>Cp        | %<br>=<br>=    | 97.75<br>(J/K) |
|                 | SiO2<br>57.17                                          | TiO2<br>0.53                                                                 | Al2O3<br>17.52        | Fe2O3<br>1.36          | Cr2O3<br>0          | FeO<br>6.09       | MnO<br>0.32         | MgO<br>1.84      | NiO<br>0       | CoO<br>0    | CaO<br>5.56     | Na2O<br>3.87  | K2O<br>1.74 | P2O5<br>0.31     | H2O<br>3.69        | CO2<br>0    | SO3<br>0        | Cl2O-1<br>0    | F2O-1<br>0     |
| opx             | mass<br>opx<br>G                                       | =<br>Na0.00Ca0.07Fe"0.61Mg1.25Fe""0.02Ti0.00Al0.11Si1.93O6<br>=<br>-8662.63  | (gm)<br>(J)           | density<br>H           | =<br>=<br>=         | 3.37<br>-7017.19  | (gm/cc)<br>(J)      | (analysis<br>S   | in             | mole        | %               |               |             |                  |                    |             |                 |                |                |
|                 | diopside<br>-61.22                                     | clinoenstatit<br>93.06                                                       | hedenbergite<br>61.33 | alumino-buffo<br>4.3   | buffonite<br>-3.92  | essenite<br>6.33  | jadeite<br>0.13     |                  | =              | 1.3         | (J/K)           | V             | =           | 0.17             | (cc)               | Cp          | =               | 0.71<br>(J/K)  |                |
| feldspar        | mass<br>K0.01Na0.26Ca0.74Al1.74Si2.26O8<br>G           | =<br>=<br>=                                                                  | 1.83<br>-30947.5      | (gm)<br>(J)            | density<br>H        | =<br>=<br>=       | 2.67<br>-25694.86   | (gm/cc)<br>(J)   | (analysis<br>S | in          | mole            | %             |             |                  |                    |             |                 |                |                |
|                 | albite<br>25.81                                        | anorthite<br>73.64                                                           | sanidine<br>0.55      |                        |                     |                   |                     |                  | =              | 4.16        | (J/K)           | V             | =           | 0.69             | (cc)               | Cp          | =               | 2.22<br>(J/K)  |                |

|           |                                           |     |              |         |         |      |            |         |           |    |       |       |   |   |      |      |    |   |       |       |
|-----------|-------------------------------------------|-----|--------------|---------|---------|------|------------|---------|-----------|----|-------|-------|---|---|------|------|----|---|-------|-------|
| spinel    | mass                                      | =   | 0.35         | (gm)    | density | =    | 4.72       | (gm/cc) | (analysis | in | mole  | %)    |   |   |      |      |    |   |       |       |
|           | Fe"1.10Mg0.20Fe""1.16Al0.25Cr0.00Ti0.30O4 |     |              |         |         |      |            |         |           |    |       |       |   |   |      |      |    |   |       |       |
|           | G                                         | =   | -2865.85     | (J)     | H       | =    | -1964.58   | (J)     | S         | =  | 0.71  | (J/K) | V | = | 0.07 | (cc) | Cp | = | 0.33  | (J/K) |
|           | chromite                                  | =   | -2865.85     | (J)     | H       | =    | -1964.58   | (J)     | S         | =  | 0.71  | (J/K) | V | = | 0.07 | (cc) | Cp | = | 0.33  | (J/K) |
|           | 0                                         | =   | -2865.85     | (J)     | H       | =    | -1964.58   | (J)     | S         | =  | 0.71  | (J/K) | V | = | 0.07 | (cc) | Cp | = | 0.33  | (J/K) |
|           | hercynite                                 | =   | -2865.85     | (J)     | H       | =    | -1964.58   | (J)     | S         | =  | 0.71  | (J/K) | V | = | 0.07 | (cc) | Cp | = | 0.33  | (J/K) |
|           | -7.15                                     | =   | -2865.85     | (J)     | H       | =    | -1964.58   | (J)     | S         | =  | 0.71  | (J/K) | V | = | 0.07 | (cc) | Cp | = | 0.33  | (J/K) |
|           | magnetite                                 | =   | -2865.85     | (J)     | H       | =    | -1964.58   | (J)     | S         | =  | 0.71  | (J/K) | V | = | 0.07 | (cc) | Cp | = | 0.33  | (J/K) |
|           | 57.9                                      | =   | -2865.85     | (J)     | H       | =    | -1964.58   | (J)     | S         | =  | 0.71  | (J/K) | V | = | 0.07 | (cc) | Cp | = | 0.33  | (J/K) |
|           | 19.62                                     | =   | -2865.85     | (J)     | H       | =    | -1964.58   | (J)     | S         | =  | 0.71  | (J/K) | V | = | 0.07 | (cc) | Cp | = | 0.33  | (J/K) |
|           | 29.63                                     | =   | -2865.85     | (J)     | H       | =    | -1964.58   | (J)     | S         | =  | 0.71  | (J/K) | V | = | 0.07 | (cc) | Cp | = | 0.33  | (J/K) |
| water     | mass                                      | =   | 0.47         | (gm)    | density | =    | 0.18       | (gm/cc) |           |    |       |       |   |   |      |      |    |   |       |       |
|           | H2O                                       | =   | 0.47         | (gm)    | density | =    | 0.18       | (gm/cc) |           |    |       |       |   |   |      |      |    |   |       |       |
|           | G                                         | =   | -11398.7     | (J)     | H       | =    | -5441.15   | (J)     | S         | =  | 4.71  | (J/K) | V | = | 2.63 | (cc) | Cp | = | 1.46  | (J/K) |
| Total     | solids                                    | =   | 3.24         | (gm)    | density | =    | 0.91       | (gm/cc) |           |    |       |       |   |   |      |      |    |   |       |       |
|           | G                                         | =   | -53874.67    | (J)     | H       | =    | -40117.79  | (J)     | S         | =  | 10.89 | (J/K) | V | = | 3.57 | (cc) | Cp | = | 4.71  | (J/K) |
| Summary   | of                                        | all | fractionated | phases: | (total  | mass | =          | 27.54   | grams)    |    |       |       |   |   |      |      |    |   |       |       |
| opx       | mass                                      | =   | 0.56         | (gm)    | density | =    | 3.37       | (gm/cc) | (analysis | in | mole  | %)    |   |   |      |      |    |   |       |       |
|           | opx                                       | =   | 0.56         | (gm)    | density | =    | 3.37       | (gm/cc) | (analysis | in | mole  | %)    |   |   |      |      |    |   |       |       |
|           | G                                         | =   | -8255.12     | (J)     | H       | =    | -6691      | (J)     | S         | =  | 1.24  | (J/K) | V | = | 0.17 | (cc) | Cp | = | 0.67  | (J/K) |
|           | diopside                                  | =   | -8255.12     | (J)     | H       | =    | -6691      | (J)     | S         | =  | 1.24  | (J/K) | V | = | 0.17 | (cc) | Cp | = | 0.67  | (J/K) |
|           | -59.8                                     | =   | -8255.12     | (J)     | H       | =    | -6691      | (J)     | S         | =  | 1.24  | (J/K) | V | = | 0.17 | (cc) | Cp | = | 0.67  | (J/K) |
|           | clinoenstatit                             | =   | -8255.12     | (J)     | H       | =    | -6691      | (J)     | S         | =  | 1.24  | (J/K) | V | = | 0.17 | (cc) | Cp | = | 0.67  | (J/K) |
|           | 93                                        | =   | -8255.12     | (J)     | H       | =    | -6691      | (J)     | S         | =  | 1.24  | (J/K) | V | = | 0.17 | (cc) | Cp | = | 0.67  | (J/K) |
|           | hedenbergite                              | =   | -8255.12     | (J)     | H       | =    | -6691      | (J)     | S         | =  | 1.24  | (J/K) | V | = | 0.17 | (cc) | Cp | = | 0.67  | (J/K) |
|           | 59.88                                     | =   | -8255.12     | (J)     | H       | =    | -6691      | (J)     | S         | =  | 1.24  | (J/K) | V | = | 0.17 | (cc) | Cp | = | 0.67  | (J/K) |
|           | 4.38                                      | =   | -8255.12     | (J)     | H       | =    | -6691      | (J)     | S         | =  | 1.24  | (J/K) | V | = | 0.17 | (cc) | Cp | = | 0.67  | (J/K) |
|           | alumino-buffo                             | =   | -8255.12     | (J)     | H       | =    | -6691      | (J)     | S         | =  | 1.24  | (J/K) | V | = | 0.17 | (cc) | Cp | = | 0.67  | (J/K) |
|           | buffonite                                 | =   | -8255.12     | (J)     | H       | =    | -6691      | (J)     | S         | =  | 1.24  | (J/K) | V | = | 0.17 | (cc) | Cp | = | 0.67  | (J/K) |
|           | -3.98                                     | =   | -8255.12     | (J)     | H       | =    | -6691      | (J)     | S         | =  | 1.24  | (J/K) | V | = | 0.17 | (cc) | Cp | = | 0.67  | (J/K) |
|           | 6.4                                       | =   | -8255.12     | (J)     | H       | =    | -6691      | (J)     | S         | =  | 1.24  | (J/K) | V | = | 0.17 | (cc) | Cp | = | 0.67  | (J/K) |
|           | essenite                                  | =   | -8255.12     | (J)     | H       | =    | -6691      | (J)     | S         | =  | 1.24  | (J/K) | V | = | 0.17 | (cc) | Cp | = | 0.67  | (J/K) |
|           | jadeite                                   | =   | -8255.12     | (J)     | H       | =    | -6691      | (J)     | S         | =  | 1.24  | (J/K) | V | = | 0.17 | (cc) | Cp | = | 0.67  | (J/K) |
|           | 0.13                                      | =   | -8255.12     | (J)     | H       | =    | -6691      | (J)     | S         | =  | 1.24  | (J/K) | V | = | 0.17 | (cc) | Cp | = | 0.67  | (J/K) |
| cpx       | mass                                      | =   | 7.44         | (gm)    | density | =    | 3.3        | (gm/cc) | (analysis | in | mole  | %)    |   |   |      |      |    |   |       |       |
|           | cpx                                       | =   | 7.44         | (gm)    | density | =    | 3.3        | (gm/cc) | (analysis | in | mole  | %)    |   |   |      |      |    |   |       |       |
|           | G                                         | =   | -114867.77   | (J)     | H       | =    | -94538.24  | (J)     | S         | =  | 16.09 | (J/K) | V | = | 2.26 | (cc) | Cp | = | 8.56  | (J/K) |
|           | diopside                                  | =   | -114867.77   | (J)     | H       | =    | -94538.24  | (J)     | S         | =  | 16.09 | (J/K) | V | = | 2.26 | (cc) | Cp | = | 8.56  | (J/K) |
|           | 41.95                                     | =   | -114867.77   | (J)     | H       | =    | -94538.24  | (J)     | S         | =  | 16.09 | (J/K) | V | = | 2.26 | (cc) | Cp | = | 8.56  | (J/K) |
|           | clinoenstatit                             | =   | -114867.77   | (J)     | H       | =    | -94538.24  | (J)     | S         | =  | 16.09 | (J/K) | V | = | 2.26 | (cc) | Cp | = | 8.56  | (J/K) |
|           | 15.49                                     | =   | -114867.77   | (J)     | H       | =    | -94538.24  | (J)     | S         | =  | 16.09 | (J/K) | V | = | 2.26 | (cc) | Cp | = | 8.56  | (J/K) |
|           | hedenbergite                              | =   | -114867.77   | (J)     | H       | =    | -94538.24  | (J)     | S         | =  | 16.09 | (J/K) | V | = | 2.26 | (cc) | Cp | = | 8.56  | (J/K) |
|           | 24.27                                     | =   | -114867.77   | (J)     | H       | =    | -94538.24  | (J)     | S         | =  | 16.09 | (J/K) | V | = | 2.26 | (cc) | Cp | = | 8.56  | (J/K) |
|           | 10.61                                     | =   | -114867.77   | (J)     | H       | =    | -94538.24  | (J)     | S         | =  | 16.09 | (J/K) | V | = | 2.26 | (cc) | Cp | = | 8.56  | (J/K) |
|           | alumino-buffo                             | =   | -114867.77   | (J)     | H       | =    | -94538.24  | (J)     | S         | =  | 16.09 | (J/K) | V | = | 2.26 | (cc) | Cp | = | 8.56  | (J/K) |
|           | buffonite                                 | =   | -114867.77   | (J)     | H       | =    | -94538.24  | (J)     | S         | =  | 16.09 | (J/K) | V | = | 2.26 | (cc) | Cp | = | 8.56  | (J/K) |
|           | -5.51                                     | =   | -114867.77   | (J)     | H       | =    | -94538.24  | (J)     | S         | =  | 16.09 | (J/K) | V | = | 2.26 | (cc) | Cp | = | 8.56  | (J/K) |
|           | 11.75                                     | =   | -114867.77   | (J)     | H       | =    | -94538.24  | (J)     | S         | =  | 16.09 | (J/K) | V | = | 2.26 | (cc) | Cp | = | 8.56  | (J/K) |
|           | jadeite                                   | =   | -114867.77   | (J)     | H       | =    | -94538.24  | (J)     | S         | =  | 16.09 | (J/K) | V | = | 2.26 | (cc) | Cp | = | 8.56  | (J/K) |
|           | 1.43                                      | =   | -114867.77   | (J)     | H       | =    | -94538.24  | (J)     | S         | =  | 16.09 | (J/K) | V | = | 2.26 | (cc) | Cp | = | 8.56  | (J/K) |
| feldspar  | mass                                      | =   | 18.57        | (gm)    | density | =    | 2.69       | (gm/cc) | (analysis | in | mole  | %)    |   |   |      |      |    |   |       |       |
|           | K0.00Na0.18Ca0.81Al1.81Si2.19O8           |     |              |         |         |      |            |         |           |    |       |       |   |   |      |      |    |   |       |       |
|           | G                                         | =   | -313485.87   | (J)     | H       | =    | -260614.95 | (J)     | S         | =  | 41.84 | (J/K) | V | = | 6.91 | (cc) | Cp | = | 22.43 | (J/K) |
|           | albite                                    | =   | -313485.87   | (J)     | H       | =    | -260614.95 | (J)     | S         | =  | 41.84 | (J/K) | V | = | 6.91 | (cc) | Cp | = | 22.43 | (J/K) |
|           | 18.35                                     | =   | -313485.87   | (J)     | H       | =    | -260614.95 | (J)     | S         | =  | 41.84 | (J/K) | V | = | 6.91 | (cc) | Cp | = | 22.43 | (J/K) |
|           | anorthite                                 | =   | -313485.87   | (J)     | H       | =    | -260614.95 | (J)     | S         | =  | 41.84 | (J/K) | V | = | 6.91 | (cc) | Cp | = | 22.43 | (J/K) |
|           | 81.28                                     | =   | -313485.87   | (J)     | H       | =    | -260614.95 | (J)     | S         | =  | 41.84 | (J/K) | V | = | 6.91 | (cc) | Cp | = | 22.43 | (J/K) |
|           | 0.37                                      | =   | -313485.87   | (J)     | H       | =    | -260614.95 | (J)     | S         | =  | 41.84 | (J/K) | V | = | 6.91 | (cc) | Cp | = | 22.43 | (J/K) |
| spinel    | mass                                      | =   | 0.97         | (gm)    | density | =    | 4.7        | (gm/cc) | (analysis | in | mole  | %)    |   |   |      |      |    |   |       |       |
|           | Fe"1.09Mg0.21Fe""1.13Al0.26Cr0.00Ti0.31O4 |     |              |         |         |      |            |         |           |    |       |       |   |   |      |      |    |   |       |       |
|           | G                                         | =   | -7963.3      | (J)     | H       | =    | -5482.46   | (J)     | S         | =  | 1.96  | (J/K) | V | = | 0.21 | (cc) | Cp | = | 0.9   | (J/K) |
|           | chromite                                  | =   | -7963.3      | (J)     | H       | =    | -5482.46   | (J)     | S         | =  | 1.96  | (J/K) | V | = | 0.21 | (cc) | Cp | = | 0.9   | (J/K) |
|           | 0                                         | =   | -7963.3      | (J)     | H       | =    | -5482.46   | (J)     | S         | =  | 1.96  | (J/K) | V | = | 0.21 | (cc) | Cp | = | 0.9   | (J/K) |
|           | hercynite                                 | =   | -7963.3      | (J)     | H       | =    | -5482.46   | (J)     | S         | =  | 1.96  | (J/K) | V | = | 0.21 | (cc) | Cp | = | 0.9   | (J/K) |
|           | -8.19                                     | =   | -7963.3      | (J)     | H       | =    | -5482.46   | (J)     | S         | =  | 1.96  | (J/K) | V | = | 0.21 | (cc) | Cp | = | 0.9   | (J/K) |
|           | magnetite                                 | =   | -7963.3      | (J)     | H       | =    | -5482.46   | (J)     | S         | =  | 1.96  | (J/K) | V | = | 0.21 | (cc) | Cp | = | 0.9   | (J/K) |
|           | 56.31                                     | =   | -7963.3      | (J)     | H       | =    | -5482.46   | (J)     | S         | =  | 1.96  | (J/K) | V | = | 0.21 | (cc) | Cp | = | 0.9   | (J/K) |
|           | 21.25                                     | =   | -7963.3      | (J)     | H       | =    | -5482.46   | (J)     | S         | =  | 1.96  | (J/K) | V | = | 0.21 | (cc) | Cp | = | 0.9   | (J/K) |
|           | ulvospinel                                | =   | -7963.3      | (J)     | H       | =    | -5482.46   | (J)     | S         | =  | 1.96  | (J/K) | V | = | 0.21 | (cc) | Cp | = | 0.9   | (J/K) |
|           | 30.62                                     | =   | -7963.3      | (J)     | H       | =    | -5482.46   | (J)     | S         | =  | 1.96  | (J/K) | V | = | 0.21 | (cc) | Cp | = | 0.9   | (J/K) |
| Viscosity | of                                        | the | System:      | 4.39    | (log    | 10   | poise)     |         |           |    |       |       |   |   |      |      |    |   |       |       |
| System    | mass                                      | =   | 99.39        | (gm)    | density | =    | 2.34       | (gm/cc) |           |    |       |       |   |   |      |      |    |   |       |       |



|                 |                                                       |               |              |               |            |             |             |           |           |    |        |       |   |   |        |      |    |   |        |       |  |  |
|-----------------|-------------------------------------------------------|---------------|--------------|---------------|------------|-------------|-------------|-----------|-----------|----|--------|-------|---|---|--------|------|----|---|--------|-------|--|--|
|                 | diopside                                              | clinoenstatit | hedenbergite | alumino-buffo | buffonite  | essenite    | jadeite     |           |           |    |        |       |   |   |        |      |    |   |        |       |  |  |
|                 | -62.67                                                | 93.14         | 62.78        | 4.22          | -3.88      | 6.28        | 0.13        |           |           |    |        |       |   |   |        |      |    |   |        |       |  |  |
| feldspar        | mass                                                  | =             | 1.69         | (gm)          | density    | =           | 2.67        | (gm/cc)   | (analysis | in | mole   | %)    |   |   |        |      |    |   |        |       |  |  |
|                 | K0.01Na0.27Ca0.72Al1.72Si2.28O8                       |               |              |               |            |             |             |           |           |    |        |       |   |   |        |      |    |   |        |       |  |  |
|                 | G                                                     | =             | -28537.5     | (J)           | H          | =           | -23714.28   | (J)       | S         | =  | 3.83   | (J/K) | V | = | 0.63   | (cc) | Cp | = | 2.05   | (J/K) |  |  |
|                 | albite                                                | anorthite     | sanidine     |               |            |             |             |           |           |    |        |       |   |   |        |      |    |   |        |       |  |  |
|                 | 27.25                                                 | 72.15         | 0.59         |               |            |             |             |           |           |    |        |       |   |   |        |      |    |   |        |       |  |  |
| spinel          | mass                                                  | =             | 0.32         | (gm)          | density    | =           | 4.73        | (gm/cc)   | (analysis | in | mole   | %)    |   |   |        |      |    |   |        |       |  |  |
|                 | Fe"1.10Mg0.19Fe""1.18Al0.24Cr0.00Ti0.29O4             |               |              |               |            |             |             |           |           |    |        |       |   |   |        |      |    |   |        |       |  |  |
|                 | G                                                     | =             | -2565.35     | (J)           | H          | =           | -1758.04    | (J)       | S         | =  | 0.64   | (J/K) | V | = | 0.07   | (cc) | Cp | = | 0.29   | (J/K) |  |  |
|                 | chromite                                              | hercynite     | magnetite    | spinel        | ulvospinel |             |             |           |           |    |        |       |   |   |        |      |    |   |        |       |  |  |
|                 | 0                                                     | -6.58         | 58.76        | 18.71         | 29.12      |             |             |           |           |    |        |       |   |   |        |      |    |   |        |       |  |  |
| water           | mass                                                  | =             | 0.55         | (gm)          | density    | =           | 0.18        | (gm/cc)   |           |    |        |       |   |   |        |      |    |   |        |       |  |  |
|                 | H2O                                                   |               |              |               |            |             |             |           |           |    |        |       |   |   |        |      |    |   |        |       |  |  |
|                 | G                                                     | =             | -13369.3     | (J)           | H          | =           | -6403.63    | (J)       | S         | =  | 5.53   | (J/K) | V | = | 3.08   | (cc) | Cp | = | 1.72   | (J/K) |  |  |
| Total           | solids                                                | mass          | =            | 3.08          | (gm)       | density     | =           | 0.78      | (gm/cc)   |    |        |       |   |   |        |      |    |   |        |       |  |  |
|                 | G                                                     | =             | -52105.18    | (J)           | H          | =           | -38063.27   | (J)       | S         | =  | 11.16  | (J/K) | V | = | 3.93   | (cc) | Cp | = | 4.68   | (J/K) |  |  |
| Summary         | of                                                    | all           | fractionated | phases:       | (total     | mass        | =           | 30.31     | grams)    |    |        |       |   |   |        |      |    |   |        |       |  |  |
| opx             | mass                                                  | =             | 1.15         | (gm)          | density    | =           | 3.37        | (gm/cc)   | (analysis | in | mole   | %)    |   |   |        |      |    |   |        |       |  |  |
|                 | Na0.00Ca0.07Fe"0.61Mg1.26Fe""0.02Ti0.00Al0.11Si1.93O6 |               |              |               |            |             |             |           |           |    |        |       |   |   |        |      |    |   |        |       |  |  |
|                 | opx                                                   | =             | -16872.47    | (J)           | H          | =           | -13688.64   | (J)       | S         | =  | 2.53   | (J/K) | V | = | 0.34   | (cc) | Cp | = | 1.37   | (J/K) |  |  |
|                 | diopside                                              | clinoenstatit | hedenbergite | alumino-buffo | buffonite  | essenite    | jadeite     |           |           |    |        |       |   |   |        |      |    |   |        |       |  |  |
|                 | -60.53                                                | 93.03         | 60.62        | 4.34          | -3.95      | 6.36        | 0.13        |           |           |    |        |       |   |   |        |      |    |   |        |       |  |  |
| cpx             | mass                                                  | =             | 7.44         | (gm)          | density    | =           | 3.3         | (gm/cc)   | (analysis | in | mole   | %)    |   |   |        |      |    |   |        |       |  |  |
|                 | Na0.01Ca0.83Fe"0.24Mg0.75Fe""0.06Ti0.03Al0.24Si1.83O6 |               |              |               |            |             |             |           |           |    |        |       |   |   |        |      |    |   |        |       |  |  |
|                 | cpx                                                   | =             | -114787.41   | (J)           | H          | =           | -94581.04   | (J)       | S         | =  | 16.05  | (J/K) | V | = | 2.26   | (cc) | Cp | = | 8.56   | (J/K) |  |  |
|                 | diopside                                              | clinoenstatit | hedenbergite | alumino-buffo | buffonite  | essenite    | jadeite     |           |           |    |        |       |   |   |        |      |    |   |        |       |  |  |
|                 | 41.95                                                 | 15.49         | 24.27        | 10.61         | -5.51      | 11.75       | 1.43        |           |           |    |        |       |   |   |        |      |    |   |        |       |  |  |
| feldspar        | mass                                                  | =             | 20.4         | (gm)          | density    | =           | 2.69        | (gm/cc)   | (analysis | in | mole   | %)    |   |   |        |      |    |   |        |       |  |  |
|                 | K0.00Na0.19Ca0.81Al1.81Si2.19O8                       |               |              |               |            |             |             |           |           |    |        |       |   |   |        |      |    |   |        |       |  |  |
|                 | G                                                     | =             | -344158.1    | (J)           | H          | =           | -286394.19  | (J)       | S         | =  | 45.89  | (J/K) | V | = | 7.59   | (cc) | Cp | = | 24.63  | (J/K) |  |  |
|                 | albite                                                | anorthite     | sanidine     |               |            |             |             |           |           |    |        |       |   |   |        |      |    |   |        |       |  |  |
|                 | 19.02                                                 | 80.59         | 0.39         |               |            |             |             |           |           |    |        |       |   |   |        |      |    |   |        |       |  |  |
| spinel          | mass                                                  | =             | 1.32         | (gm)          | density    | =           | 4.71        | (gm/cc)   | (analysis | in | mole   | %)    |   |   |        |      |    |   |        |       |  |  |
|                 | Fe"1.10Mg0.21Fe""1.13Al0.26Cr0.00Ti0.30O4             |               |              |               |            |             |             |           |           |    |        |       |   |   |        |      |    |   |        |       |  |  |
|                 | G                                                     | =             | -10798.34    | (J)           | H          | =           | -7441.17    | (J)       | S         | =  | 2.67   | (J/K) | V | = | 0.28   | (cc) | Cp | = | 1.22   | (J/K) |  |  |
|                 | chromite                                              | hercynite     | magnetite    | spinel        | ulvospinel |             |             |           |           |    |        |       |   |   |        |      |    |   |        |       |  |  |
|                 | 0                                                     | -7.91         | 56.73        | 20.82         | 30.36      |             |             |           |           |    |        |       |   |   |        |      |    |   |        |       |  |  |
| Viscosity       | of                                                    | the           | System:      | 4.61          | (log       | 10          | poise)      |           |           |    |        |       |   |   |        |      |    |   |        |       |  |  |
| System          | mass                                                  | =             | 99.4         | (gm)          | density    | =           | 2.32        | (gm/cc)   |           |    |        |       |   |   |        |      |    |   |        |       |  |  |
|                 | G                                                     | =             | -1609637     | (J)           | H          | =           | -1282571.31 | (J)       | S         | =  | 259.86 | (J/K) | V | = | 42.8   | (cc) | Cp | = | 134.33 | (J/K) |  |  |
| Oxygen          | delta                                                 | moles         | =            | 0.00163235    | delta      | grams       | =           | 0.0522332 |           |    |        |       |   |   |        |      |    |   |        |       |  |  |
|                 | G                                                     | =             | -465.12      | (J)           | H          | =           | 51.98       | (J)       | S         | =  | 0.41   | (J/K) | V | = | 170.82 | (cc) | Cp | = | 0.06   | (J/K) |  |  |
| *****-----***** |                                                       |               |              |               |            |             |             |           |           |    |        |       |   |   |        |      |    |   |        |       |  |  |
| Model 828 Bokan |                                                       |               |              |               |            |             |             |           |           |    |        |       |   |   |        |      |    |   |        |       |  |  |
| Temp (oC)       | =                                                     | 980.47        |              |               |            |             |             |           |           |    |        |       |   |   |        |      |    |   |        |       |  |  |
| Constraint      | Flags:                                                | fO2           | path         | =             | QFM        | Fractionate | Solids      |           |           |    |        |       |   |   |        |      |    |   |        |       |  |  |

|           |                                           |                                                       |              |               |            |          |             |         |           |     |        |       |      |        |           |      |     |        |       |       |
|-----------|-------------------------------------------|-------------------------------------------------------|--------------|---------------|------------|----------|-------------|---------|-----------|-----|--------|-------|------|--------|-----------|------|-----|--------|-------|-------|
| Liquid    | mass                                      | =                                                     | 63.62        | (gm)          | density    | =        | 2.32        | (gm/cc) | viscosity | =   | 3.72   | (log  | 10   | poise) | (analysis | in   | wt  | %)     |       |       |
|           | G                                         | =                                                     | -1032814.47  | (J)           | H          | =        | -813736.05  | (J)     | S         | =   | 174.76 | (J/K) | V    | =      | 27.45     | (cc) | Cp  | =      | 90.3  | (J/K) |
|           | SiO2                                      | TiO2                                                  | Al2O3        | Fe2O3         | Cr2O3      | FeO      | MnO         | MgO     | NiO       | CoO | CaO    | Na2O  | K2O  | P2O5   | H2O       | CO2  | SO3 | Cl2O-1 | F2O-1 |       |
|           | 58.28                                     | 0.47                                                  | 17.17        | 1.3           | 0          | 5.66     | 0.35        | 1.61    | 0         | 0   | 5.22   | 4.02  | 1.87 | 0.33   | 3.73      | 0    | 0   | 0      | 0     |       |
| opx       | mass                                      | =                                                     | 0.47         | (gm)          | density    | =        | 3.39        | (gm/cc) | (analysis | in  | mole   | %)    |      |        |           |      |     |        |       |       |
|           | opx                                       | Na0.00Ca0.07Fe"0.64Mg1.22Fe""0.02Ti0.00Al0.11Si1.93O6 |              |               |            |          |             |         |           |     |        |       |      |        |           |      |     |        |       |       |
|           | G                                         | =                                                     | -6775.82     | (J)           | H          | =        | -5496.17    | (J)     | S         | =   | 1.02   | (J/K) | V    | =      | 0.14      | (cc) | Cp  | =      | 0.55  | (J/K) |
|           | diopside                                  | clinoenstatit                                         | hedenbergite | alumino-buffo | buffonite  | essenite | jadeite     |         |           |     |        |       |      |        |           |      |     |        |       |       |
|           | -64.13                                    | 93.23                                                 | 64.22        | 4.16          | -3.84      | 6.23     | 0.13        |         |           |     |        |       |      |        |           |      |     |        |       |       |
| feldspar  | mass                                      | =                                                     | 1.57         | (gm)          | density    | =        | 2.67        | (gm/cc) | (analysis | in  | mole   | %)    |      |        |           |      |     |        |       |       |
|           | K0.01Na0.29Ca0.71Al1.71Si2.29O8           |                                                       |              |               |            |          |             |         |           |     |        |       |      |        |           |      |     |        |       |       |
|           | G                                         | =                                                     | -26492.74    | (J)           | H          | =        | -22033.96   | (J)     | S         | =   | 3.56   | (J/K) | V    | =      | 0.59      | (cc) | Cp  | =      | 1.9   | (J/K) |
|           | albite                                    | anorthite                                             | sanidine     |               |            |          |             |         |           |     |        |       |      |        |           |      |     |        |       |       |
|           | 28.74                                     | 70.62                                                 | 0.64         |               |            |          |             |         |           |     |        |       |      |        |           |      |     |        |       |       |
| spinel    | mass                                      | =                                                     | 0.29         | (gm)          | density    | =        | 4.74        | (gm/cc) | (analysis | in  | mole   | %)    |      |        |           |      |     |        |       |       |
|           | Fe"1.11Mg0.18Fe""1.19Al0.24Cr0.00Ti0.29O4 |                                                       |              |               |            |          |             |         |           |     |        |       |      |        |           |      |     |        |       |       |
|           | G                                         | =                                                     | -2308.39     | (J)           | H          | =        | -1581.67    | (J)     | S         | =   | 0.58   | (J/K) | V    | =      | 0.06      | (cc) | Cp  | =      | 0.27  | (J/K) |
|           | chromite                                  | hercynite                                             | magnetite    | spinel        | ulvospinel |          |             |         |           |     |        |       |      |        |           |      |     |        |       |       |
|           | 0                                         | -6.05                                                 | 59.6         | 17.86         | 28.59      |          |             |         |           |     |        |       |      |        |           |      |     |        |       |       |
| water     | mass                                      | =                                                     | 0.63         | (gm)          | density    | =        | 0.18        | (gm/cc) |           |     |        |       |      |        |           |      |     |        |       |       |
|           | H2O                                       |                                                       |              |               |            |          |             |         |           |     |        |       |      |        |           |      |     |        |       |       |
|           | G                                         | =                                                     | -15191.91    | (J)           | H          | =        | -7301.51    | (J)     | S         | =   | 6.29   | (J/K) | V    | =      | 3.49      | (cc) | Cp  | =      | 1.96  | (J/K) |
| Total     | solids                                    | mass                                                  | =            | 2.95          | (gm)       | density  | =           | 0.69    | (gm/cc)   |     |        |       |      |        |           |      |     |        |       |       |
|           | G                                         | =                                                     | -50768.86    | (J)           | H          | =        | -36413.31   | (J)     | S         | =   | 11.45  | (J/K) | V    | =      | 4.27      | (cc) | Cp  | =      | 4.68  | (J/K) |
| Summary   | of                                        | all                                                   | fractionated | phases:       | (total     | mass     | =           | 32.84   | grams)    |     |        |       |      |        |           |      |     |        |       |       |
| opx       | mass                                      | =                                                     | 1.67         | (gm)          | density    | =        | 3.38        | (gm/cc) | (analysis | in  | mole   | %)    |      |        |           |      |     |        |       |       |
|           | opx                                       | Na0.00Ca0.07Fe"0.61Mg1.25Fe""0.02Ti0.00Al0.11Si1.93O6 |              |               |            |          |             |         |           |     |        |       |      |        |           |      |     |        |       |       |
|           | G                                         | =                                                     | -24454.62    | (J)           | H          | =        | -19859.53   | (J)     | S         | =   | 3.67   | (J/K) | V    | =      | 0.49      | (cc) | Cp  | =      | 1.99  | (J/K) |
|           | diopside                                  | clinoenstatit                                         | hedenbergite | alumino-buffo | buffonite  | essenite | jadeite     |         |           |     |        |       |      |        |           |      |     |        |       |       |
|           | -61.19                                    | 93.06                                                 | 61.29        | 4.3           | -3.93      | 6.34     | 0.13        |         |           |     |        |       |      |        |           |      |     |        |       |       |
| cpx       | mass                                      | =                                                     | 7.44         | (gm)          | density    | =        | 3.3         | (gm/cc) | (analysis | in  | mole   | %)    |      |        |           |      |     |        |       |       |
|           | cpx                                       | Na0.01Ca0.83Fe"0.24Mg0.75Fe""0.06Ti0.03Al0.24Si1.83O6 |              |               |            |          |             |         |           |     |        |       |      |        |           |      |     |        |       |       |
|           | G                                         | =                                                     | -114707.23   | (J)           | H          | =        | -94623.81   | (J)     | S         | =   | 16.02  | (J/K) | V    | =      | 2.26      | (cc) | Cp  | =      | 8.55  | (J/K) |
|           | diopside                                  | clinoenstatit                                         | hedenbergite | alumino-buffo | buffonite  | essenite | jadeite     |         |           |     |        |       |      |        |           |      |     |        |       |       |
|           | 41.95                                     | 15.49                                                 | 24.27        | 10.61         | -5.51      | 11.75    | 1.43        |         |           |     |        |       |      |        |           |      |     |        |       |       |
| feldspar  | mass                                      | =                                                     | 22.09        | (gm)          | density    | =        | 2.69        | (gm/cc) | (analysis | in  | mole   | %)    |      |        |           |      |     |        |       |       |
|           | K0.00Na0.20Ca0.80Al1.80Si2.20O8           |                                                       |              |               |            |          |             |         |           |     |        |       |      |        |           |      |     |        |       |       |
|           | G                                         | =                                                     | -372401.85   | (J)           | H          | =        | -310202.97  | (J)     | S         | =   | 49.62  | (J/K) | V    | =      | 8.22      | (cc) | Cp  | =      | 26.66 | (J/K) |
|           | albite                                    | anorthite                                             | sanidine     |               |            |          |             |         |           |     |        |       |      |        |           |      |     |        |       |       |
|           | 19.65                                     | 79.94                                                 | 0.4          |               |            |          |             |         |           |     |        |       |      |        |           |      |     |        |       |       |
| spinel    | mass                                      | =                                                     | 1.64         | (gm)          | density    | =        | 4.71        | (gm/cc) | (analysis | in  | mole   | %)    |      |        |           |      |     |        |       |       |
|           | Fe"1.10Mg0.20Fe""1.14Al0.26Cr0.00Ti0.30O4 |                                                       |              |               |            |          |             |         |           |     |        |       |      |        |           |      |     |        |       |       |
|           | G                                         | =                                                     | -13329.81    | (J)           | H          | =        | -9194.87    | (J)     | S         | =   | 3.3    | (J/K) | V    | =      | 0.35      | (cc) | Cp  | =      | 1.52  | (J/K) |
|           | chromite                                  | hercynite                                             | magnetite    | spinel        | ulvospinel |          |             |         |           |     |        |       |      |        |           |      |     |        |       |       |
|           | 0                                         | -7.66                                                 | 57.12        | 20.41         | 30.12      |          |             |         |           |     |        |       |      |        |           |      |     |        |       |       |
| Viscosity | of                                        | the                                                   | System:      | 4.84          | (log       | 10       | poise)      |         |           |     |        |       |      |        |           |      |     |        |       |       |
| System    | mass                                      | =                                                     | 99.41        | (gm)          | density    | =        | 2.31        | (gm/cc) |           |     |        |       |      |        |           |      |     |        |       |       |
|           | G                                         | =                                                     | -1608476.84  | (J)           | H          | =        | -1284030.53 | (J)     | S         | =   | 258.81 | (J/K) | V    | =      | 43.04     | (cc) | Cp  | =      | 133.7 | (J/K) |

|                 |                                           |                                                       |              |                        |            |             |            |                       |           |     |        |       |      |        |           |      |     |        |       |       |
|-----------------|-------------------------------------------|-------------------------------------------------------|--------------|------------------------|------------|-------------|------------|-----------------------|-----------|-----|--------|-------|------|--------|-----------|------|-----|--------|-------|-------|
| Oxygen          | delta<br>G                                | moles<br>=                                            | =<br>-533.01 | =<br>0.00187889<br>(J) | delta<br>H | grams<br>=  | =<br>59.49 | =<br>0.0601223<br>(J) | S         | =   | 0.47   | (J/K) | V    | =      | 195.84    | (cc) | Cp  | =      | 0.07  | (J/K) |
| *****-----***** |                                           |                                                       |              |                        |            |             |            |                       |           |     |        |       |      |        |           |      |     |        |       |       |
| Model 828 Bokan |                                           |                                                       |              |                        |            |             |            |                       |           |     |        |       |      |        |           |      |     |        |       |       |
| Temp (oC)       | =                                         | 975.47                                                |              |                        |            |             |            |                       |           |     |        |       |      |        |           |      |     |        |       |       |
| Constraint      | Flags:                                    | fO2                                                   | path         | =                      | QFM        | Fractionate | Solids     |                       |           |     |        |       |      |        |           |      |     |        |       |       |
| Liquid          | mass                                      | =                                                     | 61.42        | (gm)                   | density    | =           | 2.31       | (gm/cc)               | viscosity | =   | 3.8    | (log  | 10   | poise) | (analysis | in   | wt  | %)     | 87.01 | (J/K) |
|                 | G                                         | =                                                     | -997585.25   | (J)                    | H          | =           | -787240.74 | (J)                   | S         | =   | 168.46 | (J/K) | V    | =      | 26.56     | (cc) | Cp  | =      |       |       |
|                 | SiO2                                      | TiO2                                                  | Al2O3        | Fe2O3                  | Cr2O3      | FeO         | MnO        | MgO                   | NiO       | CoO | CaO    | Na2O  | K2O  | P2O5   | H2O       | CO2  | SO3 | Cl2O-1 |       |       |
|                 | 58.81                                     | 0.44                                                  | 16.99        | 1.27                   | 0          | 5.46        | 0.36       | 1.51                  | 0         | 0   | 5.05   | 4.08  | 1.94 | 0.34   | 3.75      | 0    | 0   | 0      |       |       |
| opx             | mass                                      | =                                                     | 0.42         | (gm)                   | density    | =           | 3.39       | (gm/cc)               | (analysis | in  | mole   | %)    |      |        |           |      |     |        |       |       |
|                 | opx                                       | Na0.00Ca0.07Fe"0.66Mg1.21Fe""0.02Ti0.00Al0.10Si1.94O6 |              |                        |            |             |            |                       |           |     |        |       |      |        |           |      |     |        |       |       |
|                 | G                                         | =                                                     | -6042.81     | (J)                    | H          | =           | -4904.93   | (J)                   | S         | =   | 0.91   | (J/K) | V    | =      | 0.12      | (cc) | Cp  | =      | 0.49  | (J/K) |
|                 | diopside                                  | clinoenstatit                                         | hedenbergite | alumino-buffo          | buffonite  | essenite    | jadeite    |                       |           |     |        |       |      |        |           |      |     |        |       |       |
|                 | -65.62                                    | 93.34                                                 | 65.67        | 4.09                   | -3.8       | 6.18        | 0.13       |                       |           |     |        |       |      |        |           |      |     |        |       |       |
| feldspar        | mass                                      | =                                                     | 1.47         | (gm)                   | density    | =           | 2.67       | (gm/cc)               | (analysis | in  | mole   | %)    |      |        |           |      |     |        |       |       |
|                 | K0.01Na0.30Ca0.69Al1.69Si2.31O8           |                                                       |              |                        |            |             |            |                       |           |     |        |       |      |        |           |      |     |        |       |       |
|                 | G                                         | =                                                     | -24722.48    | (J)                    | H          | =           | -20579.17  | (J)                   | S         | =   | 3.32   | (J/K) | V    | =      | 0.55      | (cc) | Cp  | =      | 1.78  | (J/K) |
|                 | albite                                    | anorthite                                             | sanidine     |                        |            |             |            |                       |           |     |        |       |      |        |           |      |     |        |       |       |
|                 | 30.26                                     | 69.06                                                 | 0.68         |                        |            |             |            |                       |           |     |        |       |      |        |           |      |     |        |       |       |
| spinel          | mass                                      | =                                                     | 0.26         | (gm)                   | density    | =           | 4.75       | (gm/cc)               | (analysis | in  | mole   | %)    |      |        |           |      |     |        |       |       |
|                 | Fe"1.11Mg0.17Fe""1.21Al0.23Cr0.00Ti0.28O4 |                                                       |              |                        |            |             |            |                       |           |     |        |       |      |        |           |      |     |        |       |       |
|                 | G                                         | =                                                     | -2086.7      | (J)                    | H          | =           | -1429.68   | (J)                   | S         | =   | 0.53   | (J/K) | V    | =      | 0.06      | (cc) | Cp  | =      | 0.24  | (J/K) |
|                 | chromite                                  | hercynite                                             | magnetite    | spinel                 | ulvospinel |             |            |                       |           |     |        |       |      |        |           |      |     |        |       |       |
|                 | 0                                         | -5.55                                                 | 60.43        | 17.06                  | 28.05      |             |            |                       |           |     |        |       |      |        |           |      |     |        |       |       |
| water           | mass                                      | =                                                     | 0.7          | (gm)                   | density    | =           | 0.18       | (gm/cc)               |           |     |        |       |      |        |           |      |     |        |       |       |
|                 | H2O                                       |                                                       |              |                        |            |             |            |                       |           |     |        |       |      |        |           |      |     |        |       |       |
|                 | G                                         | =                                                     | -16886.17    | (J)                    | H          | =           | -8143.58   | (J)                   | S         | =   | 7      | (J/K) | V    | =      | 3.86      | (cc) | Cp  | =      | 2.19  | (J/K) |
| Total           | solids                                    | mass                                                  | =            | 2.84                   | (gm)       | density     | =          | 0.62                  | (gm/cc)   |     |        |       |      |        |           |      |     |        |       |       |
|                 | G                                         | =                                                     | -49738.16    | (J)                    | H          | =           | -35057.36  | (J)                   | S         | =   | 11.76  | (J/K) | V    | =      | 4.59      | (cc) | Cp  | =      | 4.7   | (J/K) |
| Summary         | of                                        | all                                                   | fractionated | phases:                | (total     | mass        | =          | 35.15                 | grams)    |     |        |       |      |        |           |      |     |        |       |       |
| opx             | mass                                      | =                                                     | 2.13         | (gm)                   | density    | =           | 3.38       | (gm/cc)               | (analysis | in  | mole   | %)    |      |        |           |      |     |        |       |       |
|                 | opx                                       | Na0.00Ca0.07Fe"0.62Mg1.25Fe""0.02Ti0.00Al0.11Si1.93O6 |              |                        |            |             |            |                       |           |     |        |       |      |        |           |      |     |        |       |       |
|                 | G                                         | =                                                     | -31174.6     | (J)                    | H          | =           | -25342.07  | (J)                   | S         | =   | 4.67   | (J/K) | V    | =      | 0.63      | (cc) | Cp  | =      | 2.54  | (J/K) |
|                 | diopside                                  | clinoenstatit                                         | hedenbergite | alumino-buffo          | buffonite  | essenite    | jadeite    |                       |           |     |        |       |      |        |           |      |     |        |       |       |
|                 | -61.83                                    | 93.1                                                  | 61.93        | 4.27                   | -3.91      | 6.31        | 0.13       |                       |           |     |        |       |      |        |           |      |     |        |       |       |
| cpx             | mass                                      | =                                                     | 7.44         | (gm)                   | density    | =           | 3.3        | (gm/cc)               | (analysis | in  | mole   | %)    |      |        |           |      |     |        |       |       |
|                 | cpx                                       | Na0.01Ca0.83Fe"0.24Mg0.75Fe""0.06Ti0.03Al0.24Si1.83O6 |              |                        |            |             |            |                       |           |     |        |       |      |        |           |      |     |        |       |       |
|                 | G                                         | =                                                     | -114627.21   | (J)                    | H          | =           | -94666.57  | (J)                   | S         | =   | 15.99  | (J/K) | V    | =      | 2.25      | (cc) | Cp  | =      | 8.55  | (J/K) |
|                 | diopside                                  | clinoenstatit                                         | hedenbergite | alumino-buffo          | buffonite  | essenite    | jadeite    |                       |           |     |        |       |      |        |           |      |     |        |       |       |
|                 | 41.95                                     | 15.49                                                 | 24.27        | 10.61                  | -5.51      | 11.75       | 1.43       |                       |           |     |        |       |      |        |           |      |     |        |       |       |
| feldspar        | mass                                      | =                                                     | 23.66        | (gm)                   | density    | =           | 2.69       | (gm/cc)               | (analysis | in  | mole   | %)    |      |        |           |      |     |        |       |       |
|                 | K0.00Na0.20Ca0.79Al1.79Si2.21O8           |                                                       |              |                        |            |             |            |                       |           |     |        |       |      |        |           |      |     |        |       |       |
|                 | G                                         | =                                                     | -398583.78   | (J)                    | H          | =           | -332340.81 | (J)                   | S         | =   | 53.05  | (J/K) | V    | =      | 8.81      | (cc) | Cp  | =      | 28.54 | (J/K) |
|                 | albite                                    | anorthite                                             | sanidine     |                        |            |             |            |                       |           |     |        |       |      |        |           |      |     |        |       |       |
|                 | 20.26                                     | 79.32                                                 | 0.42         |                        |            |             |            |                       |           |     |        |       |      |        |           |      |     |        |       |       |
| spinel          | mass                                      | =                                                     | 1.93         | (gm)                   | density    | =           | 4.72       | (gm/cc)               | (analysis | in  | mole   | %)    |      |        |           |      |     |        |       |       |
|                 | Fe"1.10Mg0.20Fe""1.15Al0.25Cr0.00Ti0.30O4 |                                                       |              |                        |            |             |            |                       |           |     |        |       |      |        |           |      |     |        |       |       |

|                 |                                                                        |                         |                                                                                 |                                   |                                    |              |                                   |                               |                            |         |                              |                               |                     |                             |                                   |                        |                      |                        |                     |       |       |
|-----------------|------------------------------------------------------------------------|-------------------------|---------------------------------------------------------------------------------|-----------------------------------|------------------------------------|--------------|-----------------------------------|-------------------------------|----------------------------|---------|------------------------------|-------------------------------|---------------------|-----------------------------|-----------------------------------|------------------------|----------------------|------------------------|---------------------|-------|-------|
|                 | G<br>chromite<br>0                                                     | =<br>hercynite<br>-7.42 | -15601.59<br>magnetite<br>57.49                                                 | (J)<br>spinel<br>20.04            | H<br>ulvospinel<br>29.89           | =            | -10773.57                         | (J)                           | S                          | =       | 3.87                         | (J/K)                         | V                   | =                           | 0.41                              | (cc)                   | Cp                   | =                      | 1.78                | (J/K) |       |
| Viscosity       | of                                                                     | the                     | System:                                                                         | 5.08                              | (log                               | 10           | poise)                            |                               |                            |         |                              |                               |                     |                             |                                   |                        |                      |                        |                     |       |       |
| System          | mass<br>G                                                              | =<br>=                  | 99.42<br>-1607310.58                                                            | (gm)<br>(J)                       | density<br>H                       | =<br>=       | 2.3<br>-1285421.12                | (gm/cc)<br>(J)                | S                          | =       | 257.8                        | (J/K)                         | V                   | =                           | 43.25                             | (cc)                   | Cp                   | =                      | 133.12              | (J/K) |       |
| Oxygen          | delta<br>G                                                             | moles<br>=              | =<br>-594.51                                                                    | 0.00210503<br>(J)                 | delta<br>H                         | grams<br>=   | =<br>66.28                        | 0.0673583<br>(J)              | S                          | =       | 0.53                         | (J/K)                         | V                   | =                           | 218.53                            | (cc)                   | Cp                   | =                      | 0.08                | (J/K) |       |
| *****-----***** |                                                                        |                         |                                                                                 |                                   |                                    |              |                                   |                               |                            |         |                              |                               |                     |                             |                                   |                        |                      |                        |                     |       |       |
| Model 828 Bokan |                                                                        |                         |                                                                                 |                                   |                                    |              |                                   |                               |                            |         |                              |                               |                     |                             |                                   |                        |                      |                        |                     |       |       |
| Temp (oC)       | =                                                                      | 970.47                  |                                                                                 |                                   |                                    |              |                                   |                               |                            |         |                              |                               |                     |                             |                                   |                        |                      |                        |                     |       |       |
| Constraint      | Flags:                                                                 | fO2                     | path                                                                            | =                                 | QFM                                | Fractionate  | Solids                            |                               |                            |         |                              |                               |                     |                             |                                   |                        |                      |                        |                     |       |       |
| Liquid          | mass<br>G<br>SiO2<br>59.33                                             | =<br>=                  | 59.37<br>-964852.27<br>TiO2<br>0.41                                             | (gm)<br>(J)<br>Fe2O3<br>1.24      | density<br>H<br>Cr2O3<br>0         | =<br>=       | 2.31<br>-762630.51<br>FeO<br>5.27 | (gm/cc)<br>(J)<br>MgO<br>1.41 | viscosity<br>S<br>NiO<br>0 | =<br>=  | 3.88<br>162.61<br>CaO<br>4.9 | (log<br>(J/K)<br>Na2O<br>4.13 | 10<br>V<br>K2O<br>2 | poise)<br>=<br>P2O5<br>0.35 | (analysis<br>25.74<br>H2O<br>3.77 | in<br>(cc)<br>CO2<br>0 | wt<br>Cp<br>SO3<br>0 | (%<br>=<br>Cl2O-1<br>0 | 83.96<br>F2O-1<br>0 | (J/K) |       |
| opx             | mass<br>opx<br>G<br>diopside<br>-67.12                                 | =<br>=                  | 0.37<br>Na0.00Ca0.06Fe"0.67Mg1.20Fe"0.02Ti0.00Al0.10Si1.94O6<br>-5411.9<br>=    | (gm)<br>(J)<br>H<br>4.04          | density<br>H<br>buffonite<br>-3.76 | =<br>=       | 3.4<br>-4395.82<br>=              | (gm/cc)<br>(J)                | (analysis<br>S             | in<br>= | mole<br>0.82                 | (%)<br>(J/K)                  | V                   | =                           | 0.11                              | (cc)                   | Cp                   | =                      | 0.44                | (J/K) |       |
| feldspar        | mass<br>K0.01Na0.32Ca0.67Al1.67Si2.33O8<br>G<br>albite<br>31.81        | =<br>=                  | 1.38<br>-23179.44<br>sanidine<br>0.73                                           | (gm)<br>(J)                       | density<br>H                       | =<br>=       | 2.66<br>-19311.15                 | (gm/cc)<br>(J)                | (analysis<br>S             | in<br>= | mole<br>3.11                 | (%)<br>(J/K)                  | V                   | =                           | 0.52                              | (cc)                   | Cp                   | =                      | 1.67                | (J/K) |       |
| spinel          | mass<br>Fe"1.11Mg0.16Fe"1.22Al0.22Cr0.00Ti0.28O4<br>G<br>chromite<br>0 | =<br>=                  | 0.24<br>-1894.02<br>hercynite<br>-5.07                                          | (gm)<br>(J)<br>magnetite<br>61.24 | density<br>H<br>spinel<br>16.32    | =<br>=       | 4.76<br>-1297.74                  | (gm/cc)<br>(J)                | (analysis<br>S             | in<br>= | mole<br>0.48                 | (%)<br>(J/K)                  | V                   | =                           | 0.05                              | (cc)                   | Cp                   | =                      | 0.22                | (J/K) |       |
| water           | mass<br>H2O<br>G                                                       | =<br>=                  | 0.76<br>-18468.4                                                                | (gm)<br>(J)                       | density<br>H                       | =<br>=       | 0.18<br>-8937.14                  | (gm/cc)<br>(J)                |                            | S       | =                            | 7.66                          | (J/K)               | V                           | =                                 | 4.21                   | (cc)                 | Cp                     | =                   | 2.41  | (J/K) |
| Total           | solids<br>G                                                            | mass<br>=               | =<br>-48953.76                                                                  | 2.76<br>(J)                       | (gm)<br>H                          | density<br>= | =<br>-33941.84                    | 0.56<br>(J)                   | (gm/cc)<br>S               | =       | 12.07                        | (J/K)                         | V                   | =                           | 4.88                              | (cc)                   | Cp                   | =                      | 4.74                | (J/K) |       |
| Summary         | of                                                                     | all                     | fractionated                                                                    | phases:                           | (total                             | mass         | =                                 | 37.3                          | grams)                     |         |                              |                               |                     |                             |                                   |                        |                      |                        |                     |       |       |
| opx             | mass<br>opx<br>G<br>diopside<br>-62.44                                 | =<br>=                  | 2.54<br>Na0.00Ca0.07Fe"0.63Mg1.24Fe"0.02Ti0.00Al0.11Si1.93O6<br>-37157.17<br>=  | (gm)<br>(J)<br>H<br>4.24          | density<br>H<br>buffonite<br>-3.89 | =<br>=       | 3.38<br>-30235.85<br>=            | (gm/cc)<br>(J)                | (analysis<br>S             | in<br>= | mole<br>5.57                 | (%)<br>(J/K)                  | V                   | =                           | 0.75                              | (cc)                   | Cp                   | =                      | 3.03                | (J/K) |       |
| cpx             | mass<br>cpx<br>G<br>diopside<br>41.95                                  | =<br>=                  | 7.44<br>Na0.01Ca0.83Fe"0.24Mg0.75Fe"0.06Ti0.03Al0.24Si1.83O6<br>-114547.37<br>= | (gm)<br>(J)<br>H<br>10.61         | density<br>H<br>buffonite<br>-5.51 | =<br>=       | 3.3<br>-94709.3<br>=              | (gm/cc)<br>(J)                | (analysis<br>S             | in<br>= | mole<br>15.95                | (%)<br>(J/K)                  | V                   | =                           | 2.25                              | (cc)                   | Cp                   | =                      | 8.54                | (J/K) |       |

|                 |                                          |                                                      |              |              |           |             |             |           |            |     |        |       |      |        |           |      |     |        |        |       |  |
|-----------------|------------------------------------------|------------------------------------------------------|--------------|--------------|-----------|-------------|-------------|-----------|------------|-----|--------|-------|------|--------|-----------|------|-----|--------|--------|-------|--|
| feldspar        | mass                                     | =                                                    | 25.12        | (gm)         | density   | =           | 2.69        | (gm/cc)   | (analysis  | in  | mole   | %)    |      |        |           |      |     |        |        |       |  |
|                 | K0.00Na0.21Ca0.79Al1.79Si2.21O8          |                                                      |              |              |           |             |             |           |            |     |        |       |      |        |           |      |     |        |        |       |  |
|                 | G                                        | =                                                    | -422979.64   | (J)          | H         | =           | -353032.62  | (J)       | S          | =   | 56.24  | (J/K) | V    | =      | 9.36      | (cc) | Cp  | =      | 30.29  | (J/K) |  |
|                 | albite                                   |                                                      | anorthite    |              | sanidine  |             |             |           |            |     |        |       |      |        |           |      |     |        |        |       |  |
|                 | 20.85                                    |                                                      | 78.72        |              | 0.44      |             |             |           |            |     |        |       |      |        |           |      |     |        |        |       |  |
| spinel          | mass                                     | =                                                    | 2.19         | (gm)         | density   | =           | 4.72        | (gm/cc)   | (analysis  | in  | mole   | %)    |      |        |           |      |     |        |        |       |  |
|                 | Fe"1.10Mg0.20Fe"1.16Al0.25Cr0.00Ti0.30O4 |                                                      |              |              |           |             |             |           |            |     |        |       |      |        |           |      |     |        |        |       |  |
|                 | G                                        | =                                                    | -17649.2     | (J)          | H         | =           | -12201.53   | (J)       | S          | =   | 4.38   | (J/K) | V    | =      | 0.46      | (cc) | Cp  | =      | 2.02   | (J/K) |  |
|                 | chromite                                 |                                                      | hercynite    |              | magnetite |             | spinel      |           | ulvospinel |     |        |       |      |        |           |      |     |        |        |       |  |
|                 | 0                                        |                                                      | -7.2         |              | 57.84     |             | 19.68       |           | 29.68      |     |        |       |      |        |           |      |     |        |        |       |  |
| Viscosity       | of                                       | the                                                  | System:      | 5.34         | (log      | 10          | poise)      |           |            |     |        |       |      |        |           |      |     |        |        |       |  |
| System          | mass                                     | =                                                    | 99.42        | (gm)         | density   | =           | 2.29        | (gm/cc)   |            |     |        |       |      |        |           |      |     |        |        |       |  |
|                 | G                                        | =                                                    | -1606139.4   | (J)          | H         | =           | -1286751.65 | (J)       | S          | =   | 256.82 | (J/K) | V    | =      | 43.45     | (cc) | Cp  | =      | 132.58 | (J/K) |  |
| Oxygen          | delta                                    | moles                                                | =            | 0.00231317   | delta     | grams       | =           | 0.0740187 |            |     |        |       |      |        |           |      |     |        |        |       |  |
|                 | G                                        | =                                                    | -650.39      | (J)          | H         | =           | 72.42       | (J)       | S          | =   | 0.58   | (J/K) | V    | =      | 239.18    | (cc) | Cp  | =      | 0.08   | (J/K) |  |
| *****-----***** |                                          |                                                      |              |              |           |             |             |           |            |     |        |       |      |        |           |      |     |        |        |       |  |
| Model 828 Bokan |                                          |                                                      |              |              |           |             |             |           |            |     |        |       |      |        |           |      |     |        |        |       |  |
| Temp (oC)       | =                                        | 965.47                                               |              |              |           |             |             |           |            |     |        |       |      |        |           |      |     |        |        |       |  |
| Constraint      | Flags:                                   | fO2                                                  | path         | =            | QFM       | Fractionate | Solids      |           |            |     |        |       |      |        |           |      |     |        |        |       |  |
| Liquid          | mass                                     | =                                                    | 57.46        | (gm)         | density   | =           | 2.3         | (gm/cc)   | viscosity  | =   | 3.95   | (log  | 10   | poise) | (analysis | in   | wt  | %)     |        |       |  |
|                 | G                                        | =                                                    | -934303.41   | (J)          | H         | =           | -739667.26  | (J)       | S          | =   | 157.14 | (J/K) | V    | =      | 24.97     | (cc) | Cp  | =      | 81.12  | (J/K) |  |
|                 | SiO2                                     | TiO2                                                 | Al2O3        | Fe2O3        | Cr2O3     | FeO         | MnO         | MgO       | NiO        | CoO | CaO    | Na2O  | K2O  | P2O5   | H2O       | CO2  | SO3 | Cl2O-1 | F2O-1  |       |  |
|                 | 59.83                                    | 0.39                                                 | 16.65        | 1.21         | 0         | 5.08        | 0.38        | 1.32      | 0          | 0   | 4.75   | 4.19  | 2.07 | 0.37   | 3.78      | 0    | 0   | 0      | 0      |       |  |
| opx             | mass                                     | =                                                    | 0.34         | (gm)         | density   | =           | 3.41        | (gm/cc)   | (analysis  | in  | mole   | %)    |      |        |           |      |     |        |        |       |  |
|                 | opx                                      | Na0.00Ca0.06Fe"0.69Mg1.19Fe"0.02Ti0.00Al0.10Si1.94O6 |              |              |           |             |             |           |            |     |        |       |      |        |           |      |     |        |        |       |  |
|                 | G                                        | =                                                    | -4865.54     | (J)          | H         | =           | -3954.75    | (J)       | S          | =   | 0.74   | (J/K) | V    | =      | 0.1       | (cc) | Cp  | =      | 0.4    | (J/K) |  |
|                 | diopside                                 | clinoenstatit                                        | hedenbergite | alumno-buffo | buffonite | essenite    | jadeite     |           |            |     |        |       |      |        |           |      |     |        |        |       |  |
|                 | -68.64                                   | 93.58                                                | 68.57        | 3.99         | -3.73     | 6.1         | 0.14        |           |            |     |        |       |      |        |           |      |     |        |        |       |  |
| feldspar        | mass                                     | =                                                    | 1.3          | (gm)         | density   | =           | 2.66        | (gm/cc)   | (analysis  | in  | mole   | %)    |      |        |           |      |     |        |        |       |  |
|                 | K0.01Na0.33Ca0.66Al1.66Si2.34O8          |                                                      |              |              |           |             |             |           |            |     |        |       |      |        |           |      |     |        |        |       |  |
|                 | G                                        | =                                                    | -21825.48    | (J)          | H         | =           | -18198.59   | (J)       | S          | =   | 2.93   | (J/K) | V    | =      | 0.49      | (cc) | Cp  | =      | 1.57   | (J/K) |  |
|                 | albite                                   |                                                      | anorthite    |              | sanidine  |             |             |           |            |     |        |       |      |        |           |      |     |        |        |       |  |
|                 | 33.38                                    |                                                      | 65.83        |              | 0.78      |             |             |           |            |     |        |       |      |        |           |      |     |        |        |       |  |
| spinel          | mass                                     | =                                                    | 0.22         | (gm)         | density   | =           | 4.77        | (gm/cc)   | (analysis  | in  | mole   | %)    |      |        |           |      |     |        |        |       |  |
|                 | Fe"1.11Mg0.16Fe"1.24Al0.22Cr0.00Ti0.27O4 |                                                      |              |              |           |             |             |           |            |     |        |       |      |        |           |      |     |        |        |       |  |
|                 | G                                        | =                                                    | -1725.41     | (J)          | H         | =           | -1182.37    | (J)       | S          | =   | 0.44   | (J/K) | V    | =      | 0.05      | (cc) | Cp  | =      | 0.2    | (J/K) |  |
|                 | chromite                                 |                                                      | hercynite    |              | magnetite |             | spinel      |           | ulvospinel |     |        |       |      |        |           |      |     |        |        |       |  |
|                 | 0                                        |                                                      | -4.63        |              | 62.05     |             | 15.62       |           | 26.97      |     |        |       |      |        |           |      |     |        |        |       |  |
| water           | mass                                     | =                                                    | 0.83         | (gm)         | density   | =           | 0.18        | (gm/cc)   |            |     |        |       |      |        |           |      |     |        |        |       |  |
|                 | H2O                                      |                                                      |              |              |           |             |             |           |            |     |        |       |      |        |           |      |     |        |        |       |  |
|                 | G                                        | =                                                    | -19952.2     | (J)          | H         | =           | -9688.27    | (J)       | S          | =   | 8.29   | (J/K) | V    | =      | 4.53      | (cc) | Cp  | =      | 2.61   | (J/K) |  |
| Total           | solids                                   | mass                                                 | =            | 2.68         | (gm)      | density     | =           | 0.52      | (gm/cc)    |     |        |       |      |        |           |      |     |        |        |       |  |
|                 | G                                        | =                                                    | -48368.63    | (J)          | H         | =           | -33023.98   | (J)       | S          | =   | 12.39  | (J/K) | V    | =      | 5.16      | (cc) | Cp  | =      | 4.78   | (J/K) |  |
| Summary         | of                                       | all                                                  | fractionated | phases:      | (total    | mass        | =           | 39.28     | grams)     |     |        |       |      |        |           |      |     |        |        |       |  |
| opx             | mass                                     | =                                                    | 2.92         | (gm)         | density   | =           | 3.38        | (gm/cc)   | (analysis  | in  | mole   | %)    |      |        |           |      |     |        |        |       |  |
|                 | opx                                      | Na0.00Ca0.07Fe"0.63Mg1.23Fe"0.02Ti0.00Al0.11Si1.93O6 |              |              |           |             |             |           |            |     |        |       |      |        |           |      |     |        |        |       |  |

|                 |                                           |        |                                                       |              |              |             |             |            |           |    |        |       |      |        |           |      |     |        |        |       |
|-----------------|-------------------------------------------|--------|-------------------------------------------------------|--------------|--------------|-------------|-------------|------------|-----------|----|--------|-------|------|--------|-----------|------|-----|--------|--------|-------|
|                 | G                                         | =      | -42504.91                                             | (J)          | H            | =           | -34622.76   | (J)        | S         | =  | 6.36   | (J/K) | V    | =      | 0.86      | (cc) | Cp  | =      | 3.47   | (J/K) |
|                 | diopside                                  |        | clinoenstatit                                         | hedenbergite | alumno-buffo |             | essnite     | jadeite    |           |    |        |       |      |        |           |      |     |        |        |       |
|                 | -63.04                                    |        | 93.18                                                 | 63.11        | 4.21         |             | 6.27        | 0.13       |           |    |        |       |      |        |           |      |     |        |        |       |
| cpx             | mass                                      | =      | 7.44                                                  | (gm)         | density      | =           | 3.3         | (gm/cc)    | (analysis | in | mole   | %)    |      |        |           |      |     |        |        |       |
|                 | cpx                                       |        | Na0.01Ca0.83Fe"0.24Mg0.75Fe""0.06Ti0.03Al0.24Si1.83O6 |              |              |             |             |            |           |    |        |       |      |        |           |      |     |        |        |       |
|                 | G                                         | =      | -114467.69                                            | (J)          | H            | =           | -94752.01   | (J)        | S         | =  | 15.92  | (J/K) | V    | =      | 2.25      | (cc) | Cp  | =      | 8.54   | (J/K) |
|                 | diopside                                  |        | clinoenstatit                                         | hedenbergite | alumno-buffo |             | essnite     | jadeite    |           |    |        |       |      |        |           |      |     |        |        |       |
|                 | 41.95                                     |        | 15.49                                                 | 24.27        | 10.61        |             | 11.75       | 1.43       |           |    |        |       |      |        |           |      |     |        |        |       |
| feldspar        | mass                                      | =      | 26.5                                                  | (gm)         | density      | =           | 2.68        | (gm/cc)    | (analysis | in | mole   | %)    |      |        |           |      |     |        |        |       |
|                 | K0.00Na0.21Ca0.78Al1.78Si2.22O8           |        |                                                       |              |              |             |             |            |           |    |        |       |      |        |           |      |     |        |        |       |
|                 | G                                         | =      | -445817.73                                            | (J)          | H            | =           | -372464.58  | (J)        | S         | =  | 59.22  | (J/K) | V    | =      | 9.87      | (cc) | Cp  | =      | 31.94  | (J/K) |
|                 | albite                                    |        | anorthite                                             | sanidine     |              |             |             |            |           |    |        |       |      |        |           |      |     |        |        |       |
|                 | 21.42                                     |        | 78.13                                                 | 0.45         |              |             |             |            |           |    |        |       |      |        |           |      |     |        |        |       |
| spinel          | mass                                      | =      | 2.43                                                  | (gm)         | density      | =           | 4.73        | (gm/cc)    | (analysis | in | mole   | %)    |      |        |           |      |     |        |        |       |
|                 | Fe"1.10Mg0.19Fe""1.16Al0.25Cr0.00Ti0.29O4 |        |                                                       |              |              |             |             |            |           |    |        |       |      |        |           |      |     |        |        |       |
|                 | G                                         | =      | -19501.9                                              | (J)          | H            | =           | -13498.7    | (J)        | S         | =  | 4.85   | (J/K) | V    | =      | 0.51      | (cc) | Cp  | =      | 2.24   | (J/K) |
|                 | chromite                                  |        | hercynite                                             | magnetite    | spinel       |             |             | ulvospinel |           |    |        |       |      |        |           |      |     |        |        |       |
|                 | 0                                         |        | -6.99                                                 | 58.17        | 19.36        |             |             | 29.46      |           |    |        |       |      |        |           |      |     |        |        |       |
| Viscosity       | of                                        | the    | System:                                               | 5.63         | (log         | 10          | poise)      |            |           |    |        |       |      |        |           |      |     |        |        |       |
| System          | mass                                      | =      | 99.43                                                 | (gm)         | density      | =           | 2.28        | (gm/cc)    |           |    |        |       |      |        |           |      |     |        |        |       |
|                 | G                                         | =      | -1604964.27                                           | (J)          | H            | =           | -1288029.29 | (J)        | S         | =  | 255.88 | (J/K) | V    | =      | 43.63     | (cc) | Cp  | =      | 132.08 | (J/K) |
| Oxygen          | delta                                     | moles  | =                                                     | 0.00250535   | delta        | grams       | =           | 0.0801681  |           |    |        |       |      |        |           |      |     |        |        |       |
|                 | G                                         | =      | -701.27                                               | (J)          | H            | =           | 77.99       | (J)        | S         | =  | 0.63   | (J/K) | V    | =      | 258.01    | (cc) | Cp  | =      | 0.09   | (J/K) |
| *****-----***** |                                           |        |                                                       |              |              |             |             |            |           |    |        |       |      |        |           |      |     |        |        |       |
| Model 828 Bokan |                                           |        |                                                       |              |              |             |             |            |           |    |        |       |      |        |           |      |     |        |        |       |
| Temp (oC)       | =                                         | 960.47 |                                                       |              |              |             |             |            |           |    |        |       |      |        |           |      |     |        |        |       |
| Constraint      | Flags:                                    | fO2    | path                                                  | =            | QFM          | Fractionate | Solids      |            |           |    |        |       |      |        |           |      |     |        |        |       |
| Liquid          | mass                                      | =      | 55.68                                                 | (gm)         | density      | =           | 2.3         | (gm/cc)    | viscosity | =  | 4.03   | (log  | 10   | poise) | (analysis | in   | wt  | %)     |        |       |
|                 | G                                         | =      | -905677.79                                            | (J)          | H            | =           | -718152.11  | (J)        | S         | =  | 152.01 | (J/K) | V    | =      | 24.25     | (cc) | Cp  | =      | 78.46  | (J/K) |
|                 | SiO2                                      |        | TiO2                                                  | Al2O3        | Fe2O3        |             | FeO         | MnO        | CaO       |    | 4.6    | 4.23  | K2O  | P2O5   | H2O       | CO2  | SO3 | Cl2O-1 | F2O-1  |       |
|                 | 60.32                                     |        | 0.37                                                  | 16.47        | 1.18         |             | 4.9         | 0.4        | 1.24      |    | 0      | 0     | 2.13 | 0.38   | 3.79      | 0    | 0   | 0      | 0      |       |
| opx             | mass                                      | =      | 0.31                                                  | (gm)         | density      | =           | 3.41        | (gm/cc)    | (analysis | in | mole   | %)    |      |        |           |      |     |        |        |       |
|                 | opx                                       |        | Na0.00Ca0.06Fe"0.70Mg1.17Fe""0.02Ti0.00Al0.10Si1.94O6 |              |              |             |             |            |           |    |        |       |      |        |           |      |     |        |        |       |
|                 | G                                         | =      | -4389.71                                              | (J)          | H            | =           | -3570.44    | (J)        | S         | =  | 0.66   | (J/K) | V    | =      | 0.09      | (cc) | Cp  | =      | 0.36   | (J/K) |
|                 | diopside                                  |        | clinoenstatit                                         | hedenbergite | alumno-buffo |             | essnite     | jadeite    |           |    |        |       |      |        |           |      |     |        |        |       |
|                 | -70.18                                    |        | 93.72                                                 | 70.02        | 3.94         |             | 6.06        | 0.14       |           |    |        |       |      |        |           |      |     |        |        |       |
| feldspar        | mass                                      | =      | 1.23                                                  | (gm)         | density      | =           | 2.66        | (gm/cc)    | (analysis | in | mole   | %)    |      |        |           |      |     |        |        |       |
|                 | K0.01Na0.35Ca0.64Al1.64Si2.36O8           |        |                                                       |              |              |             |             |            |           |    |        |       |      |        |           |      |     |        |        |       |
|                 | G                                         | =      | -20629.6                                              | (J)          | H            | =           | -17216.03   | (J)        | S         | =  | 2.77   | (J/K) | V    | =      | 0.46      | (cc) | Cp  | =      | 1.48   | (J/K) |
|                 | albite                                    |        | anorthite                                             | sanidine     |              |             |             |            |           |    |        |       |      |        |           |      |     |        |        |       |
|                 | 34.97                                     |        | 64.19                                                 | 0.84         |              |             |             |            |           |    |        |       |      |        |           |      |     |        |        |       |
| spinel          | mass                                      | =      | 0.2                                                   | (gm)         | density      | =           | 4.78        | (gm/cc)    | (analysis | in | mole   | %)    |      |        |           |      |     |        |        |       |
|                 | Fe"1.11Mg0.15Fe""1.26Al0.21Cr0.00Ti0.26O4 |        |                                                       |              |              |             |             |            |           |    |        |       |      |        |           |      |     |        |        |       |
|                 | G                                         | =      | -1576.91                                              | (J)          | H            | =           | -1080.85    | (J)        | S         | =  | 0.4    | (J/K) | V    | =      | 0.04      | (cc) | Cp  | =      | 0.19   | (J/K) |
|                 | chromite                                  |        | hercynite                                             | magnetite    | spinel       |             |             | ulvospinel |           |    |        |       |      |        |           |      |     |        |        |       |
|                 | 0                                         |        | -4.21                                                 | 62.84        | 14.95        |             |             | 26.42      |           |    |        |       |      |        |           |      |     |        |        |       |
| water           | mass                                      | =      | 0.89                                                  | (gm)         | density      | =           | 0.18        | (gm/cc)    |           |    |        |       |      |        |           |      |     |        |        |       |
|                 | H2O                                       |        |                                                       |              |              |             |             |            |           |    |        |       |      |        |           |      |     |        |        |       |

|                 |                                                                              |                                                                                       |                                 |                        |                          |                      |                   |                |              |               |                |              |             |                    |             |          |          |                |            |       |
|-----------------|------------------------------------------------------------------------------|---------------------------------------------------------------------------------------|---------------------------------|------------------------|--------------------------|----------------------|-------------------|----------------|--------------|---------------|----------------|--------------|-------------|--------------------|-------------|----------|----------|----------------|------------|-------|
|                 | G                                                                            | =                                                                                     | -21348.96                       | (J)                    | H                        | =                    | -10402.07         | (J)            | S            | =             | 8.87           | (J/K)        | V           | =                  | 4.82        | (cc)     | Cp       | =              | 2.8        | (J/K) |
| Total           | solids<br>G                                                                  | mass<br>=                                                                             | =<br>-47945.17                  | 2.62<br>(J)            | (gm)<br>H                | density<br>=         | =<br>-32269.39    | 0.48<br>(J)    | (gm/cc)<br>S | =             | 12.71          | (J/K)        | V           | =                  | 5.42        | (cc)     | Cp       | =              | 4.84       | (J/K) |
| Summary         | of                                                                           | all                                                                                   | fractionated                    | phases:                | (total                   | mass                 | =                 | 41.13          | grams)       |               |                |              |             |                    |             |          |          |                |            |       |
| opx             | mass<br>opx<br>G                                                             | =<br>NaO.00Ca0.07Fe" <sup>"</sup> 0.64Mg1.23Fe" <sup>"</sup> 0.02Ti0.00Al0.11Si1.93O6 | 3.25<br>(gm)                    | density<br>            | =<br>                    | 3.39                 | (gm/cc)           | (analysis      | in           | mole          | %)             |              |             |                    |             |          |          |                |            |       |
|                 | diopside<br>-63.61                                                           | clinoenstatit<br>93.22                                                                | hedenbergite<br>63.67           | alumno-buffo<br>4.19   | buffonite<br>-3.86       | essenite<br>6.25     | jadeite<br>0.13   |                | S            | =             | 7.08           | (J/K)        | V           | =                  | 0.96        | (cc)     | Cp       | =              | 3.87       | (J/K) |
| cpx             | mass<br>cpx<br>G                                                             | =<br>NaO.01Ca0.83Fe" <sup>"</sup> 0.24Mg0.75Fe" <sup>"</sup> 0.06Ti0.03Al0.24Si1.83O6 | 7.44<br>(gm)                    | density<br>            | =<br>                    | 3.3                  | (gm/cc)           | (analysis      | in           | mole          | %)             |              |             |                    |             |          |          |                |            |       |
|                 | diopside<br>41.95                                                            | clinoenstatit<br>15.49                                                                | hedenbergite<br>24.27           | alumno-buffo<br>10.61  | buffonite<br>-5.51       | essenite<br>11.75    | jadeite<br>1.43   |                | S            | =             | 15.88          | (J/K)        | V           | =                  | 2.25        | (cc)     | Cp       | =              | 8.54       | (J/K) |
| feldspar        | mass<br>K0.00Na0.22Ca0.78Al1.78Si2.22O8                                      | =<br>                                                                                 | 27.79<br>(gm)                   | density<br>            | =<br>                    | 2.68                 | (gm/cc)           | (analysis      | in           | mole          | %)             |              |             |                    |             |          |          |                |            |       |
|                 | G<br>albite<br>21.98                                                         | =<br>anorthite<br>77.55                                                               | -467288.07<br>sanidine<br>0.47  | (J)<br>                | H<br>                    | =<br>                | -390791.69<br>(J) | (J)<br>        | S<br>        | =<br>         | 62.01<br>(J/K) | V<br>        | =<br>       | 10.36<br>(cc)      | (cc)<br>    | Cp<br>   | =<br>    | 33.48<br>(J/K) | (J/K)<br>  |       |
| spinel          | mass<br>Fe" <sup>"</sup> 1.10Mg0.19Fe" <sup>"</sup> 1.17Al0.25Cr0.00Ti0.29O4 | =<br>                                                                                 | 2.65<br>(gm)                    | density<br>            | =<br>                    | 4.73                 | (gm/cc)           | (analysis      | in           | mole          | %)             |              |             |                    |             |          |          |                |            |       |
|                 | G<br>chromite<br>0                                                           | =<br>hercynite<br>-6.8                                                                | -21183.96<br>magnetite<br>58.49 | (J)<br>spinel<br>19.05 | H<br>ulvospinel<br>29.26 | =<br>                | -14681.55<br>(J)  | (J)<br>        | S<br>        | =<br>         | 5.27<br>(J/K)  | V<br>        | =<br>       | 0.56<br>(cc)       | (cc)<br>    | Cp<br>   | =<br>    | 2.44<br>(J/K)  | (J/K)<br>  |       |
| Viscosity       | of                                                                           | the                                                                                   | System:                         | 5.97                   | (log                     | 10                   | poise)            |                |              |               |                |              |             |                    |             |          |          |                |            |       |
| System          | mass<br>G                                                                    | =<br>=-1603785.98                                                                     | 99.43<br>(gm)                   | density<br>H           | =<br>                    | 2.27<br>=-1289260.06 | (gm/cc)<br>(J)    | S              | =            | 254.96        | (J/K)          | V            | =           | 43.79              | (cc)        | Cp       | =        | 131.62         | (J/K)      |       |
| Oxygen          | delta<br>G                                                                   | moles<br>=<br>=-747.7                                                                 | 0.00268325<br>(J)               | delta<br>H             | grams<br>=<br>=83.04     | 0.0858609<br>(J)     | S                 | =              | 0.67         | (J/K)         | V              | =            | 275.21      | (cc)               | Cp          | =        | 0.1      | (J/K)          |            |       |
| *****_*****     |                                                                              |                                                                                       |                                 |                        |                          |                      |                   |                |              |               |                |              |             |                    |             |          |          |                |            |       |
| Model 828 Bokan |                                                                              |                                                                                       |                                 |                        |                          |                      |                   |                |              |               |                |              |             |                    |             |          |          |                |            |       |
| Temp (oC)       | =                                                                            | 955.47                                                                                |                                 |                        |                          |                      |                   |                |              |               |                |              |             |                    |             |          |          |                |            |       |
| Constraint      | Flags:                                                                       | fO2                                                                                   | path                            | =                      | QFM                      | Fractionate          | Solids            |                |              |               |                |              |             |                    |             |          |          |                |            |       |
| Liquid          | mass<br>G                                                                    | =<br>=-878756.31                                                                      | 54.01<br>(gm)                   | density<br>H           | =<br>                    | 2.29<br>=-697918.11  | (gm/cc)<br>(J)    | viscosity<br>S | =<br>        | 4.1<br>147.19 | (log<br>(J/K)  | 10<br>V      | poise)<br>= | (analysis<br>23.56 | in<br>(cc)  | wt<br>Cp | %)<br>=  | 75.97          | (J/K)      |       |
|                 | SiO2<br>60.8                                                                 | TiO2<br>0.35                                                                          | Al2O3<br>16.3                   | Fe2O3<br>1.15          | Cr2O3<br>0               | FeO<br>4.72          | MnO<br>0.41       | MgO<br>1.17    | NiO<br>0     | CoO<br>0      | CaO<br>4.46    | Na2O<br>4.27 | K2O<br>2.19 | P2O5<br>0.39       | H2O<br>3.81 | CO2<br>0 | SO3<br>0 | Cl2O-1<br>0    | F2O-1<br>0 |       |
| opx             | mass<br>opx<br>G                                                             | =<br>NaO.00Ca0.06Fe" <sup>"</sup> 0.71Mg1.16Fe" <sup>"</sup> 0.02Ti0.00Al0.10Si1.94O6 | 0.28<br>(gm)                    | density<br>            | =<br>                    | 3.42                 | (gm/cc)           | (analysis      | in           | mole          | %)             |              |             |                    |             |          |          |                |            |       |
|                 | diopside<br>-71.74                                                           | clinoenstatit<br>93.86                                                                | hedenbergite<br>71.49           | alumno-buffo<br>3.9    | buffonite<br>-3.67       | essenite<br>6.03     | jadeite<br>0.14   |                | S            | =             | 0.6            | (J/K)        | V           | =                  | 0.08        | (cc)     | Cp       | =              | 0.33       | (J/K) |
| feldspar        | mass<br>K0.01Na0.37Ca0.63Al1.63Si2.37O8                                      | =<br>                                                                                 | 1.16<br>(gm)                    | density<br>            | =<br>                    | 2.66                 | (gm/cc)           | (analysis      | in           | mole          | %)             |              |             |                    |             |          |          |                |            |       |
|                 | G<br>albite<br>36.58                                                         | =<br>anorthite<br>62.52                                                               | -19566.39<br>sanidine<br>0.9    | (J)<br>                | H<br>                    | =<br>                | -16342.61<br>(J)  | (J)<br>        | S<br>        | =<br>         | 2.62<br>(J/K)  | V<br>        | =<br>       | 0.44<br>(cc)       | (cc)<br>    | Cp<br>   | =<br>    | 1.41<br>(J/K)  | (J/K)<br>  |       |

|                 |                                          |                                                      |              |              |            |             |             |           |           |     |        |       |      |        |           |      |     |        |        |       |  |
|-----------------|------------------------------------------|------------------------------------------------------|--------------|--------------|------------|-------------|-------------|-----------|-----------|-----|--------|-------|------|--------|-----------|------|-----|--------|--------|-------|--|
| spinel          | mass                                     | =                                                    | 0.19         | (gm)         | density    | =           | 4.78        | (gm/cc)   | (analysis | in  | mole   | %)    |      |        |           |      |     |        |        |       |  |
|                 | Fe"1.12Mg0.14Fe"1.27Al0.21Cr0.00Ti0.26O4 |                                                      |              |              |            |             |             |           |           |     |        |       |      |        |           |      |     |        |        |       |  |
|                 | G                                        | =                                                    | -1445.32     | (J)          | H          | =           | -990.97     | (J)       | S         | =   | 0.37   | (J/K) | V    | =      | 0.04      | (cc) | Cp  | =      | 0.17   | (J/K) |  |
|                 | chromite                                 |                                                      | hercynite    | magnetite    | spinel     |             | ulvospinel  |           |           |     |        |       |      |        |           |      |     |        |        |       |  |
|                 | 0                                        |                                                      | -3.82        | 63.62        | 14.33      |             | 25.87       |           |           |     |        |       |      |        |           |      |     |        |        |       |  |
| water           | mass                                     | =                                                    | 0.94         | (gm)         | density    | =           | 0.18        | (gm/cc)   |           |     |        |       |      |        |           |      |     |        |        |       |  |
|                 | H2O                                      |                                                      |              |              |            |             |             |           |           |     |        |       |      |        |           |      |     |        |        |       |  |
|                 | G                                        | =                                                    | -22668.26    | (J)          | H          | =           | -11082.82   | (J)       | S         | =   | 9.43   | (J/K) | V    | =      | 5.1       | (cc) | Cp  | =      | 2.99   | (J/K) |  |
| Total           | solids                                   | mass                                                 | =            | 2.57         | (gm)       | density     | =           | 0.45      | (gm/cc)   |     |        |       |      |        |           |      |     |        |        |       |  |
|                 | G                                        | =                                                    | -47653.07    | (J)          | H          | =           | -31650.21   | (J)       | S         | =   | 13.03  | (J/K) | V    | =      | 5.66      | (cc) | Cp  | =      | 4.9    | (J/K) |  |
|                 |                                          |                                                      |              |              |            |             |             |           |           |     |        |       |      |        |           |      |     |        |        |       |  |
| Summary         | of                                       | all                                                  | fractionated | phases:      | (total     | mass        | =           | 42.86     | grams)    |     |        |       |      |        |           |      |     |        |        |       |  |
| opx             | mass                                     | =                                                    | 3.56         | (gm)         | density    | =           | 3.39        | (gm/cc)   | (analysis | in  | mole   | %)    |      |        |           |      |     |        |        |       |  |
|                 | opx                                      | Na0.00Ca0.07Fe"0.64Mg1.23Fe"0.02Ti0.00Al0.11Si1.93O6 |              |              |            |             |             |           |           |     |        |       |      |        |           |      |     |        |        |       |  |
|                 | G                                        | =                                                    | -51621.71    | (J)          | H          | =           | -42135.99   | (J)       | S         | =   | 7.72   | (J/K) | V    | =      | 1.05      | (cc) | Cp  | =      | 4.22   | (J/K) |  |
|                 | diopside                                 | clinoenstatit                                        | hedenbergite | alumno-buffo | buffonite  | essenite    | jadeite     |           |           |     |        |       |      |        |           |      |     |        |        |       |  |
|                 | -64.17                                   | 93.26                                                | 64.21        | 4.17         | -3.84      | 6.24        | 0.13        |           |           |     |        |       |      |        |           |      |     |        |        |       |  |
| cpx             | mass                                     | =                                                    | 7.44         | (gm)         | density    | =           | 3.3         | (gm/cc)   | (analysis | in  | mole   | %)    |      |        |           |      |     |        |        |       |  |
|                 | cpx                                      | Na0.01Ca0.83Fe"0.24Mg0.75Fe"0.06Ti0.03Al0.24Si1.83O6 |              |              |            |             |             |           |           |     |        |       |      |        |           |      |     |        |        |       |  |
|                 | G                                        | =                                                    | -114308.86   | (J)          | H          | =           | -94837.37   | (J)       | S         | =   | 15.85  | (J/K) | V    | =      | 2.25      | (cc) | Cp  | =      | 8.53   | (J/K) |  |
|                 | diopside                                 | clinoenstatit                                        | hedenbergite | alumno-buffo | buffonite  | essenite    | jadeite     |           |           |     |        |       |      |        |           |      |     |        |        |       |  |
|                 | 41.95                                    | 15.49                                                | 24.27        | 10.61        | -5.51      | 11.75       | 1.43        |           |           |     |        |       |      |        |           |      |     |        |        |       |  |
| feldspar        | mass                                     | =                                                    | 29.02        | (gm)         | density    | =           | 2.68        | (gm/cc)   | (analysis | in  | mole   | %)    |      |        |           |      |     |        |        |       |  |
|                 | K0.00Na0.23Ca0.77Al1.77Si2.23O8          |                                                      |              |              |            |             |             |           |           |     |        |       |      |        |           |      |     |        |        |       |  |
|                 | G                                        | =                                                    | -487549.6    | (J)          | H          | =           | -408143.51  | (J)       | S         | =   | 64.63  | (J/K) | V    | =      | 10.82     | (cc) | Cp  | =      | 34.94  | (J/K) |  |
|                 | albite                                   | anorthite                                            | sanidine     |              |            |             |             |           |           |     |        |       |      |        |           |      |     |        |        |       |  |
|                 | 22.53                                    | 76.99                                                | 0.48         |              |            |             |             |           |           |     |        |       |      |        |           |      |     |        |        |       |  |
| spinel          | mass                                     | =                                                    | 2.85         | (gm)         | density    | =           | 4.73        | (gm/cc)   | (analysis | in  | mole   | %)    |      |        |           |      |     |        |        |       |  |
|                 | Fe"1.10Mg0.19Fe"1.18Al0.24Cr0.00Ti0.29O4 |                                                      |              |              |            |             |             |           |           |     |        |       |      |        |           |      |     |        |        |       |  |
|                 | G                                        | =                                                    | -22715.67    | (J)          | H          | =           | -15763.85   | (J)       | S         | =   | 5.66   | (J/K) | V    | =      | 0.6       | (cc) | Cp  | =      | 2.62   | (J/K) |  |
|                 | chromite                                 | hercynite                                            | magnetite    | spinel       | ulvospinel |             |             |           |           |     |        |       |      |        |           |      |     |        |        |       |  |
|                 | 0                                        | -6.62                                                | 58.79        | 18.76        | 29.06      |             |             |           |           |     |        |       |      |        |           |      |     |        |        |       |  |
| Viscosity       | of                                       | the                                                  | System:      | 6.38         | (log       | 10          | poise)      |           |           |     |        |       |      |        |           |      |     |        |        |       |  |
| System          | mass                                     | =                                                    | 99.44        | (gm)         | density    | =           | 2.26        | (gm/cc)   |           |     |        |       |      |        |           |      |     |        |        |       |  |
|                 | G                                        | =                                                    | -1602605.22  | (J)          | H          | =           | -1290449.03 | (J)       | S         | =   | 254.07 | (J/K) | V    | =      | 43.94     | (cc) | Cp  | =      | 131.19 | (J/K) |  |
|                 |                                          |                                                      |              |              |            |             |             |           |           |     |        |       |      |        |           |      |     |        |        |       |  |
| Oxygen          | delta                                    | moles                                                | =            | 0.00284833   | delta      | grams       | =           | 0.0911432 |           |     |        |       |      |        |           |      |     |        |        |       |  |
|                 | G                                        | =                                                    | -790.13      | (J)          | H          | =           | 87.64       | (J)       | S         | =   | 0.71   | (J/K) | V    | =      | 290.96    | (cc) | Cp  | =      | 0.1    | (J/K) |  |
| *****-----***** |                                          |                                                      |              |              |            |             |             |           |           |     |        |       |      |        |           |      |     |        |        |       |  |
| Model 828 Bokan |                                          |                                                      |              |              |            |             |             |           |           |     |        |       |      |        |           |      |     |        |        |       |  |
| Temp (oC)       | =                                        | 950.47                                               |              |              |            |             |             |           |           |     |        |       |      |        |           |      |     |        |        |       |  |
| Constraint      | Flags:                                   | fO2                                                  | path         | =            | QFM        | Fractionate | Solids      |           |           |     |        |       |      |        |           |      |     |        |        |       |  |
| Liquid          | mass                                     | =                                                    | 52.43        | (gm)         | density    | =           | 2.29        | (gm/cc)   | viscosity | =   | 4.17   | (log  | 10   | poise) | (analysis | in   | wt  | %)     |        |       |  |
|                 | G                                        | =                                                    | -853354.04   | (J)          | H          | =           | -678824.48  | (J)       | S         | =   | 142.63 | (J/K) | V    | =      | 22.92     | (cc) | Cp  | =      | 73.63  | (J/K) |  |
|                 | SiO2                                     | TiO2                                                 | Al2O3        | Fe2O3        | Cr2O3      | FeO         | MnO         | MgO       | NiO       | CoO | CaO    | Na2O  | K2O  | P2O5   | H2O       | CO2  | SO3 | Cl2O-1 | F2O-1  |       |  |
|                 | 61.27                                    | 0.33                                                 | 16.13        | 1.12         | 0          | 4.54        | 0.42        | 1.09      | 0         | 0   | 4.32   | 4.31  | 2.25 | 0.4    | 3.82      | 0    | 0   | 0      | 0      |       |  |
| opx             | mass                                     | =                                                    | 0.25         | (gm)         | density    | =           | 3.42        | (gm/cc)   | (analysis | in  | mole   | %)    |      |        |           |      |     |        |        |       |  |
|                 | opx                                      | Na0.00Ca0.06Fe"0.73Mg1.15Fe"0.02Ti0.00Al0.10Si1.94O6 |              |              |            |             |             |           |           |     |        |       |      |        |           |      |     |        |        |       |  |



|           |                                                    |                                                             |                                   |                              |                          |                    |                             |                  |              |      |       |       |   |   |        |      |    |   |        |       |
|-----------|----------------------------------------------------|-------------------------------------------------------------|-----------------------------------|------------------------------|--------------------------|--------------------|-----------------------------|------------------|--------------|------|-------|-------|---|---|--------|------|----|---|--------|-------|
|           | G<br>diopside<br>-73.32                            | =<br>clinoenstatit<br>94.02                                 | -3606.55<br>hedenbergite<br>72.95 | (J)<br>alumino-buffo<br>3.85 | H<br>buffonite<br>-3.65  | =<br>essenite<br>6 | -2937.49<br>jadeite<br>0.14 | (J)              | S            | =    | 0.55  | (J/K) | V | = | 0.07   | (cc) | Cp | = | 0.3    | (J/K) |
| feldspar  | mass<br>K0.01Na0.38Ca0.61Al1.61Si2.39O8            | =                                                           | 1.11                              | (gm)                         | density                  | =                  | 2.65                        | (gm/cc)          | (analysis    | in   | mole  | %)    |   |   |        |      |    |   |        |       |
|           | G<br>albite<br>38.19                               | =<br>anorthite<br>60.84                                     | -18614.94<br>sanidine<br>0.96     | (J)                          | H                        | =                  | -15561.15                   | (J)              | S            | =    | 2.5   | (J/K) | V | = | 0.42   | (cc) | Cp | = | 1.34   | (J/K) |
| spinel    | mass<br>Fe""1.12Mg0.14Fe""1.29Al0.21Cr0.00Ti0.25O4 | =                                                           | 0.17                              | (gm)                         | density                  | =                  | 4.79                        | (gm/cc)          | (analysis    | in   | mole  | %)    |   |   |        |      |    |   |        |       |
|           | G<br>chromite<br>0                                 | =<br>hercynite<br>-3.44                                     | -1328.08<br>magnetite<br>64.39    | (J)<br>spinel<br>13.74       | H<br>ulvospinel<br>25.32 | =                  | -910.93                     | (J)              | S            | =    | 0.34  | (J/K) | V | = | 0.04   | (cc) | Cp | = | 0.16   | (J/K) |
| water     | mass<br>H2O<br>G                                   | =                                                           | 1                                 | (gm)                         | density                  | =                  | 0.19                        | (gm/cc)          |              |      |       |       |   |   |        |      |    |   |        |       |
|           | G                                                  | =                                                           | -23918.2                          | (J)                          | H                        | =                  | -11734.12                   | (J)              | S            | =    | 9.96  | (J/K) | V | = | 5.36   | (cc) | Cp | = | 3.17   | (J/K) |
| Total     | solids<br>G                                        | mass<br>=                                                   | -47467.76                         | 2.53<br>(J)                  | (gm)<br>H                | density<br>=       | -31143.69                   | 0.43<br>(J)      | (gm/cc)<br>S | =    | 13.34 | (J/K) | V | = | 5.89   | (cc) | Cp | = | 4.97   | (J/K) |
| Summary   | of                                                 | all                                                         | fractionated                      | phases:                      | (total                   | mass               | =                           | 44.48            | grams)       |      |       |       |   |   |        |      |    |   |        |       |
| opx       | mass<br>opx<br>G                                   | =<br>Na0.00Ca0.07Fe""0.65Mg1.22Fe""0.02Ti0.00Al0.11Si1.93O6 | 3.83<br>(gm)                      | density                      | =                        | 3.39               | (gm/cc)                     | (analysis        | in           | mole | %)    |       |   |   |        |      |    |   |        |       |
|           | G                                                  | =                                                           | -55521.21                         | (J)                          | H                        | =                  | -45366.38                   | (J)              | S            | =    | 8.3   | (J/K) | V | = | 1.13   | (cc) | Cp | = | 4.55   | (J/K) |
|           | diopside<br>-64.71                                 | clinoenstatit<br>93.31                                      | hedenbergite<br>64.73             | alumino-buffo<br>4.15        | buffonite<br>-3.83       | essenite<br>6.22   | jadeite<br>0.13             |                  |              |      |       |       |   |   |        |      |    |   |        |       |
| cpx       | mass<br>cpx<br>G                                   | =<br>Na0.01Ca0.83Fe""0.24Mg0.75Fe""0.06Ti0.03Al0.24Si1.83O6 | 7.44<br>(gm)                      | density                      | =                        | 3.3                | (gm/cc)                     | (analysis        | in           | mole | %)    |       |   |   |        |      |    |   |        |       |
|           | G                                                  | =                                                           | -114229.71                        | (J)                          | H                        | =                  | -94880.02                   | (J)              | S            | =    | 15.81 | (J/K) | V | = | 2.25   | (cc) | Cp | = | 8.53   | (J/K) |
|           | diopside<br>41.95                                  | clinoenstatit<br>15.49                                      | hedenbergite<br>24.27             | alumino-buffo<br>10.61       | buffonite<br>-5.51       | essenite<br>11.75  | jadeite<br>1.43             |                  |              |      |       |       |   |   |        |      |    |   |        |       |
| feldspar  | mass<br>K0.00Na0.23Ca0.76Al1.76Si2.24O8            | =                                                           | 30.18                             | (gm)                         | density                  | =                  | 2.68                        | (gm/cc)          | (analysis    | in   | mole  | %)    |   |   |        |      |    |   |        |       |
|           | G                                                  | =                                                           | -506735.73                        | (J)                          | H                        | =                  | -424628.8                   | (J)              | S            | =    | 67.1  | (J/K) | V | = | 11.25  | (cc) | Cp | = | 36.33  | (J/K) |
|           | albite<br>23.08                                    | anorthite<br>76.42                                          | sanidine<br>0.5                   |                              |                          |                    |                             |                  |              |      |       |       |   |   |        |      |    |   |        |       |
| spinel    | mass<br>Fe""1.10Mg0.18Fe""1.18Al0.24Cr0.00Ti0.29O4 | =                                                           | 3.03                              | (gm)                         | density                  | =                  | 4.74                        | (gm/cc)          | (analysis    | in   | mole  | %)    |   |   |        |      |    |   |        |       |
|           | G                                                  | =                                                           | -24114.11                         | (J)                          | H                        | =                  | -16757.15                   | (J)              | S            | =    | 6.01  | (J/K) | V | = | 0.64   | (cc) | Cp | = | 2.79   | (J/K) |
|           | chromite<br>0                                      | hercynite<br>-6.45                                          | magnetite<br>59.08                | spinel<br>18.49              | ulvospinel<br>28.87      |                    |                             |                  |              |      |       |       |   |   |        |      |    |   |        |       |
| Viscosity | of                                                 | the                                                         | System:                           | 6.97                         | (log                     | 10                 | poise)                      |                  |              |      |       |       |   |   |        |      |    |   |        |       |
| System    | mass<br>G                                          | =<br>=                                                      | 99.44<br>-1601422.55              | (gm)<br>(J)                  | density<br>H             | =<br>=             | 2.26<br>-1291600.52         | (gm/cc)<br>(J)   | S            | =    | 253.2 | (J/K) | V | = | 44.08  | (cc) | Cp | = | 130.79 | (J/K) |
| Oxygen    | delta<br>G                                         | moles<br>=                                                  | =<br>-828.94                      | 0.00300181<br>(J)            | delta<br>H               | grams<br>=         | =<br>91.83                  | 0.0960544<br>(J) | S            | =    | 0.75  | (J/K) | V | = | 305.39 | (cc) | Cp | = | 0.11   | (J/K) |

\*\*\*\*\*\_\*\*\*\*\*

Model 828 Bokan

Temp (oC) = 945.47

|            |                                          |                                                       |              |               |            |             |            |         |           |     |        |       |      |        |           |      |     |        |        |       |  |
|------------|------------------------------------------|-------------------------------------------------------|--------------|---------------|------------|-------------|------------|---------|-----------|-----|--------|-------|------|--------|-----------|------|-----|--------|--------|-------|--|
| Constraint | Flags:                                   | fO2                                                   | path         | =             | QFM        | Fractionate | Solids     |         |           |     |        |       |      |        |           |      |     |        |        |       |  |
| Liquid     | mass                                     | =                                                     | 50.94        | (gm)          | density    | =           | 2.28       | (gm/cc) | viscosity | =   | 4.25   | (log  | 10   | poise) | (analysis | in   | wt  | %)     |        |       |  |
|            | G                                        | =                                                     | -829314.25   | (J)           | H          | =           | -660752.01 | (J)     | S         | =   | 138.32 | (J/K) | V    | =      | 22.31     | (cc) | Cp  | =      | 71.42  | (J/K) |  |
|            | SiO2                                     | TiO2                                                  | Al2O3        | Fe2O3         | Cr2O3      | FeO         | MnO        | MgO     | NiO       | CoO | CaO    | Na2O  | K2O  | P2O5   | H2O       | CO2  | SO3 | Cl2O-1 | F2O-1  |       |  |
|            | 61.72                                    | 0.31                                                  | 15.96        | 1.09          | 0          | 4.38        | 0.43       | 1.03    | 0         | 0   | 4.19   | 4.34  | 2.32 | 0.41   | 3.83      | 0    | 0   | 0      | 0      |       |  |
| opx        | mass                                     | =                                                     | 0.23         | (gm)          | density    | =           | 3.43       | (gm/cc) | (analysis | in  | mole   | %)    |      |        |           |      |     |        |        |       |  |
|            | opx                                      | Na0.00Ca0.06Fe"0.74Mg"0.14Fe"0.02Ti0.00Al0.10Si1.94O6 |              |               |            |             |            |         |           |     |        |       |      |        |           |      |     |        |        |       |  |
|            | G                                        | =                                                     | -3282.55     | (J)           | H          | =           | -2675.44   | (J)     | S         | =   | 0.5    | (J/K) | V    | =      | 0.07      | (cc) | Cp  | =      | 0.27   | (J/K) |  |
|            | diopside                                 | clinoenstatit                                         | hedenbergite | alumino-buffo | buffonite  | essenite    | jadeite    |         |           |     |        |       |      |        |           |      |     |        |        |       |  |
|            | -74.92                                   | 94.17                                                 | 74.43        | 3.82          | -3.62      | 5.98        | 0.14       |         |           |     |        |       |      |        |           |      |     |        |        |       |  |
| feldspar   | mass                                     | =                                                     | 1.06         | (gm)          | density    | =           | 2.65       | (gm/cc) | (analysis | in  | mole   | %)    |      |        |           |      |     |        |        |       |  |
|            | K0.01Na0.40Ca0.59Al1.59Si2.41O8          |                                                       |              |               |            |             |            |         |           |     |        |       |      |        |           |      |     |        |        |       |  |
|            | G                                        | =                                                     | -17757.97    | (J)           | H          | =           | -14857.42  | (J)     | S         | =   | 2.38   | (J/K) | V    | =      | 0.4       | (cc) | Cp  | =      | 1.28   | (J/K) |  |
|            | albite                                   | anorthite                                             | sanidine     |               |            |             |            |         |           |     |        |       |      |        |           |      |     |        |        |       |  |
|            | 39.81                                    | 59.16                                                 | 1.03         |               |            |             |            |         |           |     |        |       |      |        |           |      |     |        |        |       |  |
| spinel     | mass                                     | =                                                     | 0.16         | (gm)          | density    | =           | 4.8        | (gm/cc) | (analysis | in  | mole   | %)    |      |        |           |      |     |        |        |       |  |
|            | Fe"1.12Mg0.13Fe"1.30Al0.20Cr0.00Ti0.25O4 |                                                       |              |               |            |             |            |         |           |     |        |       |      |        |           |      |     |        |        |       |  |
|            | G                                        | =                                                     | -1223.08     | (J)           | H          | =           | -839.29    | (J)     | S         | =   | 0.31   | (J/K) | V    | =      | 0.03      | (cc) | Cp  | =      | 0.15   | (J/K) |  |
|            | chromite                                 | hercynite                                             | magnetite    | spinel        | ulvospinel |             |            |         |           |     |        |       |      |        |           |      |     |        |        |       |  |
|            | 0                                        | -3.09                                                 | 65.14        | 13.18         | 24.78      |             |            |         |           |     |        |       |      |        |           |      |     |        |        |       |  |
| water      | mass                                     | =                                                     | 1.05         | (gm)          | density    | =           | 0.19       | (gm/cc) |           |     |        |       |      |        |           |      |     |        |        |       |  |
|            | H2O                                      |                                                       |              |               |            |             |            |         |           |     |        |       |      |        |           |      |     |        |        |       |  |
|            | G                                        | =                                                     | -25105.61    | (J)           | H          | =           | -12359.03  | (J)     | S         | =   | 10.46  | (J/K) | V    | =      | 5.61      | (cc) | Cp  | =      | 3.34   | (J/K) |  |
| Total      | solids                                   | mass                                                  | =            | 2.5           | (gm)       | density     | =          | 0.41    | (gm/cc)   |     |        |       |      |        |           |      |     |        |        |       |  |
|            | G                                        | =                                                     | -47369.21    | (J)           | H          | =           | -30731.18  | (J)     | S         | =   | 13.65  | (J/K) | V    | =      | 6.11      | (cc) | Cp  | =      | 5.04   | (J/K) |  |
| Summary    | of                                       | all                                                   | fractionated | phases:       | (total     | mass        | =          | 46.01   | grams)    |     |        |       |      |        |           |      |     |        |        |       |  |
| opx        | mass                                     | =                                                     | 4.08         | (gm)          | density    | =           | 3.4        | (gm/cc) | (analysis | in  | mole   | %)    |      |        |           |      |     |        |        |       |  |
|            | opx                                      | Na0.00Ca0.07Fe"0.65Mg1.22Fe"0.02Ti0.00Al0.10Si1.93O6  |              |               |            |             |            |         |           |     |        |       |      |        |           |      |     |        |        |       |  |
|            | G                                        | =                                                     | -59051.62    | (J)           | H          | =           | -48301.96  | (J)     | S         | =   | 8.82   | (J/K) | V    | =      | 1.2       | (cc) | Cp  | =      | 4.84   | (J/K) |  |
|            | diopside                                 | clinoenstatit                                         | hedenbergite | alumino-buffo | buffonite  | essenite    | jadeite    |         |           |     |        |       |      |        |           |      |     |        |        |       |  |
|            | -65.24                                   | 93.35                                                 | 65.23        | 4.13          | -3.82      | 6.21        | 0.13       |         |           |     |        |       |      |        |           |      |     |        |        |       |  |
| cpx        | mass                                     | =                                                     | 7.44         | (gm)          | density    | =           | 3.3        | (gm/cc) | (analysis | in  | mole   | %)    |      |        |           |      |     |        |        |       |  |
|            | cpx                                      | Na0.01Ca0.83Fe"0.24Mg0.75Fe"0.06Ti0.03Al0.24Si1.83O6  |              |               |            |             |            |         |           |     |        |       |      |        |           |      |     |        |        |       |  |
|            | G                                        | =                                                     | -114150.73   | (J)           | H          | =           | -94922.64  | (J)     | S         | =   | 15.78  | (J/K) | V    | =      | 2.25      | (cc) | Cp  | =      | 8.52   | (J/K) |  |
|            | diopside                                 | clinoenstatit                                         | hedenbergite | alumino-buffo | buffonite  | essenite    | jadeite    |         |           |     |        |       |      |        |           |      |     |        |        |       |  |
|            | 41.95                                    | 15.49                                                 | 24.27        | 10.61         | -5.51      | 11.75       | 1.43       |         |           |     |        |       |      |        |           |      |     |        |        |       |  |
| feldspar   | mass                                     | =                                                     | 31.28        | (gm)          | density    | =           | 2.68       | (gm/cc) | (analysis | in  | mole   | %)    |      |        |           |      |     |        |        |       |  |
|            | K0.01Na0.24Ca0.76Al1.76Si2.24O8          |                                                       |              |               |            |             |            |         |           |     |        |       |      |        |           |      |     |        |        |       |  |
|            | G                                        | =                                                     | -524958.89   | (J)           | H          | =           | -440339.16 | (J)     | S         | =   | 69.44  | (J/K) | V    | =      | 11.67     | (cc) | Cp  | =      | 37.64  | (J/K) |  |
|            | albite                                   | anorthite                                             | sanidine     |               |            |             |            |         |           |     |        |       |      |        |           |      |     |        |        |       |  |
|            | 23.62                                    | 75.87                                                 | 0.52         |               |            |             |            |         |           |     |        |       |      |        |           |      |     |        |        |       |  |
| spinel     | mass                                     | =                                                     | 3.2          | (gm)          | density    | =           | 4.74       | (gm/cc) | (analysis | in  | mole   | %)    |      |        |           |      |     |        |        |       |  |
|            | Fe"1.10Mg0.18Fe"1.19Al0.24Cr0.00Ti0.29O4 |                                                       |              |               |            |             |            |         |           |     |        |       |      |        |           |      |     |        |        |       |  |
|            | G                                        | =                                                     | -25393.77    | (J)           | H          | =           | -17671.24  | (J)     | S         | =   | 6.34   | (J/K) | V    | =      | 0.68      | (cc) | Cp  | =      | 2.94   | (J/K) |  |
|            | chromite                                 | hercynite                                             | magnetite    | spinel        | ulvospinel |             |            |         |           |     |        |       |      |        |           |      |     |        |        |       |  |
|            | 0                                        | -6.29                                                 | 59.36        | 18.24         | 28.68      |             |            |         |           |     |        |       |      |        |           |      |     |        |        |       |  |
| Viscosity  | of                                       | the                                                   | System:      | 8.32          | (log       | 10          | poise)     |         |           |     |        |       |      |        |           |      |     |        |        |       |  |
| System     | mass                                     | =                                                     | 99.45        | (gm)          | density    | =           | 2.25       | (gm/cc) |           |     |        |       |      |        |           |      |     |        |        |       |  |
|            | G                                        | =                                                     | -1600238.48  | (J)           | H          | =           | -1292718.2 | (J)     | S         | =   | 252.35 | (J/K) | V    | =      | 44.21     | (cc) | Cp  | =      | 130.41 | (J/K) |  |

|                 |                                              |                           |                                     |                                          |                     |                   |                    |                      |                |         |                |               |         |        |                 |                   |           |        |         |       |
|-----------------|----------------------------------------------|---------------------------|-------------------------------------|------------------------------------------|---------------------|-------------------|--------------------|----------------------|----------------|---------|----------------|---------------|---------|--------|-----------------|-------------------|-----------|--------|---------|-------|
| Oxygen          | delta<br>G                                   | moles<br>=                | =<br>-864.47                        | =<br>0.00314475<br>(J)                   | delta<br>H          | grams<br>=        | =<br>95.64         | =<br>0.100628<br>(J) | S              | =       | 0.79           | (J/K)         | V       | =      | 318.62          | (cc)              | Cp        | =      | 0.11    | (J/K) |
| *****-----***** |                                              |                           |                                     |                                          |                     |                   |                    |                      |                |         |                |               |         |        |                 |                   |           |        |         |       |
| Model 828 Bokan |                                              |                           |                                     |                                          |                     |                   |                    |                      |                |         |                |               |         |        |                 |                   |           |        |         |       |
| Temp (oC)       | =                                            | 940.47                    |                                     |                                          |                     |                   |                    |                      |                |         |                |               |         |        |                 |                   |           |        |         |       |
| Constraint      | Flags:                                       | fO2                       | path                                | =                                        | QFM                 | Fractionate       | Solids             |                      |                |         |                |               |         |        |                 |                   |           |        |         |       |
| Liquid          | mass<br>G                                    | =<br>=                    | 49.52<br>-806503.51                 | (gm)<br>(J)                              | density<br>H        | =<br>=            | 2.28<br>-643599.32 | (gm/cc)<br>(J)       | viscosity<br>S | =<br>=  | 4.32<br>134.23 | (log<br>(J/K) | 10<br>V | =<br>= | poise)<br>21.73 | (analysis<br>(cc) | in<br>Cp  | =<br>= | wt<br>= | 69.32 |
|                 | SiO2                                         | TiO2                      | Al2O3                               | Fe2O3                                    | Cr2O3               | FeO               | MnO                | MgO                  | NiO            | CoO     | CaO            | Na2O          | K2O     | P2O5   | H2O             | CO2               | SO3       | Cl2O-1 | F2O-1   |       |
|                 | 62.17                                        | 0.29                      | 15.79                               | 1.06                                     | 0                   | 4.21              | 0.44               | 0.96                 | 0              | 0       | 4.06           | 4.37          | 2.38    | 0.42   | 3.84            | 0                 | 0         | 0      | 0       |       |
| opx             | mass<br>opx<br>G                             | =<br>Na0.00Ca0.06Fe"<br>= | 0.21<br>0.76Mg1.12Fe"<br>-2994.96   | (gm)<br>"0.02Ti0.00Al0.10Si1.94O6<br>(J) | density<br>H        | =<br>=            | 3.44<br>-2442.73   | (gm/cc)<br>(J)       | (analysis<br>S | in<br>= | mole<br>0.46   | (%)<br>(J/K)  |         |        |                 |                   | (cc)<br>V | =<br>= | Cp<br>= | 0.25  |
|                 | diopside<br>-76.53                           | clinoenstatit<br>94.34    | hedenbergite<br>75.92               | alumino-buffo<br>3.78                    | buffonite<br>-3.6   | essenite<br>5.95  | jadeite<br>0.14    |                      |                |         |                |               |         |        |                 |                   |           |        |         |       |
| feldspar        | mass<br>K0.01Na0.41Ca0.57Al1.57Si2.43O8<br>G | =<br>=                    | 1.01<br>-16981.15                   | (gm)<br>(J)                              | density<br>H        | =<br>=            | 2.65<br>-14219.63  | (gm/cc)<br>(J)       | (analysis<br>S | in<br>= | mole<br>2.28   | (%)<br>(J/K)  |         |        |                 |                   | (cc)<br>V | =<br>= | Cp<br>= | 1.23  |
|                 | albite<br>41.42                              | anorthite<br>57.48        | sanidine<br>1.1                     |                                          |                     |                   |                    |                      |                |         |                |               |         |        |                 |                   |           |        |         |       |
| spinel          | mass<br>Fe"<br>G                             | =<br>=                    | 0.15<br>-1128.59                    | (gm)<br>(J)                              | density<br>H        | =<br>=            | 4.81<br>-774.85    | (gm/cc)<br>(J)       | (analysis<br>S | in<br>= | mole<br>0.29   | (%)<br>(J/K)  |         |        |                 |                   | (cc)<br>V | =<br>= | Cp<br>= | 0.14  |
|                 | chromite<br>0                                | hercynite<br>-2.77        | magnetite<br>65.88                  | spinel<br>12.64                          | ulvospinel<br>24.24 |                   |                    |                      |                |         |                |               |         |        |                 |                   |           |        |         |       |
| water           | mass<br>H2O<br>G                             | =<br>=                    | 1.1<br>-26236.31                    | (gm)<br>(J)                              | density<br>H        | =<br>=            | 0.19<br>-12960.12  | (gm/cc)<br>(J)       |                | S<br>=  |                |               |         |        |                 |                   | (cc)<br>V | =<br>= | Cp<br>= | 3.51  |
| Total           | solids<br>G                                  | mass<br>=                 | =<br>-47341.01                      | 2.47<br>(J)                              | (gm)<br>H           | density<br>=      | =<br>-30397.33     | 0.39<br>(J)          | (gm/cc)<br>S   | =<br>=  | 13.96          | (J/K)         |         |        |                 |                   | (cc)<br>V | =<br>= | Cp<br>= | 5.12  |
| Summary         | of                                           | all                       | fractionated                        | phases:                                  | (total              | mass              | =                  | 47.46                | grams)         |         |                |               |         |        |                 |                   |           |        |         |       |
| opx             | mass<br>opx<br>G                             | =<br>Na0.00Ca0.06Fe"<br>= | 4.31<br>0.66Mg1.21Fe"<br>-62255.75  | (gm)<br>"0.02Ti0.00Al0.10Si1.93O6<br>(J) | density<br>H        | =<br>=            | 3.4<br>-50976.87   | (gm/cc)<br>(J)       | (analysis<br>S | in<br>= | mole<br>9.29   | (%)<br>(J/K)  |         |        |                 |                   | (cc)<br>V | =<br>= | Cp<br>= | 5.11  |
|                 | diopside<br>-65.74                           | clinoenstatit<br>93.39    | hedenbergite<br>65.72               | alumino-buffo<br>4.12                    | buffonite<br>-3.81  | essenite<br>6.2   | jadeite<br>0.13    |                      |                |         |                |               |         |        |                 |                   |           |        |         |       |
| cpx             | mass<br>cpx<br>G                             | =<br>Na0.01Ca0.83Fe"<br>= | 7.44<br>0.24Mg0.75Fe"<br>-114071.92 | (gm)<br>"0.06Ti0.03Al0.24Si1.83O6<br>(J) | density<br>H        | =<br>=            | 3.3<br>-94965.25   | (gm/cc)<br>(J)       | (analysis<br>S | in<br>= | mole<br>15.74  | (%)<br>(J/K)  |         |        |                 |                   | (cc)<br>V | =<br>= | Cp<br>= | 8.52  |
|                 | diopside<br>41.95                            | clinoenstatit<br>15.49    | hedenbergite<br>24.27               | alumino-buffo<br>10.61                   | buffonite<br>-5.51  | essenite<br>11.75 | jadeite<br>1.43    |                      |                |         |                |               |         |        |                 |                   |           |        |         |       |
| feldspar        | mass<br>K0.01Na0.24Ca0.75Al1.75Si2.25O8<br>G | =<br>=                    | 32.34<br>-542314.19                 | (gm)<br>(J)                              | density<br>H        | =<br>=            | 2.68<br>-455352.03 | (gm/cc)<br>(J)       | (analysis<br>S | in<br>= | mole<br>71.66  | (%)<br>(J/K)  |         |        |                 |                   | (cc)<br>V | =<br>= | Cp<br>= | 38.89 |
|                 | albite<br>24.15                              | anorthite<br>75.32        | sanidine<br>0.53                    |                                          |                     |                   |                    |                      |                |         |                |               |         |        |                 |                   |           |        |         |       |
| spinel          | mass                                         | =                         | 3.36                                | (gm)                                     | density             | =                 | 4.75               | (gm/cc)              | (analysis      | in      | mole           | (%)           |         |        |                 |                   |           |        |         |       |

|                 |                                                                        |                                                                              |                                        |                                      |                                    |                            |                                     |                               |                            |                    |                               |                               |                        |                            |                                   |                        |                      |                        |                     |       |
|-----------------|------------------------------------------------------------------------|------------------------------------------------------------------------------|----------------------------------------|--------------------------------------|------------------------------------|----------------------------|-------------------------------------|-------------------------------|----------------------------|--------------------|-------------------------------|-------------------------------|------------------------|----------------------------|-----------------------------------|------------------------|----------------------|------------------------|---------------------|-------|
|                 | Fe"1.10Mg0.18Fe"1.19Al0.24Cr0.00Ti0.28O4                               |                                                                              |                                        |                                      |                                    |                            |                                     |                               |                            |                    |                               |                               |                        |                            |                                   |                        |                      |                        |                     |       |
|                 | G<br>chromite<br>0                                                     | =<br>hercynite<br>-6.14                                                      | -26567.02<br>magnetite<br>59.63        | (J)<br>spinel<br>18.01               | H<br>ulvospinel<br>28.5            | =                          | -18514.45                           | (J)                           | S                          | =                  | 6.64                          | (J/K)                         | V                      | =                          | 0.71                              | (cc)                   | Cp                   | =                      | 3.09                | (J/K) |
| Viscosity       | of                                                                     | the                                                                          | System                                 | cannot                               | be                                 | computed.                  |                                     |                               |                            |                    |                               |                               |                        |                            |                                   |                        |                      |                        |                     |       |
| System          | mass<br>G                                                              | =<br>=                                                                       | 99.45<br>-1599053.4                    | (gm)<br>(J)                          | density<br>H                       | =<br>=                     | 2.24<br>-1293805.25                 | (gm/cc)<br>(J)                | S                          | =                  | 251.52                        | (J/K)                         | V                      | =                          | 44.33                             | (cc)                   | Cp                   | =                      | 130.05              | (J/K) |
| Oxygen          | delta<br>G                                                             | moles<br>=                                                                   | =<br>-897.01                           | 0.00327805<br>(J)                    | delta<br>H                         | grams<br>=                 | =<br>99.11                          | 0.104894<br>(J)               | S                          | =                  | 0.82                          | (J/K)                         | V                      | =                          | 330.77                            | (cc)                   | Cp                   | =                      | 0.12                | (J/K) |
| *****           |                                                                        |                                                                              |                                        |                                      |                                    |                            |                                     |                               |                            |                    |                               |                               |                        |                            |                                   |                        |                      |                        |                     |       |
| Model 828 Bokan |                                                                        |                                                                              |                                        |                                      |                                    |                            |                                     |                               |                            |                    |                               |                               |                        |                            |                                   |                        |                      |                        |                     |       |
| Temp (oC)       | =                                                                      | 935.47                                                                       |                                        |                                      |                                    |                            |                                     |                               |                            |                    |                               |                               |                        |                            |                                   |                        |                      |                        |                     |       |
| Constraint      | Flags:                                                                 | fO2                                                                          | path                                   | =                                    | QFM                                | Fractionate                | Solids                              |                               |                            |                    |                               |                               |                        |                            |                                   |                        |                      |                        |                     |       |
| Liquid          | mass<br>G<br>SiO2<br>62.61                                             | =<br>=<br>TiO2<br>0.27                                                       | 48.18<br>-784807.69<br>Al2O3<br>15.62  | (gm)<br>(J)<br>Fe2O3<br>1.03         | density<br>H<br>Cr2O3<br>0         | =<br>=<br>FeO<br>4.05      | 2.28<br>-627279.81<br>MnO<br>0.46   | (gm/cc)<br>(J)<br>MgO<br>0.91 | viscosity<br>S<br>NiO<br>0 | =<br>=<br>CoO<br>0 | 4.39<br>130.34<br>CaO<br>3.93 | (log<br>(J/K)<br>Na2O<br>4.39 | 10<br>V<br>K2O<br>2.44 | poise<br>=<br>P2O5<br>0.44 | (analysis<br>21.17<br>H2O<br>3.85 | in<br>(cc)<br>CO2<br>0 | wt<br>Cp<br>SO3<br>0 | (%<br>=<br>Cl2O-1<br>0 | 67.34<br>F2O-1<br>0 | (J/K) |
| opx             | mass<br>opx<br>G<br>diopside<br>-78.15                                 | =<br>Na0.00Ca0.05Fe"0.77Mg1.11Fe"0.02Ti0.00Al0.10Si1.94O6<br>=<br>-2738.67   | 0.2<br>hedenbergite<br>77.41           | (gm)<br>(J)<br>alumino-buffo<br>3.75 | density<br>H<br>buffonite<br>-3.58 | =<br>=<br>essenite<br>5.93 | 3.44<br>-2235.25<br>jadeite<br>0.14 | (gm/cc)<br>(J)                | (analysis<br>S             | in<br>=<br>=       | mole<br>=<br>=                | (%<br>(J/K)                   | V                      | =                          | 0.06<br>(cc)                      | Cp                     | =                    | 0.23                   | (J/K)               |       |
| feldspar        | mass<br>K0.01Na0.43Ca0.56Al1.56Si2.44O8<br>G<br>albite<br>43.02        | =<br>=<br>anorthite<br>55.8                                                  | 0.97<br>-16272.55<br>sanidine<br>1.18  | (gm)<br>(J)                          | density<br>H                       | =<br>=<br>=                | 2.64<br>-13637.96                   | (gm/cc)<br>(J)                | (analysis<br>S             | in<br>=<br>=       | mole<br>=<br>=                | (%<br>(J/K)                   | V                      | =                          | 0.37<br>(cc)                      | Cp                     | =                    | 1.18                   | (J/K)               |       |
| spinel          | mass<br>Fe"1.12Mg0.12Fe"1.33Al0.19Cr0.00Ti0.24O4<br>G<br>chromite<br>0 | =<br>=<br>hercynite<br>-2.46                                                 | 0.14<br>-1043.19<br>magnetite<br>66.62 | (gm)<br>(J)<br>spinel<br>12.14       | density<br>H<br>ulvospinel<br>23.7 | =<br>=<br>=                | 4.81<br>-716.64                     | (gm/cc)<br>(J)                | (analysis<br>S             | in<br>=<br>=       | mole<br>=<br>=                | (%<br>(J/K)                   | V                      | =                          | 0.03<br>(cc)                      | Cp                     | =                    | 0.13                   | (J/K)               |       |
| water           | mass<br>H2O<br>G                                                       | =<br>=<br>=                                                                  | 1.15<br>-27315.25                      | (gm)<br>(J)                          | density<br>H                       | =<br>=<br>=                | 0.19<br>-13539.6                    | (gm/cc)<br>(J)                |                            |                    |                               |                               |                        |                            |                                   |                        |                      |                        |                     |       |
| Total           | solids<br>G                                                            | mass<br>=<br>=                                                               | =<br>-47369.67                         | 2.45<br>(J)                          | (gm)<br>H                          | density<br>=<br>=          | =<br>-30129.44                      | 0.38<br>(J)                   | (gm/cc)<br>S               | =<br>=<br>=        | 14.26                         | (J/K)                         | V                      | =                          | 6.5                               | (cc)                   | Cp                   | =                      | 5.2                 | (J/K) |
| Summary         | of                                                                     | all                                                                          | fractionated                           | phases:                              | (total                             | mass                       | =                                   | 48.82                         | grams)                     |                    |                               |                               |                        |                            |                                   |                        |                      |                        |                     |       |
| opx             | mass<br>opx<br>G<br>diopside<br>-66.24                                 | =<br>Na0.00Ca0.06Fe"0.66Mg1.21Fe"0.02Ti0.00Al0.10Si1.94O6<br>=<br>-65170.23  | 4.52<br>hedenbergite<br>93.44          | (gm)<br>(J)<br>alumino-buffo<br>4.1  | density<br>H<br>buffonite<br>-3.8  | =<br>=<br>essenite<br>6.19 | 3.4<br>-53420.32<br>jadeite<br>0.13 | (gm/cc)<br>(J)                | (analysis<br>S             | in<br>=<br>=       | mole<br>=<br>=                | (%<br>(J/K)                   | V                      | =                          | 1.33<br>(cc)                      | Cp                     | =                    | 5.35                   | (J/K)               |       |
| cpx             | mass<br>cpx<br>G<br>diopside                                           | =<br>Na0.01Ca0.83Fe"0.24Mg0.75Fe"0.06Ti0.03Al0.24Si1.83O6<br>=<br>-113993.29 | 7.44<br>hedenbergite<br>66.18          | (gm)<br>(J)<br>alumino-buffo         | density<br>H<br>buffonite          | =<br>=<br>essenite         | 3.31<br>-95007.83<br>jadeite        | (gm/cc)<br>(J)                | (analysis<br>S             | in<br>=<br>=       | mole<br>=<br>=                | (%<br>(J/K)                   | V                      | =                          | 2.25<br>(cc)                      | Cp                     | =                    | 8.51                   | (J/K)               |       |

|                 |                                          |        |                                                      |           |            |             |            |          |           |    |        |       |    |        |           |      |    |    |        |       |
|-----------------|------------------------------------------|--------|------------------------------------------------------|-----------|------------|-------------|------------|----------|-----------|----|--------|-------|----|--------|-----------|------|----|----|--------|-------|
|                 | 41.95                                    | 15.49  | 24.27                                                | 10.61     | -5.51      | 11.75       | 1.43       |          |           |    |        |       |    |        |           |      |    |    |        |       |
| feldspar        | mass                                     | =      | 33.35                                                | (gm)      | density    | =           | 2.68       | (gm/cc)  | (analysis | in | mole   | %)    |    |        |           |      |    |    |        |       |
|                 | K0.01Na0.25Ca0.75Al1.75Si2.25O8          |        |                                                      |           |            |             |            |          |           |    |        |       |    |        |           |      |    |    |        |       |
|                 | G                                        | =      | -55882.32                                            | (J)       | H          | =           | -469733.07 | (J)      | S         | =  | 73.76  | (J/K) | V  | =      | 12.44     | (cc) | Cp | =  | 40.09  | (J/K) |
|                 | albite                                   | =      | anorthite                                            |           |            |             |            |          |           |    |        |       |    |        |           |      |    |    |        |       |
|                 | 24.68                                    |        | 74.77                                                |           |            |             |            |          |           |    |        |       |    |        |           |      |    |    |        |       |
|                 |                                          |        | 0.55                                                 |           |            |             |            |          |           |    |        |       |    |        |           |      |    |    |        |       |
| spinel          | mass                                     | =      | 3.51                                                 | (gm)      | density    | =           | 4.75       | (gm/cc)  | (analysis | in | mole   | %)    |    |        |           |      |    |    |        |       |
|                 | Fe"1.11Mg0.18Fe"1.20Al0.24Cr0.00Ti0.28O4 |        |                                                      |           |            |             |            |          |           |    |        |       |    |        |           |      |    |    |        |       |
|                 | G                                        | =      | -27644.5                                             | (J)       | H          | =           | -19293.93  | (J)      | S         | =  | 6.91   | (J/K) | V  | =      | 0.74      | (cc) | Cp | =  | 3.22   | (J/K) |
|                 | chromite                                 | =      | hercynite                                            |           |            |             |            |          |           |    |        |       |    |        |           |      |    |    |        |       |
|                 | 0                                        |        | -6                                                   |           |            |             |            |          |           |    |        |       |    |        |           |      |    |    |        |       |
|                 |                                          |        | 59.89                                                |           |            |             |            |          |           |    |        |       |    |        |           |      |    |    |        |       |
|                 |                                          |        |                                                      | spinel    |            |             |            |          |           |    |        |       |    |        |           |      |    |    |        |       |
|                 |                                          |        |                                                      | 17.79     |            |             |            |          |           |    |        |       |    |        |           |      |    |    |        |       |
|                 |                                          |        |                                                      |           | ulvospinel |             |            |          |           |    |        |       |    |        |           |      |    |    |        |       |
|                 |                                          |        |                                                      |           | 28.32      |             |            |          |           |    |        |       |    |        |           |      |    |    |        |       |
| Viscosity       | of                                       | the    | System                                               | cannot    | be         | computed.   |            |          |           |    |        |       |    |        |           |      |    |    |        |       |
| System          | mass                                     | =      | 99.46                                                | (gm)      | density    | =           | 2.24       | (gm/cc)  |           |    |        |       |    |        |           |      |    |    |        |       |
|                 | G                                        | =      | -1597867.7                                           | (J)       | H          | =           | -1294864.4 | (J)      | S         | =  | 250.7  | (J/K) | V  | =      | 44.44     | (cc) | Cp | =  | 129.71 | (J/K) |
| Oxygen          | delta                                    | moles  | =                                                    | 0.0034025 | delta      | grams       | =          | 0.108876 |           |    |        |       |    |        |           |      |    |    |        |       |
|                 | G                                        | =      | -926.81                                              | (J)       | H          | =           | 102.27     | (J)      | S         | =  | 0.85   | (J/K) | V  | =      | 341.91    | (cc) | Cp | =  | 0.12   | (J/K) |
| *****-----***** |                                          |        |                                                      |           |            |             |            |          |           |    |        |       |    |        |           |      |    |    |        |       |
| Model 828 Bokan |                                          |        |                                                      |           |            |             |            |          |           |    |        |       |    |        |           |      |    |    |        |       |
| Temp (oC)       | =                                        | 930.47 |                                                      |           |            |             |            |          |           |    |        |       |    |        |           |      |    |    |        |       |
| Constraint      | Flags:                                   | fO2    | path                                                 | =         | QFM        | Fractionate | Solids     |          |           |    |        |       |    |        |           |      |    |    |        |       |
| Liquid          | mass                                     | =      | 46.91                                                | (gm)      | density    | =           | 2.27       | (gm/cc)  | viscosity | =  | 4.46   | (log  | 10 | poise) | (analysis | in   | wt | %) |        |       |
|                 | G                                        | =      | -764128.78                                           | (J)       | H          | =           | -611719.22 | (J)      | S         | =  | 126.63 | (J/K) | V  | =      | 20.64     | (cc) | Cp | =  | 65.45  | (J/K) |
|                 | SiO2                                     | =      | TiO2                                                 |           |            |             |            |          |           |    |        |       |    |        |           |      |    |    |        |       |
|                 | 63.04                                    |        | 0.26                                                 |           |            |             |            |          |           |    |        |       |    |        |           |      |    |    |        |       |
|                 |                                          |        | 15.45                                                |           |            |             |            |          |           |    |        |       |    |        |           |      |    |    |        |       |
|                 |                                          |        |                                                      | Fe2O3     |            |             |            |          |           |    |        |       |    |        |           |      |    |    |        |       |
|                 |                                          |        |                                                      | 1         |            |             |            |          |           |    |        |       |    |        |           |      |    |    |        |       |
|                 |                                          |        |                                                      | 0         |            |             |            |          |           |    |        |       |    |        |           |      |    |    |        |       |
|                 |                                          |        |                                                      | 3.9       |            |             |            |          |           |    |        |       |    |        |           |      |    |    |        |       |
|                 |                                          |        |                                                      | 0.47      |            |             |            |          |           |    |        |       |    |        |           |      |    |    |        |       |
|                 |                                          |        |                                                      | 0.85      |            |             |            |          |           |    |        |       |    |        |           |      |    |    |        |       |
|                 |                                          |        |                                                      | 0         |            |             |            |          |           |    |        |       |    |        |           |      |    |    |        |       |
|                 |                                          |        |                                                      | 0         |            |             |            |          |           |    |        |       |    |        |           |      |    |    |        |       |
|                 |                                          |        |                                                      | 3.81      |            |             |            |          |           |    |        |       |    |        |           |      |    |    |        |       |
|                 |                                          |        |                                                      | 4.41      |            |             |            |          |           |    |        |       |    |        |           |      |    |    |        |       |
|                 |                                          |        |                                                      | 2.5       |            |             |            |          |           |    |        |       |    |        |           |      |    |    |        |       |
|                 |                                          |        |                                                      | 0.45      |            |             |            |          |           |    |        |       |    |        |           |      |    |    |        |       |
|                 |                                          |        |                                                      | 3.85      |            |             |            |          |           |    |        |       |    |        |           |      |    |    |        |       |
| opx             | mass                                     | =      | 0.18                                                 | (gm)      | density    | =           | 3.45       | (gm/cc)  | (analysis | in | mole   | %)    |    |        |           |      |    |    |        |       |
|                 | opx                                      | =      | Na0.00Ca0.05Fe"0.79Mg1.10Fe"0.02Ti0.00Al0.10Si1.94O6 |           |            |             |            |          |           |    |        |       |    |        |           |      |    |    |        |       |
|                 | G                                        | =      | -2509.46                                             | (J)       | H          | =           | -2049.59   | (J)      | S         | =  | 0.38   | (J/K) | V  | =      | 0.05      | (cc) | Cp | =  | 0.21   | (J/K) |
|                 | diopside                                 | =      | clinoenstatit                                        |           |            |             |            |          |           |    |        |       |    |        |           |      |    |    |        |       |
|                 | -79.79                                   |        | 94.67                                                |           |            |             |            |          |           |    |        |       |    |        |           |      |    |    |        |       |
|                 |                                          |        | 78.91                                                |           |            |             |            |          |           |    |        |       |    |        |           |      |    |    |        |       |
|                 |                                          |        |                                                      | 3.72      |            |             |            |          |           |    |        |       |    |        |           |      |    |    |        |       |
|                 |                                          |        |                                                      | -3.56     |            |             |            |          |           |    |        |       |    |        |           |      |    |    |        |       |
|                 |                                          |        |                                                      | 5.91      |            |             |            |          |           |    |        |       |    |        |           |      |    |    |        |       |
|                 |                                          |        |                                                      | 0.14      |            |             |            |          |           |    |        |       |    |        |           |      |    |    |        |       |
| feldspar        | mass                                     | =      | 0.93                                                 | (gm)      | density    | =           | 2.64       | (gm/cc)  | (analysis | in | mole   | %)    |    |        |           |      |    |    |        |       |
|                 | K0.01Na0.45Ca0.54Al1.54Si2.46O8          |        |                                                      |           |            |             |            |          |           |    |        |       |    |        |           |      |    |    |        |       |
|                 | G                                        | =      | -15622.25                                            | (J)       | H          | =           | -13104.23  | (J)      | S         | =  | 2.09   | (J/K) | V  | =      | 0.35      | (cc) | Cp | =  | 1.13   | (J/K) |
|                 | albite                                   | =      | anorthite                                            |           |            |             |            |          |           |    |        |       |    |        |           |      |    |    |        |       |
|                 | 44.61                                    |        | 54.13                                                |           |            |             |            |          |           |    |        |       |    |        |           |      |    |    |        |       |
|                 |                                          |        | 1.26                                                 |           |            |             |            |          |           |    |        |       |    |        |           |      |    |    |        |       |
| spinel          | mass                                     | =      | 0.13                                                 | (gm)      | density    | =           | 4.82       | (gm/cc)  | (analysis | in | mole   | %)    |    |        |           |      |    |    |        |       |
|                 | Fe"1.12Mg0.12Fe"1.35Al0.19Cr0.00Ti0.23O4 |        |                                                      |           |            |             |            |          |           |    |        |       |    |        |           |      |    |    |        |       |
|                 | G                                        | =      | -965.71                                              | (J)       | H          | =           | -663.83    | (J)      | S         | =  | 0.25   | (J/K) | V  | =      | 0.03      | (cc) | Cp | =  | 0.12   | (J/K) |
|                 | chromite                                 | =      | hercynite                                            |           |            |             |            |          |           |    |        |       |    |        |           |      |    |    |        |       |
|                 | 0                                        |        | -2.17                                                |           |            |             |            |          |           |    |        |       |    |        |           |      |    |    |        |       |
|                 |                                          |        | 67.34                                                |           |            |             |            |          |           |    |        |       |    |        |           |      |    |    |        |       |
|                 |                                          |        |                                                      | spinel    |            |             |            |          |           |    |        |       |    |        |           |      |    |    |        |       |
|                 |                                          |        |                                                      | 11.66     |            |             |            |          |           |    |        |       |    |        |           |      |    |    |        |       |
|                 |                                          |        |                                                      |           | ulvospinel |             |            |          |           |    |        |       |    |        |           |      |    |    |        |       |
|                 |                                          |        |                                                      |           | 23.17      |             |            |          |           |    |        |       |    |        |           |      |    |    |        |       |
| water           | mass                                     | =      | 1.19                                                 | (gm)      | density    | =           | 0.19       | (gm/cc)  |           |    |        |       |    |        |           |      |    |    |        |       |
|                 | H2O                                      | =      |                                                      |           |            |             |            |          |           |    |        |       |    |        |           |      |    |    |        |       |
|                 | G                                        | =      | -28346.68                                            | (J)       | H          | =           | -14099.32  | (J)      | S         | =  | 11.84  | (J/K) | V  | =      | 6.25      | (cc) | Cp | =  | 3.83   | (J/K) |
| Total           | solids                                   | mass   | =                                                    | 2.43      | (gm)       | density     | =          | 0.36     | (gm/cc)   |    |        |       |    |        |           |      |    |    |        |       |
|                 | G                                        | =      | -47444.1                                             | (J)       | H          | =           | -29916.98  | (J)      | S         | =  | 14.56  | (J/K) | V  | =      | 6.68      | (cc) | Cp | =  | 5.28   | (J/K) |
| Summary         | of                                       | all    | fractionated                                         | phases:   | (total     | mass        | =          | 50.12    | grams)    |    |        |       |    |        |           |      |    |    |        |       |
| opx             | mass                                     | =      | 4.72                                                 | (gm)      | density    | =           | 3.4        | (gm/cc)  | (analysis | in | mole   | %)    |    |        |           |      |    |    |        |       |

|                 |                                           |                                                       |              |              |            |             |             |          |           |     |        |       |      |        |           |      |     |        |       |       |
|-----------------|-------------------------------------------|-------------------------------------------------------|--------------|--------------|------------|-------------|-------------|----------|-----------|-----|--------|-------|------|--------|-----------|------|-----|--------|-------|-------|
|                 | opx                                       | Na0.00Ca0.06Fe"0.67Mg1.20Fe""0.02Ti0.00Al0.10Si1.94O6 |              |              |            |             |             |          |           |     |        |       |      |        |           |      |     |        |       |       |
|                 | G                                         | =                                                     | -67826.55    | (J)          | H          | =           | -55657.45   | (J)      | S         | =   | 10.11  | (J/K) | V    | =      | 1.39      | (cc) | Cp  | =      | 5.57  | (J/K) |
|                 | diopside                                  | clinoenstatit                                         | hedenbergite | alumno-buffo | buffonite  | essenite    | jadeite     |          |           |     |        |       |      |        |           |      |     |        |       |       |
|                 | -66.72                                    | 93.48                                                 | 66.64        | 4.09         | -3.79      | 6.18        | 0.13        |          |           |     |        |       |      |        |           |      |     |        |       |       |
| cpx             | mass                                      | =                                                     | 7.44         | (gm)         | density    | =           | 3.31        | (gm/cc)  | (analysis | in  | mole   | %)    |      |        |           |      |     |        |       |       |
|                 | cpx                                       | Na0.01Ca0.83Fe"0.24Mg0.75Fe""0.06Ti0.03Al0.24Si1.83O6 |              |              |            |             |             |          |           |     |        |       |      |        |           |      |     |        |       |       |
|                 | G                                         | =                                                     | -113914.84   | (J)          | H          | =           | -95050.39   | (J)      | S         | =   | 15.67  | (J/K) | V    | =      | 2.25      | (cc) | Cp  | =      | 8.51  | (J/K) |
|                 | diopside                                  | clinoenstatit                                         | hedenbergite | alumno-buffo | buffonite  | essenite    | jadeite     |          |           |     |        |       |      |        |           |      |     |        |       |       |
|                 | 41.95                                     | 15.49                                                 | 24.27        | 10.61        | -5.51      | 11.75       | 1.43        |          |           |     |        |       |      |        |           |      |     |        |       |       |
| feldspar        | mass                                      | =                                                     | 34.32        | (gm)         | density    | =           | 2.68        | (gm/cc)  | (analysis | in  | mole   | %)    |      |        |           |      |     |        |       |       |
|                 | K0.01Na0.25Ca0.74Al1.74Si2.26O8           |                                                       |              |              |            |             |             |          |           |     |        |       |      |        |           |      |     |        |       |       |
|                 | G                                         | =                                                     | -574732      | (J)          | H          | =           | -483538.13  | (J)      | S         | =   | 75.77  | (J/K) | V    | =      | 12.81     | (cc) | Cp  | =      | 41.24 | (J/K) |
|                 | albite                                    | anorthite                                             | sanidine     |              |            |             |             |          |           |     |        |       |      |        |           |      |     |        |       |       |
|                 | 25.2                                      | 74.23                                                 | 0.57         |              |            |             |             |          |           |     |        |       |      |        |           |      |     |        |       |       |
| spinel          | mass                                      | =                                                     | 3.65         | (gm)         | density    | =           | 4.75        | (gm/cc)  | (analysis | in  | mole   | %)    |      |        |           |      |     |        |       |       |
|                 | Fe"1.11Mg0.18Fe""1.20Al0.23Cr0.00Ti0.28O4 |                                                       |              |              |            |             |             |          |           |     |        |       |      |        |           |      |     |        |       |       |
|                 | G                                         | =                                                     | -28635.4     | (J)          | H          | =           | -20015.86   | (J)      | S         | =   | 7.16   | (J/K) | V    | =      | 0.77      | (cc) | Cp  | =      | 3.34  | (J/K) |
|                 | chromite                                  | hercynite                                             | magnetite    | spinel       | ulvospinel |             |             |          |           |     |        |       |      |        |           |      |     |        |       |       |
|                 | 0                                         | -5.87                                                 | 60.14        | 17.58        | 28.15      |             |             |          |           |     |        |       |      |        |           |      |     |        |       |       |
| Viscosity       | of                                        | the                                                   | System       | cannot       | be         | computed.   |             |          |           |     |        |       |      |        |           |      |     |        |       |       |
| System          | mass                                      | =                                                     | 99.46        | (gm)         | density    | =           | 2.23        | (gm/cc)  |           |     |        |       |      |        |           |      |     |        |       |       |
|                 | G                                         | =                                                     | -1596681.67  | (J)          | H          | =           | -1295898.03 | (J)      | S         | =   | 249.9  | (J/K) | V    | =      | 44.54     | (cc) | Cp  | =      | 129.4 | (J/K) |
| Oxygen          | delta                                     | moles                                                 | =            | 0.00351881   | delta      | grams       | =           | 0.112598 |           |     |        |       |      |        |           |      |     |        |       |       |
|                 | G                                         | =                                                     | -954.09      | (J)          | H          | =           | 105.14      | (J)      | S         | =   | 0.88   | (J/K) | V    | =      | 352.14    | (cc) | Cp  | =      | 0.13  | (J/K) |
| *****           |                                           |                                                       |              |              |            |             |             |          |           |     |        |       |      |        |           |      |     |        |       |       |
| Model 828 Bokan |                                           |                                                       |              |              |            |             |             |          |           |     |        |       |      |        |           |      |     |        |       |       |
| Temp (oC)       | =                                         | 925.47                                                |              |              |            |             |             |          |           |     |        |       |      |        |           |      |     |        |       |       |
| Constraint      | Flags:                                    | fO2                                                   | path         | =            | QFM        | Fractionate | Solids      |          |           |     |        |       |      |        |           |      |     |        |       |       |
| Liquid          | mass                                      | =                                                     | 45.69        | (gm)         | density    | =           | 2.27        | (gm/cc)  | viscosity | =   | 4.53   | (log  | 10   | poise) | (analysis | in   | wt  | %)     |       |       |
|                 | G                                         | =                                                     | -744382.21   | (J)          | H          | =           | -596853.57  | (J)      | S         | =   | 123.08 | (J/K) | V    | =      | 20.14     | (cc) | Cp  | =      | 63.65 | (J/K) |
|                 | SiO2                                      | TiO2                                                  | Al2O3        | Fe2O3        | Cr2O3      | FeO         | MnO         | MgO      | NiO       | CoO | CaO    | Na2O  | K2O  | P2O5   | H2O       | CO2  | SO3 | Cl2O-1 | F2O-1 |       |
|                 | 63.46                                     | 0.24                                                  | 15.28        | 0.98         | 0          | 3.75        | 0.48        | 0.8      | 0         | 0   | 3.7    | 4.43  | 2.57 | 0.46   | 3.86      | 0    | 0   | 0      | 0     |       |
| opx             | mass                                      | =                                                     | 0.17         | (gm)         | density    | =           | 3.46        | (gm/cc)  | (analysis | in  | mole   | %)    |      |        |           |      |     |        |       |       |
|                 | opx                                       | Na0.00Ca0.05Fe"0.80Mg1.08Fe""0.02Ti0.00Al0.10Si1.94O6 |              |              |            |             |             |          |           |     |        |       |      |        |           |      |     |        |       |       |
|                 | G                                         | =                                                     | -2303.77     | (J)          | H          | =           | -1882.9     | (J)      | S         | =   | 0.35   | (J/K) | V    | =      | 0.05      | (cc) | Cp  | =      | 0.19  | (J/K) |
|                 | diopside                                  | clinoenstatit                                         | hedenbergite | alumno-buffo | buffonite  | essenite    | jadeite     |          |           |     |        |       |      |        |           |      |     |        |       |       |
|                 | -81.44                                    | 94.85                                                 | 80.41        | 3.69         | -3.54      | 5.89        | 0.14        |          |           |     |        |       |      |        |           |      |     |        |       |       |
| feldspar        | mass                                      | =                                                     | 0.9          | (gm)         | density    | =           | 2.64        | (gm/cc)  | (analysis | in  | mole   | %)    |      |        |           |      |     |        |       |       |
|                 | K0.01Na0.46Ca0.52Al1.52Si2.48O8           |                                                       |              |              |            |             |             |          |           |     |        |       |      |        |           |      |     |        |       |       |
|                 | G                                         | =                                                     | -15021.98    | (J)          | H          | =           | -12611.64   | (J)      | S         | =   | 2.01   | (J/K) | V    | =      | 0.34      | (cc) | Cp  | =      | 1.09  | (J/K) |
|                 | albite                                    | anorthite                                             | sanidine     |              |            |             |             |          |           |     |        |       |      |        |           |      |     |        |       |       |
|                 | 46.18                                     | 52.48                                                 | 1.34         |              |            |             |             |          |           |     |        |       |      |        |           |      |     |        |       |       |
| spinel          | mass                                      | =                                                     | 0.12         | (gm)         | density    | =           | 4.83        | (gm/cc)  | (analysis | in  | mole   | %)    |      |        |           |      |     |        |       |       |
|                 | Fe"1.11Mg0.11Fe""1.36Al0.19Cr0.00Ti0.23O4 |                                                       |              |              |            |             |             |          |           |     |        |       |      |        |           |      |     |        |       |       |
|                 | G                                         | =                                                     | -895.14      | (J)          | H          | =           | -615.75     | (J)      | S         | =   | 0.23   | (J/K) | V    | =      | 0.02      | (cc) | Cp  | =      | 0.11  | (J/K) |
|                 | chromite                                  | hercynite                                             | magnetite    | spinel       | ulvospinel |             |             |          |           |     |        |       |      |        |           |      |     |        |       |       |
|                 | 0                                         | -1.89                                                 | 68.04        | 11.2         | 22.65      |             |             |          |           |     |        |       |      |        |           |      |     |        |       |       |
| water           | mass                                      | =                                                     | 1.24         | (gm)         | density    | =           | 0.19        | (gm/cc)  |           |     |        |       |      |        |           |      |     |        |       |       |



|                 |                                           |        |              |               |            |             |             |          |           |     |        |       |      |        |           |      |        |       |        |       |
|-----------------|-------------------------------------------|--------|--------------|---------------|------------|-------------|-------------|----------|-----------|-----|--------|-------|------|--------|-----------|------|--------|-------|--------|-------|
|                 | 47.73                                     | 50.84  | 1.43         |               |            |             |             |          |           |     |        |       |      |        |           |      |        |       |        |       |
| spinel          | mass                                      | =      | 0.11         | (gm)          | density    | =           | 4.83        | (gm/cc)  | (analysis | in  | mole   | %)    |      |        |           |      |        |       |        |       |
|                 | Fe"1.11Mg0.11Fe""1.37Al0.18Cr0.00Ti0.22O4 |        |              |               |            |             |             |          |           |     |        |       |      |        |           |      |        |       |        |       |
|                 | G                                         | =      | -830.68      | (J)           | H          | =           | -571.82     | (J)      | S         | =   | 0.22   | (J/K) | V    | =      | 0.02      | (cc) | Cp     | =     | 0.1    | (J/K) |
|                 | chromite                                  | =      | hercynite    | spinel        | ulvospinel |             |             |          |           |     |        |       |      |        |           |      |        |       |        |       |
|                 | 0                                         | -1.64  | 68.74        | 10.76         | 22.14      |             |             |          |           |     |        |       |      |        |           |      |        |       |        |       |
| water           | mass                                      | =      | 1.28         | (gm)          | density    | =           | 0.19        | (gm/cc)  |           |     |        |       |      |        |           |      |        |       |        |       |
|                 | H2O                                       |        |              |               |            |             |             |          |           |     |        |       |      |        |           |      |        |       |        |       |
|                 | G                                         | =      | -30281.02    | (J)           | H          | =           | -15165.69   | (J)      | S         | =   | 12.66  | (J/K) | V    | =      | 6.62      | (cc) | Cp     | =     | 4.13   | (J/K) |
| Total           | solids                                    | mass   | =            | 2.41          | (gm)       | density     | =           | 0.34     | (gm/cc)   |     |        |       |      |        |           |      |        |       |        |       |
|                 | G                                         | =      | -47695.15    | (J)           | H          | =           | -29624.77   | (J)      | S         | =   | 15.14  | (J/K) | V    | =      | 7.02      | (cc) | Cp     | =     | 5.46   | (J/K) |
| Summary         | of                                        | all    | fractionated | phases:       | (total     | mass        | =           | 52.53    | grams)    |     |        |       |      |        |           |      |        |       |        |       |
| opx             | mass                                      | =      | 5.06         | (gm)          | density    | =           | 3.41        | (gm/cc)  | (analysis | in  | mole   | %)    |      |        |           |      |        |       |        |       |
|                 | opx                                       |        |              |               |            |             |             |          |           |     |        |       |      |        |           |      |        |       |        |       |
|                 | G                                         | =      | -72470.18    | (J)           | H          | =           | -59596.78   | (J)      | S         | =   | 10.79  | (J/K) | V    | =      | 1.48      | (cc) | Cp     | =     | 5.96   | (J/K) |
|                 | diopside                                  | =      | hedenbergite | alumino-buffo | buffonite  | essenite    | jadeite     |          |           |     |        |       |      |        |           |      |        |       |        |       |
|                 | -67.64                                    | 93.56  | 67.5         | 4.06          | -3.78      | 6.16        | 0.13        |          |           |     |        |       |      |        |           |      |        |       |        |       |
| cpx             | mass                                      | =      | 7.44         | (gm)          | density    | =           | 3.31        | (gm/cc)  | (analysis | in  | mole   | %)    |      |        |           |      |        |       |        |       |
|                 | cpx                                       |        |              |               |            |             |             |          |           |     |        |       |      |        |           |      |        |       |        |       |
|                 | G                                         | =      | -113758.46   | (J)           | H          | =           | -95135.44   | (J)      | S         | =   | 15.6   | (J/K) | V    | =      | 2.25      | (cc) | Cp     | =     | 8.5    | (J/K) |
|                 | diopside                                  | =      | hedenbergite | alumino-buffo | buffonite  | essenite    | jadeite     |          |           |     |        |       |      |        |           |      |        |       |        |       |
|                 | 41.95                                     | 15.49  | 24.27        | 10.61         | -5.51      | 11.75       | 1.43        |          |           |     |        |       |      |        |           |      |        |       |        |       |
| feldspar        | mass                                      | =      | 36.14        | (gm)          | density    | =           | 2.68        | (gm/cc)  | (analysis | in  | mole   | %)    |      |        |           |      |        |       |        |       |
|                 | K0.01Na0.26Ca0.73Al1.73Si2.27O8           |        |              |               |            |             |             |          |           |     |        |       |      |        |           |      |        |       |        |       |
|                 | G                                         | =      | -604502.77   | (J)           | H          | =           | -509604.43  | (J)      | S         | =   | 79.5   | (J/K) | V    | =      | 13.5      | (cc) | Cp     | =     | 43.39  | (J/K) |
|                 | albite                                    | =      | sanidine     |               |            |             |             |          |           |     |        |       |      |        |           |      |        |       |        |       |
|                 | 26.23                                     | 73.16  | 0.61         |               |            |             |             |          |           |     |        |       |      |        |           |      |        |       |        |       |
| spinel          | mass                                      | =      | 3.89         | (gm)          | density    | =           | 4.76        | (gm/cc)  | (analysis | in  | mole   | %)    |      |        |           |      |        |       |        |       |
|                 | Fe"1.11Mg0.17Fe""1.21Al0.23Cr0.00Ti0.28O4 |        |              |               |            |             |             |          |           |     |        |       |      |        |           |      |        |       |        |       |
|                 | G                                         | =      | -30388.5     | (J)           | H          | =           | -21307.8    | (J)      | S         | =   | 7.61   | (J/K) | V    | =      | 0.82      | (cc) | Cp     | =     | 3.56   | (J/K) |
|                 | chromite                                  | =      | hercynite    | spinel        | ulvospinel |             |             |          |           |     |        |       |      |        |           |      |        |       |        |       |
|                 | 0                                         | -5.63  | 60.61        | 17.2          | 27.83      |             |             |          |           |     |        |       |      |        |           |      |        |       |        |       |
| Viscosity       | of                                        | the    | System       | cannot        | be         | computed.   |             |          |           |     |        |       |      |        |           |      |        |       |        |       |
| System          | mass                                      | =      | 99.47        | (gm)          | density    | =           | 2.22        | (gm/cc)  |           |     |        |       |      |        |           |      |        |       |        |       |
|                 | G                                         | =      | -1594309.69  | (J)           | H          | =           | -1297896.73 | (J)      | S         | =   | 248.33 | (J/K) | V    | =      | 44.72     | (cc) | Cp     | =     | 128.81 | (J/K) |
|                 |                                           |        |              |               |            |             |             |          |           |     |        |       |      |        |           |      |        |       |        |       |
| Oxygen          | delta                                     | moles  | =            | 0.00372935    | delta      | grams       | =           | 0.119335 |           |     |        |       |      |        |           |      |        |       |        |       |
|                 | G                                         | =      | -1001.85     | (J)           | H          | =           | 110.1       | (J)      | S         | =   | 0.93   | (J/K) | V    | =      | 370.11    | (cc) | Cp     | =     | 0.13   | (J/K) |
| *****_*****     |                                           |        |              |               |            |             |             |          |           |     |        |       |      |        |           |      |        |       |        |       |
| Model 828 Bokan |                                           |        |              |               |            |             |             |          |           |     |        |       |      |        |           |      |        |       |        |       |
| Temp (oC)       | =                                         | 915.47 |              |               |            |             |             |          |           |     |        |       |      |        |           |      |        |       |        |       |
| Constraint      | Flags:                                    | fO2    | path         | =             | QFM        | Fractionate | Solids      |          |           |     |        |       |      |        |           |      |        |       |        |       |
| Liquid          | mass                                      | =      | 43.41        | (gm)          | density    | =           | 2.26        | (gm/cc)  | viscosity | =   | 4.67   | (log  | 10   | poise) | (analysis | in   | wt     | %)    |        |       |
|                 | G                                         | =      | -707402.13   | (J)           | H          | =           | -568992.87  | (J)      | S         | =   | 116.45 | (J/K) | V    | =      | 19.18     | (cc) | Cp     | =     | 60.29  | (J/K) |
|                 | SiO2                                      | TiO2   | Al2O3        | Fe2O3         | Cr2O3      | FeO         | MnO         | MgO      | NiO       | CoO | Na2O   | K2O   | P2O5 | H2O    | CO2       | SO3  | Cl2O-1 | F2O-1 |        |       |
|                 | 64.28                                     | 0.22   | 14.94        | 0.92          | 0          | 3.47        | 0.51        | 0.71     | 0         | 0   | 3.48   | 4.44  | 2.69 | 0.48   | 3.87      | 0    | 0      | 0     | 0      |       |
| opx             | mass                                      | =      | 0.14         | (gm)          | density    | =           | 3.47        | (gm/cc)  | (analysis | in  | mole   | %)    |      |        |           |      |        |       |        |       |



|           |                                           |                                                       |              |               |            |           |             |          |           |    |        |       |   |   |        |      |    |   |        |       |
|-----------|-------------------------------------------|-------------------------------------------------------|--------------|---------------|------------|-----------|-------------|----------|-----------|----|--------|-------|---|---|--------|------|----|---|--------|-------|
|           | opx                                       | Na0.00Ca0.05Fe"0.83Mg1.06Fe""0.02Ti0.00Al0.10Si1.94O6 |              |               |            |           |             |          |           |    |        |       |   |   |        |      |    |   |        |       |
|           | G                                         | =                                                     | -1951.48     | (J)           | H          | =         | -1597.2     | (J)      | S         | =  | 0.3    | (J/K) | V | = | 0.04   | (cc) | Cp | = | 0.16   | (J/K) |
|           | diopside                                  | clinoenstatit                                         | hedenbergite | alumino-buffo | buffonite  | essenite  | jadeite     |          |           |    |        |       |   |   |        |      |    |   |        |       |
|           | -84.76                                    | 95.2                                                  | 83.44        | 3.63          | -3.51      | 5.86      | 0.14        |          |           |    |        |       |   |   |        |      |    |   |        |       |
| feldspar  | mass                                      | =                                                     | 0.83         | (gm)          | density    | =         | 2.63        | (gm/cc)  | (analysis | in | mole   | %)    |   |   |        |      |    |   |        |       |
|           | K0.02Na0.49Ca0.49Al1.49Si2.51O8           |                                                       |              |               |            |           |             |          |           |    |        |       |   |   |        |      |    |   |        |       |
|           | G                                         | =                                                     | -13945.06    | (J)           | H          | =         | -11727.98   | (J)      | S         | =  | 1.87   | (J/K) | V | = | 0.32   | (cc) | Cp | = | 1.01   | (J/K) |
|           | albite                                    | anorthite                                             | sanidine     |               |            |           |             |          |           |    |        |       |   |   |        |      |    |   |        |       |
|           | 49.25                                     | 49.22                                                 | 1.53         |               |            |           |             |          |           |    |        |       |   |   |        |      |    |   |        |       |
| spinel    | mass                                      | =                                                     | 0.1          | (gm)          | density    | =         | 4.84        | (gm/cc)  | (analysis | in | mole   | %)    |   |   |        |      |    |   |        |       |
|           | Fe"1.11Mg0.10Fe""1.39Al0.18Cr0.00Ti0.22O4 |                                                       |              |               |            |           |             |          |           |    |        |       |   |   |        |      |    |   |        |       |
|           | G                                         | =                                                     | -771.6       | (J)           | H          | =         | -531.58     | (J)      | S         | =  | 0.2    | (J/K) | V | = | 0.02   | (cc) | Cp | = | 0.1    | (J/K) |
|           | chromite                                  | hercynite                                             | magnetite    | spinel        | ulvospinel |           |             |          |           |    |        |       |   |   |        |      |    |   |        |       |
|           | 0                                         | -1.4                                                  | 69.42        | 10.34         | 21.64      |           |             |          |           |    |        |       |   |   |        |      |    |   |        |       |
| water     | mass                                      | =                                                     | 1.32         | (gm)          | density    | =         | 0.19        | (gm/cc)  |           |    |        |       |   |   |        |      |    |   |        |       |
|           | H2O                                       |                                                       |              |               |            |           |             |          |           |    |        |       |   |   |        |      |    |   |        |       |
|           | G                                         | =                                                     | -31189.78    | (J)           | H          | =         | -15674.88   | (J)      | S         | =  | 13.05  | (J/K) | V | = | 6.79   | (cc) | Cp | = | 4.27   | (J/K) |
| Total     | solids                                    | mass                                                  | =            | 2.4           | (gm)       | density   | =           | 0.33     | (gm/cc)   |    |        |       |   |   |        |      |    |   |        |       |
|           | G                                         | =                                                     | -47857.93    | (J)           | H          | =         | -29531.64   | (J)      | S         | =  | 15.42  | (J/K) | V | = | 7.17   | (cc) | Cp | = | 5.54   | (J/K) |
| Summary   | of                                        | all                                                   | fractionated | phases:       | (total     | mass      | =           | 53.66    | grams)    |    |        |       |   |   |        |      |    |   |        |       |
| opx       | mass                                      | =                                                     | 5.21         | (gm)          | density    | =         | 3.41        | (gm/cc)  | (analysis | in | mole   | %)    |   |   |        |      |    |   |        |       |
|           | opx                                       | Na0.00Ca0.06Fe"0.68Mg1.19Fe""0.02Ti0.00Al0.10Si1.94O6 |              |               |            |           |             |          |           |    |        |       |   |   |        |      |    |   |        |       |
|           | G                                         | =                                                     | -74501.85    | (J)           | H          | =         | -61334.37   | (J)      | S         | =  | 11.08  | (J/K) | V | = | 1.53   | (cc) | Cp | = | 6.13   | (J/K) |
|           | diopside                                  | clinoenstatit                                         | hedenbergite | alumino-buffo | buffonite  | essenite  | jadeite     |          |           |    |        |       |   |   |        |      |    |   |        |       |
|           | -68.08                                    | 93.6                                                  | 67.91        | 4.05          | -3.77      | 6.15      | 0.13        |          |           |    |        |       |   |   |        |      |    |   |        |       |
| cpx       | mass                                      | =                                                     | 7.44         | (gm)          | density    | =         | 3.31        | (gm/cc)  | (analysis | in | mole   | %)    |   |   |        |      |    |   |        |       |
|           | cpx                                       | Na0.01Ca0.83Fe"0.24Mg0.75Fe""0.06Ti0.03Al0.24Si1.83O6 |              |               |            |           |             |          |           |    |        |       |   |   |        |      |    |   |        |       |
|           | G                                         | =                                                     | -113680.54   | (J)           | H          | =         | -95177.94   | (J)      | S         | =  | 15.57  | (J/K) | V | = | 2.25   | (cc) | Cp | = | 8.5    | (J/K) |
|           | diopside                                  | clinoenstatit                                         | hedenbergite | alumino-buffo | buffonite  | essenite  | jadeite     |          |           |    |        |       |   |   |        |      |    |   |        |       |
|           | 41.95                                     | 15.49                                                 | 24.27        | 10.61         | -5.51      | 11.75     | 1.43        |          |           |    |        |       |   |   |        |      |    |   |        |       |
| feldspar  | mass                                      | =                                                     | 37.01        | (gm)          | density    | =         | 2.68        | (gm/cc)  | (analysis | in | mole   | %)    |   |   |        |      |    |   |        |       |
|           | K0.01Na0.27Ca0.73Al1.73Si2.27O8           |                                                       |              |               |            |           |             |          |           |    |        |       |   |   |        |      |    |   |        |       |
|           | G                                         | =                                                     | -618517.87   | (J)           | H          | =         | -521941.81  | (J)      | S         | =  | 81.25  | (J/K) | V | = | 13.82  | (cc) | Cp | = | 44.41  | (J/K) |
|           | albite                                    | anorthite                                             | sanidine     |               |            |           |             |          |           |    |        |       |   |   |        |      |    |   |        |       |
|           | 26.74                                     | 72.64                                                 | 0.62         |               |            |           |             |          |           |    |        |       |   |   |        |      |    |   |        |       |
| spinel    | mass                                      | =                                                     | 4            | (gm)          | density    | =         | 4.76        | (gm/cc)  | (analysis | in | mole   | %)    |   |   |        |      |    |   |        |       |
|           | Fe"1.11Mg0.17Fe""1.22Al0.23Cr0.00Ti0.28O4 |                                                       |              |               |            |           |             |          |           |    |        |       |   |   |        |      |    |   |        |       |
|           | G                                         | =                                                     | -31163.89    | (J)           | H          | =         | -21886.63   | (J)      | S         | =  | 7.81   | (J/K) | V | = | 0.84   | (cc) | Cp | = | 3.66   | (J/K) |
|           | chromite                                  | hercynite                                             | magnetite    | spinel        | ulvospinel |           |             |          |           |    |        |       |   |   |        |      |    |   |        |       |
|           | 0                                         | -5.52                                                 | 60.83        | 17.02         | 27.67      |           |             |          |           |    |        |       |   |   |        |      |    |   |        |       |
| Viscosity | of                                        | the                                                   | System       | cannot        | be         | computed. |             |          |           |    |        |       |   |   |        |      |    |   |        |       |
| System    | mass                                      | =                                                     | 99.47        | (gm)          | density    | =         | 2.22        | (gm/cc)  |           |    |        |       |   |   |        |      |    |   |        |       |
|           | G                                         | =                                                     | -1593124.2   | (J)           | H          | =         | -1298865.24 | (J)      | S         | =  | 247.56 | (J/K) | V | = | 44.79  | (cc) | Cp | = | 128.54 | (J/K) |
| Oxygen    | delta                                     | moles                                                 | =            | 0.00382461    | delta      | grams     | =           | 0.122383 |           |    |        |       |   |   |        |      |    |   |        |       |
|           | G                                         | =                                                     | -1022.67     | (J)           | H          | =         | 112.23      | (J)      | S         | =  | 0.95   | (J/K) | V | = | 377.97 | (cc) | Cp | = | 0.14   | (J/K) |

\*\*\*\*\*-----\*\*\*\*\*

Model 828 Bokan

Temp (oC) = 910.47

|            |                                         |                                                    |              |              |            |             |            |         |           |     |        |       |      |        |           |      |     |        |       |       |
|------------|-----------------------------------------|----------------------------------------------------|--------------|--------------|------------|-------------|------------|---------|-----------|-----|--------|-------|------|--------|-----------|------|-----|--------|-------|-------|
| Constraint | Flags:                                  | fO2                                                | path         | =            | QFM        | Fractionate | Solids     |         |           |     |        |       |      |        |           |      |     |        |       |       |
| Liquid     | mass                                    | =                                                  | 42.35        | (gm)         | density    | =           | 2.26       | (gm/cc) | viscosity | =   | 4.73   | (log  | 10   | poise) | (analysis | in   | wt  | (%)    |       |       |
|            | G                                       | =                                                  | -690048.79   | (J)          | H          | =           | -555907.6  | (J)     | S         | =   | 113.33 | (J/K) | V    | =      | 18.74     | (cc) | Cp  | =      | 58.72 | (J/K) |
|            | SiO2                                    | TiO2                                               | Al2O3        | Fe2O3        | Cr2O3      | FeO         | MnO        | MgO     | NiO       | CoO | CaO    | Na2O  | K2O  | P2O5   | H2O       | CO2  | SO3 | Cl2O-1 | F2O-1 |       |
|            | 64.67                                   | 0.21                                               | 14.77        | 0.9          | 0          | 3.33        | 0.52       | 0.67    | 0         | 0   | 3.38   | 4.44  | 2.75 | 0.5    | 3.87      | 0    | 0   | 0      | 0     |       |
| opx        | mass                                    | =                                                  | 0.13         | (gm)         | density    | =           | 3.48       | (gm/cc) | (analysis | in  | mole   | (%)   |      |        |           |      |     |        |       |       |
|            | opx                                     | Na0.00Ca0.04Fe0.85Mg1.04Fe0.02Ti0.00Al0.10Si1.94O6 |              |              |            |             |            |         |           |     |        |       |      |        |           |      |     |        |       |       |
|            | G                                       | =                                                  | -1800.21     | (J)          | H          | =           | -1474.43   | (J)     | S         | =   | 0.28   | (J/K) | V    | =      | 0.04      | (cc) | Cp  | =      | 0.15  | (J/K) |
|            | diopside                                | clinoenstatit                                      | hedenbergite | alumno-buffo | buffonite  | essenite    | jadeite    |         |           |     |        |       |      |        |           |      |     |        |       |       |
|            | -86.43                                  | 95.37                                              | 84.96        | 3.61         | -3.49      | 5.84        | 0.14       |         |           |     |        |       |      |        |           |      |     |        |       |       |
| feldspar   | mass                                    | =                                                  | 0.81         | (gm)         | density    | =           | 2.63       | (gm/cc) | (analysis | in  | mole   | (%)   |      |        |           |      |     |        |       |       |
|            | K0.02Na0.51Ca0.48Al1.48Si2.52O8         |                                                    |              |              |            |             |            |         |           |     |        |       |      |        |           |      |     |        |       |       |
|            | G                                       | =                                                  | -13457.8     | (J)          | H          | =           | -11328.16  | (J)     | S         | =   | 1.8    | (J/K) | V    | =      | 0.31      | (cc) | Cp  | =      | 0.98  | (J/K) |
|            | albite                                  | anorthite                                          | sanidine     |              |            |             |            |         |           |     |        |       |      |        |           |      |     |        |       |       |
|            | 50.75                                   | 47.63                                              | 1.63         |              |            |             |            |         |           |     |        |       |      |        |           |      |     |        |       |       |
| spinel     | mass                                    | =                                                  | 0.1          | (gm)         | density    | =           | 4.85       | (gm/cc) | (analysis | in  | mole   | (%)   |      |        |           |      |     |        |       |       |
|            | Fe0.11Mg0.10Fe0.14OAl0.18Cr0.00Ti0.21O4 |                                                    |              |              |            |             |            |         |           |     |        |       |      |        |           |      |     |        |       |       |
|            | G                                       | =                                                  | -717.33      | (J)          | H          | =           | -494.61    | (J)     | S         | =   | 0.19   | (J/K) | V    | =      | 0.02      | (cc) | Cp  | =      | 0.09  | (J/K) |
|            | chromite                                | hercynite                                          | magnetite    | spinel       | ulvospinel |             |            |         |           |     |        |       |      |        |           |      |     |        |       |       |
|            | 0                                       | -1.17                                              | 70.08        | 9.94         | 21.14      |             |            |         |           |     |        |       |      |        |           |      |     |        |       |       |
| water      | mass                                    | =                                                  | 1.36         | (gm)         | density    | =           | 0.2        | (gm/cc) |           |     |        |       |      |        |           |      |     |        |       |       |
|            | H2O                                     |                                                    |              |              |            |             |            |         |           |     |        |       |      |        |           |      |     |        |       |       |
|            | G                                       | =                                                  | -32062.88    | (J)          | H          | =           | -16169.48  | (J)     | S         | =   | 13.43  | (J/K) | V    | =      | 6.95      | (cc) | Cp  | =      | 4.42  | (J/K) |
| Total      | solids                                  | mass                                               | =            | 2.4          | (gm)       | density     | =          | 0.33    | (gm/cc)   |     |        |       |      |        |           |      |     |        |       |       |
|            | G                                       | =                                                  | -48038.22    | (J)          | H          | =           | -29466.67  | (J)     | S         | =   | 15.69  | (J/K) | V    | =      | 7.31      | (cc) | Cp  | =      | 5.63  | (J/K) |
| Summary    | of                                      | all                                                | fractionated | phases:      | (total     | mass        | =          | 54.73   | grams)    |     |        |       |      |        |           |      |     |        |       |       |
| opx        | mass                                    | =                                                  | 5.35         | (gm)         | density    | =           | 3.41       | (gm/cc) | (analysis | in  | mole   | (%)   |      |        |           |      |     |        |       |       |
|            | opx                                     | Na0.00Ca0.06Fe0.68Mg1.19Fe0.02Ti0.00Al0.10Si1.94O6 |              |              |            |             |            |         |           |     |        |       |      |        |           |      |     |        |       |       |
|            | G                                       | =                                                  | -76365.13    | (J)          | H          | =           | -62937.21  | (J)     | S         | =   | 11.34  | (J/K) | V    | =      | 1.57      | (cc) | Cp  | =      | 6.29  | (J/K) |
|            | diopside                                | clinoenstatit                                      | hedenbergite | alumno-buffo | buffonite  | essenite    | jadeite    |         |           |     |        |       |      |        |           |      |     |        |       |       |
|            | -68.5                                   | 93.65                                              | 68.3         | 4.04         | -3.76      | 6.14        | 0.13       |         |           |     |        |       |      |        |           |      |     |        |       |       |
| cpx        | mass                                    | =                                                  | 7.44         | (gm)         | density    | =           | 3.31       | (gm/cc) | (analysis | in  | mole   | (%)   |      |        |           |      |     |        |       |       |
|            | cpx                                     | Na0.01Ca0.83Fe0.24Mg0.75Fe0.06Ti0.03Al0.24Si1.83O6 |              |              |            |             |            |         |           |     |        |       |      |        |           |      |     |        |       |       |
|            | G                                       | =                                                  | -113602.8    | (J)          | H          | =           | -95220.41  | (J)     | S         | =   | 15.53  | (J/K) | V    | =      | 2.25      | (cc) | Cp  | =      | 8.49  | (J/K) |
|            | diopside                                | clinoenstatit                                      | hedenbergite | alumno-buffo | buffonite  | essenite    | jadeite    |         |           |     |        |       |      |        |           |      |     |        |       |       |
|            | 41.95                                   | 15.49                                              | 24.27        | 10.61        | -5.51      | 11.75       | 1.43       |         |           |     |        |       |      |        |           |      |     |        |       |       |
| feldspar   | mass                                    | =                                                  | 37.84        | (gm)         | density    | =           | 2.68       | (gm/cc) | (analysis | in  | mole   | (%)   |      |        |           |      |     |        |       |       |
|            | K0.01Na0.27Ca0.72Al1.72Si2.28O8         |                                                    |              |              |            |             |            |         |           |     |        |       |      |        |           |      |     |        |       |       |
|            | G                                       | =                                                  | -632005      | (J)          | H          | =           | -533857.57 | (J)     | S         | =   | 82.92  | (J/K) | V    | =      | 14.14     | (cc) | Cp  | =      | 45.39 | (J/K) |
|            | albite                                  | anorthite                                          | sanidine     |              |            |             |            |         |           |     |        |       |      |        |           |      |     |        |       |       |
|            | 27.24                                   | 72.12                                              | 0.64         |              |            |             |            |         |           |     |        |       |      |        |           |      |     |        |       |       |
| spinel     | mass                                    | =                                                  | 4.1          | (gm)         | density    | =           | 4.76       | (gm/cc) | (analysis | in  | mole   | (%)   |      |        |           |      |     |        |       |       |
|            | Fe0.11Mg0.17Fe0.122Al0.23Cr0.00Ti0.28O4 |                                                    |              |              |            |             |            |         |           |     |        |       |      |        |           |      |     |        |       |       |
|            | G                                       | =                                                  | -31879.37    | (J)          | H          | =           | -22425.7   | (J)     | S         | =   | 7.99   | (J/K) | V    | =      | 0.86      | (cc) | Cp  | =      | 3.75  | (J/K) |
|            | chromite                                | hercynite                                          | magnetite    | spinel       | ulvospinel |             |            |         |           |     |        |       |      |        |           |      |     |        |       |       |
|            | 0                                       | -5.42                                              | 61.04        | 16.86        | 27.53      |             |            |         |           |     |        |       |      |        |           |      |     |        |       |       |
| Viscosity  | of                                      | the                                                | System       | cannot       | be         | computed.   |            |         |           |     |        |       |      |        |           |      |     |        |       |       |
| System     | mass                                    | =                                                  | 99.47        | (gm)         | density    | =           | 2.22       | (gm/cc) |           |     |        |       |      |        |           |      |     |        |       |       |

|                 |                                              |                           |                                             |                                         |                     |                   |                    |                 |                |          |               |               |         |      |            |                  |                   |                 |              |                |       |
|-----------------|----------------------------------------------|---------------------------|---------------------------------------------|-----------------------------------------|---------------------|-------------------|--------------------|-----------------|----------------|----------|---------------|---------------|---------|------|------------|------------------|-------------------|-----------------|--------------|----------------|-------|
|                 | G                                            | =                         | -1591939.3                                  | (J)                                     | H                   | =                 | -1299815.16        | (J)             | S              | =        | 246.81        | (J/K)         | V       | =    | 44.87      | (cc)             | Cp                | =               | 128.28       | (J/K)          |       |
| Oxygen          | delta<br>G                                   | moles<br>=                | =<br>-1041.63                               | 0.0039138<br>(J)                        | delta<br>H          | grams<br>=        | =<br>114.15        | 0.125237<br>(J) | S              | =        | 0.98          | (J/K)         | V       | =    | 385.16     | (cc)             | Cp                | =               | 0.14         | (J/K)          |       |
| *****-----***** |                                              |                           |                                             |                                         |                     |                   |                    |                 |                |          |               |               |         |      |            |                  |                   |                 |              |                |       |
| Model 828 Bokan |                                              |                           |                                             |                                         |                     |                   |                    |                 |                |          |               |               |         |      |            |                  |                   |                 |              |                |       |
| Temp (oC)       | =                                            | 905.47                    |                                             |                                         |                     |                   |                    |                 |                |          |               |               |         |      |            |                  |                   |                 |              |                |       |
| Constraint      | Flags:                                       | fO2                       | path                                        | =                                       | QFM                 | Fractionate       | Solids             |                 |                |          |               |               |         |      |            |                  |                   |                 |              |                |       |
| Liquid          | mass<br>G                                    | =                         | 41.33<br>-673385.38                         | (gm)<br>(J)                             | density<br>H        | =                 | 2.26<br>-543334.79 | (gm/cc)<br>(J)  | viscosity<br>S | =        | 4.8<br>110.34 | (log<br>(J/K) | 10<br>V | =    | poise<br>= | (analysis<br>H2O | in<br>(cc)<br>CO2 | wt<br>Cp<br>SO3 | =<br>%)<br>= | 57.21<br>F2O-1 | (J/K) |
|                 | SiO2<br>65.06                                | TiO2<br>0.19              | Al2O3<br>14.6                               | Fe2O3<br>0.87                           | Cr2O3<br>0          | FeO<br>3.2        | MnO<br>0.53        | MgO<br>0.63     | NiO<br>0       | CoO<br>0 | 3.28          | 4.44          | 2.81    | 0.51 | 3.88       | 0                | 0                 | 0               | 0            | 0              |       |
| opx             | mass<br>opx<br>G                             | =<br>Na0.00Ca0.04Fe"<br>= | 0.12<br>0.86Mg1.03Fe"<br>-1662.96           | (gm)<br>0.02Ti0.00Al0.10Si1.94O6<br>(J) | density<br>H        | =                 | 3.48<br>-1362.98   | (gm/cc)<br>(J)  | (analysis<br>S | in<br>=  | mole<br>=     | %)<br>(J/K)   | V       | =    | 0.03       | (cc)             | Cp                | =               | 0.14         | (J/K)          |       |
|                 | diopside<br>-88.11                           | clinoenstatit<br>95.55    | hedenbergite<br>86.49                       | alumino-buffo<br>3.58                   | buffonite<br>-3.47  | essenite<br>5.83  | jadeite<br>0.14    |                 |                |          |               |               |         |      |            |                  |                   |                 |              |                |       |
| feldspar        | mass<br>K0.02Na0.52Ca0.46Al1.46Si2.54O8<br>G | =                         | 0.78<br>-12999.01                           | (gm)<br>(J)                             | density<br>H        | =                 | 2.63<br>-10951.67  | (gm/cc)<br>(J)  | (analysis<br>S | in<br>=  | mole<br>=     | %)<br>(J/K)   | V       | =    | 0.3        | (cc)             | Cp                | =               | 0.94         | (J/K)          |       |
|                 | albite<br>52.21                              | anorthite<br>46.06        | sanidine<br>1.73                            |                                         |                     |                   |                    |                 |                |          |               |               |         |      |            |                  |                   |                 |              |                |       |
| spinel          | mass<br>Fe"1.11Mg0.10Fe"<br>G                | =                         | 0.09<br>1.41Al0.17Cr0.00Ti0.21O4<br>-667.36 | (gm)<br>(J)                             | density<br>H        | =                 | 4.85<br>-460.56    | (gm/cc)<br>(J)  | (analysis<br>S | in<br>=  | mole<br>=     | %)<br>(J/K)   | V       | =    | 0.02       | (cc)             | Cp                | =               | 0.08         | (J/K)          |       |
|                 | chromite<br>0                                | hercynite<br>-0.96        | magnetite<br>70.74                          | spinel<br>9.56                          | ulvospinel<br>20.66 |                   |                    |                 |                |          |               |               |         |      |            |                  |                   |                 |              |                |       |
| water           | mass<br>H2O<br>G                             | =                         | 1.4<br>-32902.38                            | (gm)<br>(J)                             | density<br>H        | =                 | 0.2<br>-16650.37   | (gm/cc)<br>(J)  | S              | =        | 13.79         | (J/K)         | V       | =    | 7.1        | (cc)             | Cp                | =               | 4.55         | (J/K)          |       |
| Total           | solids<br>G                                  | mass<br>=                 | =<br>-48231.71                              | 2.39<br>(J)                             | (gm)<br>H           | density<br>=      | =<br>-29425.58     | 0.32<br>(J)     | (gm/cc)<br>S   | =        | 15.96         | (J/K)         | V       | =    | 7.45       | (cc)             | Cp                | =               | 5.72         | (J/K)          |       |
| Summary         | of                                           | all                       | fractionated                                | phases:                                 | (total              | mass              | =                  | 55.76           | grams)         |          |               |               |         |      |            |                  |                   |                 |              |                |       |
| opx             | mass<br>opx<br>G                             | =<br>Na0.00Ca0.06Fe"<br>= | 5.48<br>0.69Mg1.19Fe"<br>-78075.99          | (gm)<br>0.02Ti0.00Al0.10Si1.94O6<br>(J) | density<br>H        | =                 | 3.41<br>-64418.04  | (gm/cc)<br>(J)  | (analysis<br>S | in<br>=  | mole<br>=     | %)<br>(J/K)   | V       | =    | 1.6        | (cc)             | Cp                | =               | 6.44         | (J/K)          |       |
|                 | diopside<br>-68.92                           | clinoenstatit<br>93.68    | hedenbergite<br>68.69                       | alumino-buffo<br>4.03                   | buffonite<br>-3.76  | essenite<br>6.14  | jadeite<br>0.13    |                 |                |          |               |               |         |      |            |                  |                   |                 |              |                |       |
| cpx             | mass<br>cpx<br>G                             | =<br>Na0.01Ca0.83Fe"<br>= | 7.44<br>0.24Mg0.75Fe"<br>-113525.23         | (gm)<br>0.06Ti0.03Al0.24Si1.83O6<br>(J) | density<br>H        | =                 | 3.31<br>-95262.86  | (gm/cc)<br>(J)  | (analysis<br>S | in<br>=  | mole<br>=     | %)<br>(J/K)   | V       | =    | 2.25       | (cc)             | Cp                | =               | 8.49         | (J/K)          |       |
|                 | diopside<br>41.95                            | clinoenstatit<br>15.49    | hedenbergite<br>24.27                       | alumino-buffo<br>10.61                  | buffonite<br>-5.51  | essenite<br>11.75 | jadeite<br>1.43    |                 |                |          |               |               |         |      |            |                  |                   |                 |              |                |       |
| feldspar        | mass<br>K0.01Na0.28Ca0.72Al1.72Si2.28O8<br>G | =                         | 38.64<br>-644997.04                         | (gm)<br>(J)                             | density<br>H        | =                 | 2.68<br>-545378.21 | (gm/cc)<br>(J)  | (analysis<br>S | in<br>=  | mole<br>=     | %)<br>(J/K)   | V       | =    | 14.44      | (cc)             | Cp                | =               | 46.33        | (J/K)          |       |
|                 | albite<br>27.74                              | anorthite<br>71.6         | sanidine<br>0.67                            |                                         |                     |                   |                    |                 |                |          |               |               |         |      |            |                  |                   |                 |              |                |       |

|                 |                                          |                                                      |              |               |            |             |             |          |           |     |        |       |      |        |           |      |     |        |        |       |
|-----------------|------------------------------------------|------------------------------------------------------|--------------|---------------|------------|-------------|-------------|----------|-----------|-----|--------|-------|------|--------|-----------|------|-----|--------|--------|-------|
| spinel          | mass                                     | =                                                    | 4.2          | (gm)          | density    | =           | 4.77        | (gm/cc)  | (analysis | in  | mole   | %)    |      |        |           |      |     |        |        |       |
|                 | Fe"1.11Mg0.17Fe"1.22Al0.23Cr0.00Ti0.27O4 |                                                      |              |               |            |             |             |          |           |     |        |       |      |        |           |      |     |        |        |       |
|                 | G                                        | =                                                    | -32539.81    | (J)           | H          | =           | -22928.27   | (J)      | S         | =   | 8.15   | (J/K) | V    | =      | 0.88      | (cc) | Cp  | =      | 3.84   | (J/K) |
|                 | chromite                                 | hercynite                                            | magnetite    | spinel        | ulvospinel |             |             |          |           |     |        |       |      |        |           |      |     |        |        |       |
|                 | 0                                        | -5.33                                                | 61.24        | 16.7          | 27.38      |             |             |          |           |     |        |       |      |        |           |      |     |        |        |       |
| Viscosity       | of                                       | the                                                  | System       | cannot        | be         | computed.   |             |          |           |     |        |       |      |        |           |      |     |        |        |       |
| System          | mass                                     | =                                                    | 99.48        | (gm)          | density    | =           | 2.21        | (gm/cc)  |           |     |        |       |      |        |           |      |     |        |        |       |
|                 | G                                        | =                                                    | -1590755.16  | (J)           | H          | =           | -1300747.75 | (J)      | S         | =   | 246.06 | (J/K) | V    | =      | 44.93     | (cc) | Cp  | =      | 128.03 | (J/K) |
| Oxygen          | delta                                    | moles                                                | =            | 0.0039973     | delta      | grams       | =           | 0.127909 |           |     |        |       |      |        |           |      |     |        |        |       |
|                 | G                                        | =                                                    | -1058.87     | (J)           | H          | =           | 115.87      | (J)      | S         | =   | 1      | (J/K) | V    | =      | 391.71    | (cc) | Cp  | =      | 0.14   | (J/K) |
| *****_*****     |                                          |                                                      |              |               |            |             |             |          |           |     |        |       |      |        |           |      |     |        |        |       |
| Model 828 Bokan |                                          |                                                      |              |               |            |             |             |          |           |     |        |       |      |        |           |      |     |        |        |       |
| Temp (oC)       | =                                        | 900.47                                               |              |               |            |             |             |          |           |     |        |       |      |        |           |      |     |        |        |       |
| Constraint      | Flags:                                   | fO2                                                  | path         | =             | QFM        | Fractionate | Solids      |          |           |     |        |       |      |        |           |      |     |        |        |       |
| Liquid          | mass                                     | =                                                    | 40.35        | (gm)          | density    | =           | 2.26        | (gm/cc)  | viscosity | =   | 4.87   | (log  | 10   | poise) | (analysis | in   | wt  | %)     |        |       |
|                 | G                                        | =                                                    | -657368.36   | (J)           | H          | =           | -531241.87  | (J)      | S         | =   | 107.47 | (J/K) | V    | =      | 17.89     | (cc) | Cp  | =      | 55.77  | (J/K) |
|                 | SiO2                                     | TiO2                                                 | Al2O3        | Fe2O3         | Cr2O3      | FeO         | MnO         | MgO      | NiO       | CoO | CaO    | Na2O  | K2O  | P2O5   | H2O       | CO2  | SO3 | Cl2O-1 | F2O-1  |       |
|                 | 65.45                                    | 0.18                                                 | 14.43        | 0.84          | 0          | 3.07        | 0.55        | 0.59     | 0         | 0   | 3.18   | 4.43  | 2.88 | 0.52   | 3.88      | 0    | 0   | 0      | 0      |       |
| opx             | mass                                     | =                                                    | 0.11         | (gm)          | density    | =           | 3.49        | (gm/cc)  | (analysis | in  | mole   | %)    |      |        |           |      |     |        |        |       |
|                 | opx                                      | Na0.00Ca0.04Fe"0.88Mg1.02Fe"0.02Ti0.00Al0.10Si1.94O6 |              |               |            |             |             |          |           |     |        |       |      |        |           |      |     |        |        |       |
|                 | G                                        | =                                                    | -1538.16     | (J)           | H          | =           | -1261.59    | (J)      | S         | =   | 0.24   | (J/K) | V    | =      | 0.03      | (cc) | Cp  | =      | 0.13   | (J/K) |
|                 | diopside                                 | clinoenstatit                                        | hedenbergite | alumino-buffo | buffonite  | essenite    | jadeite     |          |           |     |        |       |      |        |           |      |     |        |        |       |
|                 | -89.78                                   | 95.72                                                | 88.01        | 3.56          | -3.45      | 5.81        | 0.14        |          |           |     |        |       |      |        |           |      |     |        |        |       |
| feldspar        | mass                                     | =                                                    | 0.75         | (gm)          | density    | =           | 2.62        | (gm/cc)  | (analysis | in  | mole   | %)    |      |        |           |      |     |        |        |       |
|                 | K0.02Na0.54Ca0.45Al1.45Si2.55O8          |                                                      |              |               |            |             |             |          |           |     |        |       |      |        |           |      |     |        |        |       |
|                 | G                                        | =                                                    | -12565.28    | (J)           | H          | =           | -10595.68   | (J)      | S         | =   | 1.68   | (J/K) | V    | =      | 0.29      | (cc) | Cp  | =      | 0.91   | (J/K) |
|                 | albite                                   | anorthite                                            | sanidine     |               |            |             |             |          |           |     |        |       |      |        |           |      |     |        |        |       |
|                 | 53.64                                    | 44.51                                                | 1.84         |               |            |             |             |          |           |     |        |       |      |        |           |      |     |        |        |       |
| spinel          | mass                                     | =                                                    | 0.09         | (gm)          | density    | =           | 4.86        | (gm/cc)  | (analysis | in  | mole   | %)    |      |        |           |      |     |        |        |       |
|                 | Fe"1.11Mg0.09Fe"1.43Al0.17Cr0.00Ti0.20O4 |                                                      |              |               |            |             |             |          |           |     |        |       |      |        |           |      |     |        |        |       |
|                 | G                                        | =                                                    | -621.25      | (J)           | H          | =           | -429.13     | (J)      | S         | =   | 0.16   | (J/K) | V    | =      | 0.02      | (cc) | Cp  | =      | 0.08   | (J/K) |
|                 | chromite                                 | hercynite                                            | magnetite    | spinel        | ulvospinel |             |             |          |           |     |        |       |      |        |           |      |     |        |        |       |
|                 | 0                                        | -0.77                                                | 71.37        | 9.2           | 20.19      |             |             |          |           |     |        |       |      |        |           |      |     |        |        |       |
| water           | mass                                     | =                                                    | 1.44         | (gm)          | density    | =           | 0.2         | (gm/cc)  |           |     |        |       |      |        |           |      |     |        |        |       |
|                 | H2O                                      |                                                      |              |               |            |             |             |          |           |     |        |       |      |        |           |      |     |        |        |       |
|                 | G                                        | =                                                    | -33710.08    | (J)           | H          | =           | -17118.34   | (J)      | S         | =   | 14.14  | (J/K) | V    | =      | 7.24      | (cc) | Cp  | =      | 4.69   | (J/K) |
| Total           | solids                                   | mass                                                 | =            | 2.39          | (gm)       | density     | =           | 0.32     | (gm/cc)   |     |        |       |      |        |           |      |     |        |        |       |
|                 | G                                        | =                                                    | -48434.77    | (J)           | H          | =           | -29404.74   | (J)      | S         | =   | 16.22  | (J/K) | V    | =      | 7.58      | (cc) | Cp  | =      | 5.81   | (J/K) |
| Summary         | of                                       | all                                                  | fractionated | phases:       | (total     | mass        | =           | 56.74    | grams)    |     |        |       |      |        |           |      |     |        |        |       |
| opx             | mass                                     | =                                                    | 5.6          | (gm)          | density    | =           | 3.42        | (gm/cc)  | (analysis | in  | mole   | %)    |      |        |           |      |     |        |        |       |
|                 | opx                                      | Na0.00Ca0.06Fe"0.69Mg1.18Fe"0.02Ti0.00Al0.10Si1.94O6 |              |               |            |             |             |          |           |     |        |       |      |        |           |      |     |        |        |       |
|                 | G                                        | =                                                    | -79648.58    | (J)           | H          | =           | -65788.13   | (J)      | S         | =   | 11.81  | (J/K) | V    | =      | 1.64      | (cc) | Cp  | =      | 6.57   | (J/K) |
|                 | diopside                                 | clinoenstatit                                        | hedenbergite | alumino-buffo | buffonite  | essenite    | jadeite     |          |           |     |        |       |      |        |           |      |     |        |        |       |
|                 | -69.32                                   | 93.72                                                | 69.06        | 4.02          | -3.75      | 6.13        | 0.13        |          |           |     |        |       |      |        |           |      |     |        |        |       |
| cpx             | mass                                     | =                                                    | 7.44         | (gm)          | density    | =           | 3.31        | (gm/cc)  | (analysis | in  | mole   | %)    |      |        |           |      |     |        |        |       |
|                 | cpx                                      | Na0.01Ca0.83Fe"0.24Mg0.75Fe"0.06Ti0.03Al0.24Si1.83O6 |              |               |            |             |             |          |           |     |        |       |      |        |           |      |     |        |        |       |
|                 | G                                        | =                                                    | -113447.85   | (J)           | H          | =           | -95305.28   | (J)      | S         | =   | 15.46  | (J/K) | V    | =      | 2.25      | (cc) | Cp  | =      | 8.48   | (J/K) |

|                 |                                                   |                        |                       |                        |                     |                   |                 |         |              |     |        |       |      |        |           |      |     |        |       |       |  |
|-----------------|---------------------------------------------------|------------------------|-----------------------|------------------------|---------------------|-------------------|-----------------|---------|--------------|-----|--------|-------|------|--------|-----------|------|-----|--------|-------|-------|--|
|                 | diopside<br>41.95                                 | clinoenstatit<br>15.49 | hedenbergite<br>24.27 | alumino-buffo<br>10.61 | buffonite<br>-5.51  | essenite<br>11.75 | jadeite<br>1.43 |         |              |     |        |       |      |        |           |      |     |        |       |       |  |
| feldspar        | mass<br>K0.01Na0.28Ca0.71Al1.71Si2.29O8           | =                      | 39.42                 | (gm)                   | density             | =                 | 2.67            | (gm/cc) | (analysis    | in  | mole   | %)    |      |        |           |      |     |        |       |       |  |
|                 | G                                                 | =                      | -657522.8             | (J)                    | H                   | =                 | -556526.91      | (J)     | S            | =   | 86.06  | (J/K) | V    | =      | 14.74     | (cc) | Cp  | =      | 47.24 | (J/K) |  |
|                 | albite<br>28.22                                   | anorthite<br>71.09     | sanidine<br>0.69      |                        |                     |                   |                 |         |              |     |        |       |      |        |           |      |     |        |       |       |  |
| spinel          | mass<br>Fe"1.11Mg0.17Fe""1.23Al0.23Cr0.00Ti0.27O4 | =                      | 4.29                  | (gm)                   | density             | =                 | 4.77            | (gm/cc) | (analysis    | in  | mole   | %)    |      |        |           |      |     |        |       |       |  |
|                 | G                                                 | =                      | -33149.58             | (J)                    | H                   | =                 | -23397.23       | (J)     | S            | =   | 8.31   | (J/K) | V    | =      | 0.9       | (cc) | Cp  | =      | 3.92  | (J/K) |  |
|                 | chromite<br>0                                     | hercynite<br>-5.24     | magnetite<br>61.43    | spinel<br>16.56        | ulvospinel<br>27.25 |                   |                 |         |              |     |        |       |      |        |           |      |     |        |       |       |  |
| Viscosity       | of                                                | the                    | System                | cannot                 | be                  | computed.         |                 |         |              |     |        |       |      |        |           |      |     |        |       |       |  |
| System          | mass<br>G                                         | =                      | 99.48                 | (gm)                   | density             | =                 | 2.21            | (gm/cc) |              |     |        |       |      |        |           |      |     |        |       |       |  |
|                 | G                                                 | =                      | -1589571.94           | (J)                    | H                   | =                 | -1301664.17     | (J)     | S            | =   | 245.32 | (J/K) | V    | =      | 44.99     | (cc) | Cp  | =      | 127.8 | (J/K) |  |
| Oxygen          | delta<br>G                                        | moles<br>=             | =                     | 0.00407547             | delta<br>H          | grams<br>=        | =               | 0.13041 | S            | =   | 1.02   | (J/K) | V    | =      | 397.68    | (cc) | Cp  | =      | 0.14  | (J/K) |  |
| *****-----***** |                                                   |                        |                       |                        |                     |                   |                 |         |              |     |        |       |      |        |           |      |     |        |       |       |  |
| Model 828 Bokan |                                                   |                        |                       |                        |                     |                   |                 |         |              |     |        |       |      |        |           |      |     |        |       |       |  |
| Temp (oC)       | =                                                 | 895.47                 |                       |                        |                     |                   |                 |         |              |     |        |       |      |        |           |      |     |        |       |       |  |
| Constraint      | Flags:                                            | fO2                    | path                  | =                      | QFM                 | Fractionate       | Solids          |         |              |     |        |       |      |        |           |      |     |        |       |       |  |
| Liquid          | mass<br>G                                         | =                      | 39.4                  | (gm)                   | density             | =                 | 2.25            | (gm/cc) | viscosity    | =   | 4.94   | (log  | 10   | poise) | (analysis | in   | wt  | %)     |       |       |  |
|                 | SiO2                                              | TiO2                   | Al2O3                 | Fe2O3                  | Cr2O3               | FeO               | MnO             | MgO     | NiO          | CoO | CaO    | Na2O  | K2O  | P2O5   | H2O       | CO2  | SO3 | Cl2O-1 | F2O-1 |       |  |
|                 | 65.82                                             | 0.17                   | 14.27                 | 0.82                   | 0                   | 2.95              | 0.56            | 0.55    | 0            | 0   | 3.09   | 4.42  | 2.94 | 0.53   | 3.88      | 0    | 0   | 0      | 0     |       |  |
| opx             | mass<br>opx<br>G                                  | =                      | 0.11                  | (gm)                   | density             | =                 | 3.5             | (gm/cc) | (analysis    | in  | mole   | %)    |      |        |           |      |     |        |       |       |  |
|                 | G                                                 | =                      | -1424.44              | (J)                    | H                   | =                 | -1169.15        | (J)     | S            | =   | 0.22   | (J/K) | V    | =      | 0.03      | (cc) | Cp  | =      | 0.12  | (J/K) |  |
|                 | diopside<br>-91.46                                | clinoenstatit<br>95.89 | hedenbergite<br>89.54 | alumino-buffo<br>3.53  | buffonite<br>-3.44  | essenite<br>5.8   | jadeite<br>0.14 |         |              |     |        |       |      |        |           |      |     |        |       |       |  |
| feldspar        | mass<br>K0.02Na0.55Ca0.43Al1.43Si2.57O8           | =                      | 0.73                  | (gm)                   | density             | =                 | 2.62            | (gm/cc) | (analysis    | in  | mole   | %)    |      |        |           |      |     |        |       |       |  |
|                 | G                                                 | =                      | -12153.71             | (J)                    | H                   | =                 | -10257.82       | (J)     | S            | =   | 1.62   | (J/K) | V    | =      | 0.28      | (cc) | Cp  | =      | 0.88  | (J/K) |  |
|                 | albite<br>55.04                                   | anorthite<br>43        | sanidine<br>1.96      |                        |                     |                   |                 |         |              |     |        |       |      |        |           |      |     |        |       |       |  |
| spinel          | mass<br>Fe"1.11Mg0.09Fe""1.44Al0.17Cr0.00Ti0.20O4 | =                      | 0.08                  | (gm)                   | density             | =                 | 4.86            | (gm/cc) | (analysis    | in  | mole   | %)    |      |        |           |      |     |        |       |       |  |
|                 | G                                                 | =                      | -578.62               | (J)                    | H                   | =                 | -400.08         | (J)     | S            | =   | 0.15   | (J/K) | V    | =      | 0.02      | (cc) | Cp  | =      | 0.07  | (J/K) |  |
|                 | chromite<br>0                                     | hercynite<br>-0.59     | magnetite<br>72       | spinel<br>8.85         | ulvospinel<br>19.74 |                   |                 |         |              |     |        |       |      |        |           |      |     |        |       |       |  |
| water           | mass<br>H2O<br>G                                  | =                      | 1.47                  | (gm)                   | density             | =                 | 0.2             | (gm/cc) |              |     |        |       |      |        |           |      |     |        |       |       |  |
|                 | G                                                 | =                      | -34487.61             | (J)                    | H                   | =                 | -17574.03       | (J)     | S            | =   | 14.47  | (J/K) | V    | =      | 7.37      | (cc) | Cp  | =      | 4.83  | (J/K) |  |
| Total           | solids<br>G                                       | mass<br>=              | =                     | 2.39                   | (gm)<br>H           | density<br>=      | =               | 0.31    | (gm/cc)<br>S | =   | 16.47  | (J/K) | V    | =      | 7.7       | (cc) | Cp  | =      | 5.9   | (J/K) |  |
| Summary         | of                                                | all                    | fractionated          | phases:                | (total              | mass              | =               | 57.69   | grams)       |     |        |       |      |        |           |      |     |        |       |       |  |

[illegible]

|                 |                                                        |                        |                        |                        |                     |                   |                     |                 |                |          |               |               |             |              |                |                  |           |           |             |            |
|-----------------|--------------------------------------------------------|------------------------|------------------------|------------------------|---------------------|-------------------|---------------------|-----------------|----------------|----------|---------------|---------------|-------------|--------------|----------------|------------------|-----------|-----------|-------------|------------|
| water           | mass<br>H2O<br>G                                       | =<br><br>=             | 1.51<br><br>-35236.38  | (gm)<br>(J)            | density<br>H        | =<br>=            | 0.2<br>-18018.06    | (gm/cc)<br>(J)  | S              | =        | 14.8          | (J/K)         | V           | =            | 7.49           | (cc)             | Cp        | =         | 4.96        | (J/K)      |
| Total           | solids<br>G                                            | mass<br>=              | =<br>-48858.04         | 2.39<br>(J)            | (gm)<br>H           | density<br>=      | =<br>-29412         | 0.31<br>(J)     | (gm/cc)<br>S   | =        | 16.71         | (J/K)         | V           | =            | 7.81           | (cc)             | Cp        | =         | 5.99        | (J/K)      |
| Summary         | of                                                     | all                    | fractionated           | phases:                | (total              | mass              | =                   | 58.6            | grams)         |          |               |               |             |              |                |                  |           |           |             |            |
| opx             | mass<br>opx<br>G                                       | =<br><br>=             | 5.81<br><br>-82427.73  | (gm)<br>(J)            | density<br>H        | =<br>=            | 3.42<br>-68235.03   | (gm/cc)<br>(J)  | (analysis<br>S | in<br>=  | mole<br>12.2  | %<br>(J/K)    | V           | =            | 1.7            | (cc)             | Cp        | =         | 6.81        | (J/K)      |
|                 | diopside<br>-70.08                                     | clinoenstatit<br>93.8  | hedenbergite<br>69.76  | alumino-buffo<br>4     | buffonite<br>-3.74  | essenite<br>6.12  | jadeite<br>0.13     |                 |                |          |               |               |             |              |                |                  |           |           |             |            |
| cpx             | mass<br>cpx<br>G                                       | =<br><br>=             | 7.44<br><br>-113293.63 | (gm)<br>(J)            | density<br>H        | =<br>=            | 3.31<br>-95390.07   | (gm/cc)<br>(J)  | (analysis<br>S | in<br>=  | mole<br>15.39 | %<br>(J/K)    | V           | =            | 2.25           | (cc)             | Cp        | =         | 8.47        | (J/K)      |
|                 | diopside<br>41.95                                      | clinoenstatit<br>15.49 | hedenbergite<br>24.27  | alumino-buffo<br>10.61 | buffonite<br>-5.51  | essenite<br>11.75 | jadeite<br>1.43     |                 |                |          |               |               |             |              |                |                  |           |           |             |            |
| feldspar        | mass<br>K0.01Na0.29Ca0.70Al1.70Si2.30O8<br>G           | =<br><br>=             | 40.9<br><br>-681274.02 | (gm)<br>(J)            | density<br>H        | =<br>=            | 2.67<br>-577787.5   | (gm/cc)<br>(J)  | (analysis<br>S | in<br>=  | mole<br>88.93 | %<br>(J/K)    | V           | =            | 15.3           | (cc)             | Cp        | =         | 48.97       | (J/K)      |
|                 | albite<br>29.18                                        | anorthite<br>70.09     | sanidine<br>0.73       |                        |                     |                   |                     |                 |                |          |               |               |             |              |                |                  |           |           |             |            |
| spinel          | mass<br>Fe"1.11Mg0.16Fe""1.24Al0.22Cr0.00Ti0.27O4<br>G | =<br><br>=             | 4.45<br><br>-34232.37  | (gm)<br>(J)            | density<br>H        | =<br>=            | 4.77<br>-24244.43   | (gm/cc)<br>(J)  | (analysis<br>S | in<br>=  | mole<br>8.58  | %<br>(J/K)    | V           | =            | 0.93           | (cc)             | Cp        | =         | 4.06        | (J/K)      |
|                 | chromite<br>0                                          | hercynite<br>-5.08     | magnetite<br>61.8      | spinel<br>16.29        | ulvospinel<br>26.99 |                   |                     |                 |                |          |               |               |             |              |                |                  |           |           |             |            |
| Viscosity       | of                                                     | the                    | System                 | cannot                 | be                  | computed.         |                     |                 |                |          |               |               |             |              |                |                  |           |           |             |            |
| System          | mass<br>G                                              | =<br>=                 | 99.48<br>-1587208.77   | (gm)<br>(J)            | density<br>H        | =<br>=            | 2.21<br>-1303452.48 | (gm/cc)<br>(J)  | S              | =        | 243.86        | (J/K)         | V           | =            | 45.09          | (cc)             | Cp        | =         | 127.36      | (J/K)      |
| Oxygen          | delta<br>G                                             | moles<br>=             | =<br>-1101.35          | 0.00421714<br>(J)      | delta<br>H          | grams<br>=        | =<br>120            | 0.134943<br>(J) | S              | =        | 1.05          | (J/K)         | V           | =            | 407.99         | (cc)             | Cp        | =         | 0.15        | (J/K)      |
| *****-----***** |                                                        |                        |                        |                        |                     |                   |                     |                 |                |          |               |               |             |              |                |                  |           |           |             |            |
| Model 828 Bokan |                                                        |                        |                        |                        |                     |                   |                     |                 |                |          |               |               |             |              |                |                  |           |           |             |            |
| Temp (oC)       | =                                                      | 885.47                 |                        |                        |                     |                   |                     |                 |                |          |               |               |             |              |                |                  |           |           |             |            |
| Constraint      | Flags:                                                 | fO2                    | path                   | =                      | QFM                 | Fractionate       | Solids              |                 |                |          |               |               |             |              |                |                  |           |           |             |            |
| Liquid          | mass<br>G                                              | =<br>=                 | 37.63<br>-612829.15    | (gm)<br>(J)            | density<br>H        | =<br>=            | 2.25<br>-497569.29  | (gm/cc)<br>(J)  | viscosity<br>S | =<br>=   | 5.07<br>99.48 | (log<br>(J/K) | 10<br>V     | =<br>=       | poise<br>16.73 | (analysis<br>H2O | in<br>CO2 | wt<br>SO3 | %<br>Cl2O-1 | =<br>F2O-1 |
|                 | SiO2<br>66.55                                          | TiO2<br>0.16           | Al2O3<br>13.93         | Fe2O3<br>0.77          | Cr2O3<br>0          | FeO<br>2.71       | MnO<br>0.58         | MgO<br>0.49     | NiO<br>0       | CoO<br>0 | CaO<br>2.92   | Na2O<br>4.39  | K2O<br>3.06 | P2O5<br>0.56 | 3.88           | 0                | 0         | 0         | 0           | 0          |
| opx             | mass<br>opx<br>G                                       | =<br><br>=             | 0.09<br><br>-1225.67   | (gm)<br>(J)            | density<br>H        | =<br>=            | 3.51<br>-1007.44    | (gm/cc)<br>(J)  | (analysis<br>S | in<br>=  | mole<br>0.19  | %<br>(J/K)    | V           | =            | 0.03           | (cc)             | Cp        | =         | 0.1         | (J/K)      |
|                 | diopside<br>-94.8                                      | clinoenstatit<br>96.23 | hedenbergite<br>92.58  | alumino-buffo<br>3.49  | buffonite<br>-3.4   | essenite<br>5.77  | jadeite<br>0.13     |                 |                |          |               |               |             |              |                |                  |           |           |             |            |
| feldspar        | mass<br>K0.02Na0.58Ca0.40Al1.40Si2.60O8<br>G           | =<br>=                 | 0.68<br>-11387.68      | (gm)<br>(J)            | density<br>H        | =<br>=            | 2.62<br>-9628.68    | (gm/cc)<br>(J)  | (analysis<br>S | in<br>=  | mole<br>1.52  | %<br>(J/K)    | V           | =            | 0.26           | (cc)             | Cp        | =         | 0.83        | (J/K)      |

|                 |                                                       |                    |                                                                   |                                |                           |                    |                                  |                               |                            |         |                              |                               |                        |                             |                                   |                        |                      |                         |                     |       |
|-----------------|-------------------------------------------------------|--------------------|-------------------------------------------------------------------|--------------------------------|---------------------------|--------------------|----------------------------------|-------------------------------|----------------------------|---------|------------------------------|-------------------------------|------------------------|-----------------------------|-----------------------------------|------------------------|----------------------|-------------------------|---------------------|-------|
|                 | albite<br>57.73                                       | anorthite<br>40.05 | sanidine<br>2.22                                                  |                                |                           |                    |                                  |                               |                            |         |                              |                               |                        |                             |                                   |                        |                      |                         |                     |       |
| spinel          | mass<br>Fe"1.11Mg0.08Fe"1.46Al0.16Cr0.00Ti0.19O4<br>G | =                  | 0.07<br>-502.57<br>magnetite<br>73.2                              | (gm)<br>(J)<br>spinel<br>8.2   | density<br>H<br>=         | =                  | 4.88<br>-348.21<br>(J)           | (gm/cc)<br>(J)                | (analysis<br>S             | in<br>= | mole<br>0.13                 | (%)<br>(J/K)                  | V                      | =                           | 0.01                              | (cc)                   | Cp                   | =                       | 0.06<br>(J/K)       |       |
| water           | mass<br>H2O<br>G                                      | =                  | 1.54<br>-35957.67<br>(J)                                          | (gm)<br>(J)                    | density<br>H<br>=         | =                  | 0.2<br>-18450.94<br>(J)          | (gm/cc)<br>(J)                | (analysis<br>S             | =       | 15.11                        | (J/K)                         | V                      | =                           | 7.61                              | (cc)                   | Cp                   | =                       | 5.09<br>(J/K)       |       |
| Total           | solids<br>G                                           | mass<br>=          | =<br>-49073.59<br>(J)                                             | 2.39<br>(J)                    | (gm)<br>H<br>density<br>= | =                  | =<br>-29435.28<br>(J)            | 0.3<br>(J)                    | (gm/cc)<br>S               | =       | 16.95                        | (J/K)                         | V                      | =                           | 7.91                              | (cc)                   | Cp                   | =                       | 6.08<br>(J/K)       |       |
| Summary         | of                                                    | all                | fractionated                                                      | phases:                        | (total                    | mass               | =                                | 59.47                         | grams)                     |         |                              |                               |                        |                             |                                   |                        |                      |                         |                     |       |
| opx             | mass<br>opx<br>G                                      | =                  | 5.9<br>Na0.00Ca0.06Fe"0.70Mg1.17Fe"0.02Ti0.00Al0.10Si1.94O6<br>=  | (gm)<br>(J)                    | density<br>H<br>=         | =                  | 3.42<br>-69328.71<br>(J)         | (gm/cc)<br>(J)                | (analysis<br>S             | in<br>= | mole<br>12.37                | (%)<br>(J/K)                  | V                      | =                           | 1.72                              | (cc)                   | Cp                   | =                       | 6.92<br>(J/K)       |       |
|                 | diopside<br>-70.44                                    | =                  | -83655.43<br>clinoenstatit<br>93.83                               | hedenbergite<br>70.1           | alumino-buffo<br>3.99     | buffonite<br>-3.73 | essenite<br>6.11                 | jadeite<br>0.13               |                            |         |                              |                               |                        |                             |                                   |                        |                      |                         |                     |       |
| cpx             | mass<br>cpx<br>G                                      | =                  | 7.44<br>Na0.01Ca0.83Fe"0.24Mg0.75Fe"0.06Ti0.03Al0.24Si1.83O6<br>= | (gm)<br>(J)                    | density<br>H<br>=         | =                  | 3.31<br>-95432.42<br>(J)         | (gm/cc)<br>(J)                | (analysis<br>S             | in<br>= | mole<br>15.35                | (%)<br>(J/K)                  | V                      | =                           | 2.25                              | (cc)                   | Cp                   | =                       | 8.47<br>(J/K)       |       |
|                 | diopside<br>41.95                                     | =                  | -113216.79<br>clinoenstatit<br>15.49                              | hedenbergite<br>24.27          | alumino-buffo<br>10.61    | buffonite<br>-5.51 | essenite<br>11.75                | jadeite<br>1.43               |                            |         |                              |                               |                        |                             |                                   |                        |                      |                         |                     |       |
| feldspar        | mass<br>K0.01Na0.30Ca0.70Al1.70Si2.30O8<br>G          | =                  | 41.6<br>-692541.97<br>sanidine<br>0.75                            | (gm)<br>(J)                    | density<br>H<br>=         | =                  | 2.67<br>-587933.34<br>(J)        | (gm/cc)<br>(J)                | (analysis<br>S             | in<br>= | mole<br>90.29                | (%)<br>(J/K)                  | V                      | =                           | 15.56                             | (cc)                   | Cp                   | =                       | 49.79<br>(J/K)      |       |
|                 | albite<br>29.65                                       | =                  | anorthite<br>69.6                                                 |                                |                           |                    |                                  |                               |                            |         |                              |                               |                        |                             |                                   |                        |                      |                         |                     |       |
| spinel          | mass<br>Fe"1.11Mg0.16Fe"1.24Al0.22Cr0.00Ti0.27O4<br>G | =                  | 4.52<br>-34712.15<br>magnetite<br>61.97                           | (gm)<br>(J)<br>spinel<br>16.17 | density<br>H<br>=         | =                  | 4.78<br>-24627.13<br>(J)         | (gm/cc)<br>(J)                | (analysis<br>S             | in<br>= | mole<br>8.7                  | (%)<br>(J/K)                  | V                      | =                           | 0.95                              | (cc)                   | Cp                   | =                       | 4.13<br>(J/K)       |       |
|                 | chromite<br>0                                         | =                  | hercynite<br>-5                                                   |                                |                           |                    |                                  |                               |                            |         |                              |                               |                        |                             |                                   |                        |                      |                         |                     |       |
| Viscosity       | of                                                    | the                | System                                                            | cannot                         | be                        | computed.          |                                  |                               |                            |         |                              |                               |                        |                             |                                   |                        |                      |                         |                     |       |
| System          | mass<br>G                                             | =                  | 99.48<br>-1586029.08<br>(J)                                       | (gm)<br>(J)                    | density<br>H<br>=         | =                  | 2.2<br>-1304326.17<br>(J)        | (gm/cc)<br>(J)                | (analysis<br>S             | =       | 243.14                       | (J/K)                         | V                      | =                           | 45.13                             | (cc)                   | Cp                   | =                       | 127.16<br>(J/K)     |       |
| Oxygen          | delta<br>G                                            | moles<br>=         | =<br>-1112.75<br>(J)                                              | 0.00428121<br>(J)              | delta<br>H                | grams<br>=         | =<br>121.06<br>(J)               | 0.136993<br>(J)               | (analysis<br>S             | =       | 1.06                         | (J/K)                         | V                      | =                           | 412.41                            | (cc)                   | Cp                   | =                       | 0.15<br>(J/K)       |       |
| *****-----***** |                                                       |                    |                                                                   |                                |                           |                    |                                  |                               |                            |         |                              |                               |                        |                             |                                   |                        |                      |                         |                     |       |
| Model 828 Bokan |                                                       |                    |                                                                   |                                |                           |                    |                                  |                               |                            |         |                              |                               |                        |                             |                                   |                        |                      |                         |                     |       |
| Temp (oC)       | =                                                     | 880.47             |                                                                   |                                |                           |                    |                                  |                               |                            |         |                              |                               |                        |                             |                                   |                        |                      |                         |                     |       |
| Constraint      | Flags:                                                | fO2                | path                                                              | =                              | QFM                       | Fractionate        | Solids                           |                               |                            |         |                              |                               |                        |                             |                                   |                        |                      |                         |                     |       |
| Liquid          | mass<br>G                                             | =                  | 36.79<br>-599049.67<br>SiO2<br>66.9                               | (gm)<br>(J)<br>Fe2O3<br>0.75   | density<br>H<br>=         | =                  | 2.25<br>-487136.89<br>MnO<br>0.6 | (gm/cc)<br>(J)<br>MgO<br>0.46 | viscosity<br>S<br>NiO<br>0 | =       | 5.13<br>97.01<br>CaO<br>2.84 | (log<br>(J/K)<br>Na2O<br>4.36 | 10<br>V<br>K2O<br>3.13 | poise)<br>=<br>P2O5<br>0.57 | (analysis<br>16.37<br>H2O<br>3.88 | in<br>(cc)<br>CO2<br>0 | wt<br>Cp<br>SO3<br>0 | (%)<br>=<br>Cl2O-1<br>0 | 50.54<br>F2O-1<br>0 | (J/K) |



|           |                                              |                           |                                                      |                        |                     |                           |                           |                |         |               |              |       |   |       |        |      |    |       |        |       |
|-----------|----------------------------------------------|---------------------------|------------------------------------------------------|------------------------|---------------------|---------------------------|---------------------------|----------------|---------|---------------|--------------|-------|---|-------|--------|------|----|-------|--------|-------|
| opx       | mass<br>opx<br>G                             | =<br>Na0.00Ca0.03Fe"<br>= | 0.09<br>0.94Mg0.96Fe"<br>-1138.67<br>(J)             | (gm)<br>(J)            | density<br>=        | 3.52<br>-936.62<br>(J)    | (gm/cc)<br>(J)            | (analysis<br>S | in<br>= | mole<br>0.18  | (%)<br>(J/K) | V     | = | 0.02  | (cc)   | Cp   | =  | 0.1   | (J/K)  |       |
|           | diopside<br>-96.45                           | clinoenstatit<br>96.39    | hedenbergite<br>94.1                                 | alumino-buffo<br>3.46  | buffonite<br>-3.38  | essenite<br>5.75          | jadeite<br>0.13           |                |         |               |              |       |   |       |        |      |    |       |        |       |
| feldspar  | mass<br>K0.02Na0.59Ca0.39Al1.39Si2.61O8<br>G | =<br>=                    | 0.66<br>-11029.35<br>(J)                             | (gm)<br>(J)            | density<br>=        | 2.61<br>-9334.21<br>(J)   | (gm/cc)<br>(J)            | (analysis<br>S | in<br>= | mole<br>1.47  | (%)<br>(J/K) | V     | = | 0.25  | (cc)   | Cp   | =  | 0.8   | (J/K)  |       |
|           | albite<br>59.02                              | anorthite<br>38.62        | sanidine<br>2.36                                     |                        |                     |                           |                           |                |         |               |              |       |   |       |        |      |    |       |        |       |
| spinel    | mass<br>Fe"1.11Mg0.08Fe"<br>G                | =<br>=                    | 0.07<br>1.48Al0.16Cr0.00Ti0.18O4<br>-468.61<br>(J)   | (gm)<br>(J)            | density<br>=        | 4.88<br>-325.04<br>(J)    | (gm/cc)<br>(J)            | (analysis<br>S | in<br>= | mole<br>0.12  | (%)<br>(J/K) | V     | = | 0.01  | (cc)   | Cp   | =  | 0.06  | (J/K)  |       |
|           | chromite<br>0                                | hercynite<br>-0.12        | magnetite<br>73.77                                   | spinel<br>7.89         | ulvospinel<br>18.45 |                           |                           |                |         |               |              |       |   |       |        |      |    |       |        |       |
| water     | mass<br>H2O<br>G                             | =<br>=                    | 1.57<br>-36652.62<br>(J)                             | (gm)<br>(J)            | density<br>=        | 0.2<br>-18873.13<br>(J)   | (gm/cc)<br>(J)            |                |         |               |              |       |   |       |        |      |    |       |        |       |
|           |                                              |                           |                                                      |                        |                     |                           |                           | S              | =       | 15.41         | (J/K)        | V     | = | 7.72  | (cc)   | Cp   | =  | 5.21  | (J/K)  |       |
| Total     | solids<br>G                                  | mass<br>=                 | =<br>-49289.25<br>(J)                                | 2.39<br>(J)            | (gm)<br>H           | density<br>=              | =<br>-29469<br>(J)        | (gm/cc)<br>S   |         |               |              |       |   |       |        |      |    |       |        |       |
|           |                                              |                           |                                                      |                        |                     |                           |                           |                | =       | 17.18         | (J/K)        | V     | = | 8.01  | (cc)   | Cp   | =  | 6.17  | (J/K)  |       |
| Summary   | of                                           | all                       | fractionated                                         | phases:                | (total              | mass                      | =                         | 60.31          | grams)  |               |              |       |   |       |        |      |    |       |        |       |
| opx       | mass<br>opx<br>G                             | =<br>Na0.00Ca0.06Fe"<br>= | 5.99<br>0.70Mg1.17Fe"<br>-84787.49<br>(J)            | (gm)<br>(J)            | density<br>=        | 3.42<br>-70345.64<br>(J)  | (gm/cc)<br>(J)            | (analysis<br>S | in<br>= | mole<br>12.52 | (%)<br>(J/K) | V     | = | 1.75  | (cc)   | Cp   | =  | 7.01  | (J/K)  |       |
|           | diopside<br>-70.79                           | clinoenstatit<br>93.87    | hedenbergite<br>70.42                                | alumino-buffo<br>3.99  | buffonite<br>-3.73  | essenite<br>6.11          | jadeite<br>0.13           |                |         |               |              |       |   |       |        |      |    |       |        |       |
| cpx       | mass<br>cpx<br>G                             | =<br>Na0.01Ca0.83Fe"<br>= | 7.44<br>0.24Mg0.75Fe"<br>-113140.13<br>(J)           | (gm)<br>(J)            | density<br>=        | 3.31<br>-95474.76<br>(J)  | (gm/cc)<br>(J)            | (analysis<br>S | in<br>= | mole<br>15.31 | (%)<br>(J/K) | V     | = | 2.25  | (cc)   | Cp   | =  | 8.46  | (J/K)  |       |
|           | diopside<br>41.95                            | clinoenstatit<br>15.49    | hedenbergite<br>24.27                                | alumino-buffo<br>10.61 | buffonite<br>-5.51  | essenite<br>11.75         | jadeite<br>1.43           |                |         |               |              |       |   |       |        |      |    |       |        |       |
| feldspar  | mass<br>K0.01Na0.30Ca0.69Al1.69Si2.31O8<br>G | =<br>=                    | 42.28<br>-703429.39<br>(J)                           | (gm)<br>(J)            | density<br>=        | 2.67<br>-597775.77<br>(J) | (gm/cc)<br>(J)            | (analysis<br>S | in<br>= | mole<br>91.58 | (%)<br>(J/K) | V     | = | 15.82 | (cc)   | Cp   | =  | 50.59 | (J/K)  |       |
|           | albite<br>30.11                              | anorthite<br>69.11        | sanidine<br>0.78                                     |                        |                     |                           |                           |                |         |               |              |       |   |       |        |      |    |       |        |       |
| spinel    | mass<br>Fe"1.11Mg0.16Fe"<br>G                | =<br>=                    | 4.59<br>1.24Al0.22Cr0.00Ti0.27O4<br>-35154.86<br>(J) | (gm)<br>(J)            | density<br>=        | 4.78<br>-24985.22<br>(J)  | (gm/cc)<br>(J)            | (analysis<br>S | in<br>= | mole<br>8.82  | (%)<br>(J/K) | V     | = | 0.96  | (cc)   | Cp   | =  | 4.19  | (J/K)  |       |
|           | chromite<br>0                                | hercynite<br>-4.93        | magnetite<br>62.13                                   | spinel<br>16.05        | ulvospinel<br>26.75 |                           |                           |                |         |               |              |       |   |       |        |      |    |       |        |       |
| Viscosity | of                                           | the                       | System                                               | cannot                 | be                  | computed.                 |                           |                |         |               |              |       |   |       |        |      |    |       |        |       |
| System    | mass<br>G                                    | =<br>=                    | 99.49<br>-1584850.79<br>(J)                          | (gm)<br>(J)            | density<br>H        | =<br>=                    | 2.2<br>-1305187.27<br>(J) | (gm/cc)<br>(J) | S       | =             | 242.42       | (J/K) | V | =     | 45.17  | (cc) | Cp | =     | 126.97 | (J/K) |
| Oxygen    | delta<br>G                                   | moles<br>=                | =<br>-1122.93<br>(J)                                 | 0.00434112<br>(J)      | delta<br>H          | grams<br>=                | =<br>121.99<br>(J)        |                | S       | =             | 1.08         | (J/K) | V | =     | 416.38 | (cc) | Cp | =     | 0.15   | (J/K) |

\*\*\*\*\*\_\*\*\*\*\*

Model 828 Bokan

|            |                                           |                                                       |              |               |            |             |            |         |           |     |       |       |      |        |           |      |     |        |       |       |
|------------|-------------------------------------------|-------------------------------------------------------|--------------|---------------|------------|-------------|------------|---------|-----------|-----|-------|-------|------|--------|-----------|------|-----|--------|-------|-------|
| Temp (oC)  | =                                         | 875.47                                                |              |               |            |             |            |         |           |     |       |       |      |        |           |      |     |        |       |       |
| Constraint | Flags:                                    | fO2                                                   | path         | =             | QFM        | Fractionate | Solids     |         |           |     |       |       |      |        |           |      |     |        |       |       |
| Liquid     | mass                                      | =                                                     | 35.98        | (gm)          | density    | =           | 2.24       | (gm/cc) | viscosity | =   | 5.2   | (log  | 10   | poise) | (analysis | in   | wt  | %)     |       |       |
|            | G                                         | =                                                     | -585759.34   | (J)           | H          | =           | -477067.64 | (J)     | S         | =   | 94.63 | (J/K) | V    | =      | 16.03     | (cc) | Cp  | =      | 49.36 | (J/K) |
|            | SiO2                                      | TiO2                                                  | Al2O3        | Fe2O3         | Cr2O3      | FeO         | MnO        | MgO     | NiO       | CoO | CaO   | Na2O  | K2O  | P2O5   | H2O       | CO2  | SO3 | Cl2O-1 | F2O-1 |       |
|            | 67.25                                     | 0.14                                                  | 13.6         | 0.72          | 0          | 2.49        | 0.61       | 0.43    | 0         | 0   | 2.76  | 4.34  | 3.19 | 0.58   | 3.87      | 0    | 0   | 0      | 0     |       |
| opx        | mass                                      | =                                                     | 0.08         | (gm)          | density    | =           | 3.52       | (gm/cc) | (analysis | in  | mole  | %)    |      |        |           |      |     |        |       |       |
|            | opx                                       | Na0.00Ca0.03Fe"0.96Mg0.95Fe""0.02Ti0.00Al0.09Si1.94O6 |              |               |            |             |            |         |           |     |       |       |      |        |           |      |     |        |       |       |
|            | G                                         | =                                                     | -1058.85     | (J)           | H          | =           | -871.6     | (J)     | S         | =   | 0.16  | (J/K) | V    | =      | 0.02      | (cc) | Cp  | =      | 0.09  | (J/K) |
|            | diopside                                  | clinoenstatit                                         | hedenbergite | alumino-buffo | buffonite  | essenite    | jadeite    |         |           |     |       |       |      |        |           |      |     |        |       |       |
|            | -98.1                                     | 96.55                                                 | 95.62        | 3.44          | -3.36      | 5.73        | 0.13       |         |           |     |       |       |      |        |           |      |     |        |       |       |
| feldspar   | mass                                      | =                                                     | 0.64         | (gm)          | density    | =           | 2.61       | (gm/cc) | (analysis | in  | mole  | %)    |      |        |           |      |     |        |       |       |
|            | K0.03Na0.60Ca0.37Al1.37Si2.63O8           |                                                       |              |               |            |             |            |         |           |     |       |       |      |        |           |      |     |        |       |       |
|            | G                                         | =                                                     | -10685.35    | (J)           | H          | =           | -9051.37   | (J)     | S         | =   | 1.42  | (J/K) | V    | =      | 0.25      | (cc) | Cp  | =      | 0.78  | (J/K) |
|            | albite                                    | anorthite                                             | sanidine     |               |            |             |            |         |           |     |       |       |      |        |           |      |     |        |       |       |
|            | 60.27                                     | 37.22                                                 | 2.51         |               |            |             |            |         |           |     |       |       |      |        |           |      |     |        |       |       |
| spinel     | mass                                      | =                                                     | 0.06         | (gm)          | density    | =           | 4.89       | (gm/cc) | (analysis | in  | mole  | %)    |      |        |           |      |     |        |       |       |
|            | Fe"1.10Mg0.08Fe""1.49Al0.15Cr0.00Ti0.18O4 |                                                       |              |               |            |             |            |         |           |     |       |       |      |        |           |      |     |        |       |       |
|            | G                                         | =                                                     | -437.05      | (J)           | H          | =           | -303.49    | (J)     | S         | =   | 0.12  | (J/K) | V    | =      | 0.01      | (cc) | Cp  | =      | 0.06  | (J/K) |
|            | chromite                                  | hercynite                                             | magnetite    | spinel        | ulvospinel |             |            |         |           |     |       |       |      |        |           |      |     |        |       |       |
|            | 0                                         | 0.02                                                  | 74.33        | 7.6           | 18.05      |             |            |         |           |     |       |       |      |        |           |      |     |        |       |       |
| water      | mass                                      | =                                                     | 1.61         | (gm)          | density    | =           | 0.21       | (gm/cc) |           |     |       |       |      |        |           |      |     |        |       |       |
|            | H2O                                       | =                                                     | -37322.25    | (J)           | H          | =           | -19285.05  | (J)     | S         | =   | 15.7  | (J/K) | V    | =      | 7.82      | (cc) | Cp  | =      | 5.34  | (J/K) |
| Total      | solids                                    | mass                                                  | =            | 2.39          | (gm)       | density     | =          | 0.3     | (gm/cc)   |     |       |       |      |        |           |      |     |        |       |       |
|            | G                                         | =                                                     | -49503.51    | (J)           | H          | =           | -29511.51  | (J)     | S         | =   | 17.41 | (J/K) | V    | =      | 8.1       | (cc) | Cp  | =      | 6.26  | (J/K) |
| Summary    | of                                        | all                                                   | fractionated | phases:       | (total     | mass        | =          | 61.12   | grams)    |     |       |       |      |        |           |      |     |        |       |       |
| opx        | mass                                      | =                                                     | 6.08         | (gm)          | density    | =           | 3.43       | (gm/cc) | (analysis | in  | mole  | %)    |      |        |           |      |     |        |       |       |
|            | opx                                       | Na0.00Ca0.06Fe"0.71Mg1.17Fe""0.02Ti0.00Al0.10Si1.94O6 |              |               |            |             |            |         |           |     |       |       |      |        |           |      |     |        |       |       |
|            | G                                         | =                                                     | -85831.93    | (J)           | H          | =           | -71292.25  | (J)     | S         | =   | 12.66 | (J/K) | V    | =      | 1.77      | (cc) | Cp  | =      | 7.1   | (J/K) |
|            | diopside                                  | clinoenstatit                                         | hedenbergite | alumino-buffo | buffonite  | essenite    | jadeite    |         |           |     |       |       |      |        |           |      |     |        |       |       |
|            | -71.13                                    | 93.9                                                  | 70.74        | 3.98          | -3.72      | 6.1         | 0.13       |         |           |     |       |       |      |        |           |      |     |        |       |       |
| cpx        | mass                                      | =                                                     | 7.44         | (gm)          | density    | =           | 3.31       | (gm/cc) | (analysis | in  | mole  | %)    |      |        |           |      |     |        |       |       |
|            | cpx                                       | Na0.01Ca0.83Fe"0.24Mg0.75Fe""0.06Ti0.03Al0.24Si1.83O6 |              |               |            |             |            |         |           |     |       |       |      |        |           |      |     |        |       |       |
|            | G                                         | =                                                     | -113063.66   | (J)           | H          | =           | -95517.07  | (J)     | S         | =   | 15.28 | (J/K) | V    | =      | 2.25      | (cc) | Cp  | =      | 8.46  | (J/K) |
|            | diopside                                  | clinoenstatit                                         | hedenbergite | alumino-buffo | buffonite  | essenite    | jadeite    |         |           |     |       |       |      |        |           |      |     |        |       |       |
|            | 41.95                                     | 15.49                                                 | 24.27        | 10.61         | -5.51      | 11.75       | 1.43       |         |           |     |       |       |      |        |           |      |     |        |       |       |
| feldspar   | mass                                      | =                                                     | 42.95        | (gm)          | density    | =           | 2.67       | (gm/cc) | (analysis | in  | mole  | %)    |      |        |           |      |     |        |       |       |
|            | K0.01Na0.31Ca0.69Al1.69Si2.31O8           |                                                       |              |               |            |             |            |         |           |     |       |       |      |        |           |      |     |        |       |       |
|            | G                                         | =                                                     | -713952.4    | (J)           | H          | =           | -607327.58 | (J)     | S         | =   | 92.83 | (J/K) | V    | =      | 16.07     | (cc) | Cp  | =      | 51.35 | (J/K) |
|            | albite                                    | anorthite                                             | sanidine     |               |            |             |            |         |           |     |       |       |      |        |           |      |     |        |       |       |
|            | 30.56                                     | 68.63                                                 | 0.8          |               |            |             |            |         |           |     |       |       |      |        |           |      |     |        |       |       |
| spinel     | mass                                      | =                                                     | 4.66         | (gm)          | density    | =           | 4.78       | (gm/cc) | (analysis | in  | mole  | %)    |      |        |           |      |     |        |       |       |
|            | Fe"1.11Mg0.16Fe""1.25Al0.22Cr0.00Ti0.27O4 |                                                       |              |               |            |             |            |         |           |     |       |       |      |        |           |      |     |        |       |       |
|            | G                                         | =                                                     | -35563.15    | (J)           | H          | =           | -25320.44  | (J)     | S         | =   | 8.92  | (J/K) | V    | =      | 0.97      | (cc) | Cp  | =      | 4.24  | (J/K) |
|            | chromite                                  | hercynite                                             | magnetite    | spinel        | ulvospinel |             |            |         |           |     |       |       |      |        |           |      |     |        |       |       |
|            | 0                                         | -4.87                                                 | 62.29        | 15.94         | 26.64      |             |            |         |           |     |       |       |      |        |           |      |     |        |       |       |
| Viscosity  | of                                        | the                                                   | System       | cannot        | be         | computed.   |            |         |           |     |       |       |      |        |           |      |     |        |       |       |

|                 |                                                   |               |                                                               |                   |              |              |                    |                 |                |         |               |               |         |        |                 |                   |           |           |             |            |
|-----------------|---------------------------------------------------|---------------|---------------------------------------------------------------|-------------------|--------------|--------------|--------------------|-----------------|----------------|---------|---------------|---------------|---------|--------|-----------------|-------------------|-----------|-----------|-------------|------------|
| System          | mass<br>G                                         | =<br>=        | 99.49<br>-1583674                                             | (gm)<br>(J)       | density<br>H | =<br>=       | 2.2<br>-1306036.49 | (gm/cc)<br>(J)  | S              | =       | 241.71        | (J/K)         | V       | =      | 45.2            | (cc)              | Cp        | =         | 126.78      | (J/K)      |
| Oxygen          | delta<br>G                                        | moles<br>=    | =<br>-1131.95                                                 | 0.00439712<br>(J) | delta<br>H   | grams<br>=   | =<br>122.78        | 0.140702<br>(J) | S              | =       | 1.09          | (J/K)         | V       | =      | 419.92          | (cc)              | Cp        | =         | 0.16        | (J/K)      |
| *****-----***** |                                                   |               |                                                               |                   |              |              |                    |                 |                |         |               |               |         |        |                 |                   |           |           |             |            |
| Model 828 Bokan |                                                   |               |                                                               |                   |              |              |                    |                 |                |         |               |               |         |        |                 |                   |           |           |             |            |
| Temp (oC)       | =                                                 | 870.47        |                                                               |                   |              |              |                    |                 |                |         |               |               |         |        |                 |                   |           |           |             |            |
| Constraint      | Flags:                                            | fO2           | path                                                          | =                 | QFM          | Fractionate  | Solids             |                 |                |         |               |               |         |        |                 |                   |           |           |             |            |
| Liquid          | mass<br>G                                         | =<br>=        | 35.2<br>-572935.3                                             | (gm)<br>(J)       | density<br>H | =<br>=       | 2.24<br>-467344.74 | (gm/cc)<br>(J)  | viscosity<br>S | =<br>=  | 5.26<br>92.33 | (log<br>(J/K) | 10<br>V | =<br>= | poise)<br>15.69 | (analysis<br>(cc) | in<br>CO2 | wt<br>SO3 | %<br>Cl2O-1 | =<br>F2O-1 |
|                 | SiO2                                              | TiO2          | Al2O3                                                         | Fe2O3             | Cr2O3        | FeO          | MnO                | MgO             | NiO            | CoO     | CaO           | Na2O          | K2O     | P2O5   | H2O             | CO2               | SO3       | Cl2O-1    | F2O-1       |            |
|                 | 67.59                                             | 0.13          | 13.44                                                         | 0.7               | 0            | 2.39         | 0.62               | 0.41            | 0              | 0       | 2.69          | 4.31          | 3.25    | 0.6    | 3.87            | 0                 | 0         | 0         | 0           |            |
| opx             | mass<br>opx<br>G                                  | =<br>=        | 0.07<br>Na0.00Ca0.03Fe"0.97Mg0.94Fe""0.02Ti0.00Al0.09Si1.94O6 | (gm)<br>(J)       | density<br>H | =<br>=       | 3.53<br>-811.82    | (gm/cc)<br>(J)  | (analysis<br>S | in<br>= | mole<br>0.15  | %<br>(J/K)    |         |        |                 |                   |           |           |             |            |
|                 | diopside                                          | clinoenstatit | hedenbergite                                                  | alumno-buffo      | buffonite    | essenite     | jadeite            |                 |                |         |               |               |         |        |                 |                   |           |           |             |            |
|                 | -99.74                                            | 96.7          | 97.12                                                         | 3.41              | -3.34        | 5.71         | 0.13               |                 |                |         |               |               |         |        |                 |                   |           |           |             |            |
| feldspar        | mass<br>K0.03Na0.61Ca0.36Al1.36Si2.64O8           | =<br>=        | 0.62<br>-10354.35                                             | (gm)<br>(J)       | density<br>H | =<br>=       | 2.61<br>-8779.08   | (gm/cc)<br>(J)  | (analysis<br>S | in<br>= | mole<br>1.38  | %<br>(J/K)    | V       | =      | 0.24            | (cc)              | Cp        | =         | 0.75        | (J/K)      |
|                 | albite                                            | anorthite     | sanidine                                                      |                   |              |              |                    |                 |                |         |               |               |         |        |                 |                   |           |           |             |            |
|                 | 61.48                                             | 35.86         | 2.66                                                          |                   |              |              |                    |                 |                |         |               |               |         |        |                 |                   |           |           |             |            |
| spinel          | mass<br>Fe"1.10Mg0.07Fe""1.50Al0.15Cr0.00Ti0.18O4 | =<br>=        | 0.06<br>-407.71                                               | (gm)<br>(J)       | density<br>H | =<br>=       | 4.89<br>-283.44    | (gm/cc)<br>(J)  | (analysis<br>S | in<br>= | mole<br>0.11  | %<br>(J/K)    | V       | =      | 0.01            | (cc)              | Cp        | =         | 0.05        | (J/K)      |
|                 | chromite                                          | hercynite     | magnetite                                                     | spinel            | ulvospinel   |              |                    |                 |                |         |               |               |         |        |                 |                   |           |           |             |            |
|                 | 0                                                 | 0.14          | 74.88                                                         | 7.32              | 17.67        |              |                    |                 |                |         |               |               |         |        |                 |                   |           |           |             |            |
| water           | mass<br>H2O<br>G                                  | =<br>=        | 1.64<br>-37967.51                                             | (gm)<br>(J)       | density<br>H | =<br>=       | 0.21<br>-19687.07  | (gm/cc)<br>(J)  |                |         |               |               |         |        |                 |                   |           |           |             |            |
|                 |                                                   |               |                                                               |                   |              |              |                    | S               | =              | 15.99   | (J/K)         | V             | =       | 7.92   | (cc)            | Cp                | =         | 5.46      | (J/K)       |            |
| Total           | solids<br>G                                       | mass<br>=     | =<br>-49715.08                                                | 2.39<br>(J)       | (gm)<br>H    | density<br>= | =<br>-29561.41     | 0.29<br>(J)     | (gm/cc)<br>S   | =       | 17.62         | (J/K)         | V       | =      | 8.19            | (cc)              | Cp        | =         | 6.35        | (J/K)      |
| Summary         | of                                                | all           | fractionated                                                  | phases:           | (total       | mass         | =                  | 61.9            | grams)         |         |               |               |         |        |                 |                   |           |           |             |            |
| opx             | mass<br>opx<br>G                                  | =<br>=        | 6.15<br>Na0.00Ca0.06Fe"0.71Mg1.17Fe""0.02Ti0.00Al0.10Si1.94O6 | (gm)<br>(J)       | density<br>H | =<br>=       | 3.43<br>-72174.3   | (gm/cc)<br>(J)  | (analysis<br>S | in<br>= | mole<br>12.79 | %<br>(J/K)    | V       | =      | 1.79            | (cc)              | Cp        | =         | 7.19        | (J/K)      |
|                 | diopside                                          | clinoenstatit | hedenbergite                                                  | alumno-buffo      | buffonite    | essenite     | jadeite            |                 |                |         |               |               |         |        |                 |                   |           |           |             |            |
|                 | -71.46                                            | 93.93         | 71.04                                                         | 3.97              | -3.72        | 6.1          | 0.13               |                 |                |         |               |               |         |        |                 |                   |           |           |             |            |
| cpx             | mass<br>cpx<br>G                                  | =<br>=        | 7.44<br>Na0.01Ca0.83Fe"0.24Mg0.75Fe""0.06Ti0.03Al0.24Si1.83O6 | (gm)<br>(J)       | density<br>H | =<br>=       | 3.31<br>-95559.35  | (gm/cc)<br>(J)  | (analysis<br>S | in<br>= | mole<br>15.24 | %<br>(J/K)    | V       | =      | 2.25            | (cc)              | Cp        | =         | 8.45        | (J/K)      |
|                 | diopside                                          | clinoenstatit | hedenbergite                                                  | alumno-buffo      | buffonite    | essenite     | jadeite            |                 |                |         |               |               |         |        |                 |                   |           |           |             |            |
|                 | 41.95                                             | 15.49         | 24.27                                                         | 10.61             | -5.51        | 11.75        | 1.43               |                 |                |         |               |               |         |        |                 |                   |           |           |             |            |
| feldspar        | mass<br>K0.01Na0.31Ca0.68Al1.68Si2.32O8           | =<br>=        | 43.59<br>-724125.59                                           | (gm)<br>(J)       | density<br>H | =<br>=       | 2.67<br>-616600.28 | (gm/cc)<br>(J)  | (analysis<br>S | in<br>= | mole<br>94.02 | %<br>(J/K)    | V       | =      | 16.32           | (cc)              | Cp        | =         | 52.1        | (J/K)      |
|                 | albite                                            | anorthite     | sanidine                                                      |                   |              |              |                    |                 |                |         |               |               |         |        |                 |                   |           |           |             |            |
|                 | 31.01                                             | 68.16         | 0.83                                                          |                   |              |              |                    |                 |                |         |               |               |         |        |                 |                   |           |           |             |            |





[illegible]

|                 |                                              |                           |                                                |                                          |                     |                   |                       |                    |                |          |               |               |            |              |                 |                  |           |           |               |       |
|-----------------|----------------------------------------------|---------------------------|------------------------------------------------|------------------------------------------|---------------------|-------------------|-----------------------|--------------------|----------------|----------|---------------|---------------|------------|--------------|-----------------|------------------|-----------|-----------|---------------|-------|
| water           | mass<br>H2O<br>G                             | =<br><br>=                | 1.73<br><br>-39765.18                          | (gm)<br><br>(J)                          | density<br><br>H    | =<br><br>=        | 0.21<br><br>-20836.82 | (gm/cc)<br><br>(J) | S              | =        | 16.77         | (J/K)         | V          | =            | 8.16            | (cc)             | Cp        | =         | 5.83          | (J/K) |
| Total           | solids<br>G                                  | mass<br>=<br>=            | =<br>-50323.56                                 | 2.4<br>(J)                               | (gm)<br>H           | density<br>=<br>= | =<br>-29743.77        | 0.29<br>(J)        | (gm/cc)<br>S   | =        | 18.24         | (J/K)         | V          | =            | 8.41            | (cc)             | Cp        | =         | 6.63          | (J/K) |
| Summary         | of                                           | all                       | fractionated                                   | phases:                                  | (total              | mass              | =                     | 64.06              | grams)         |          |               |               |            |              |                 |                  |           |           |               |       |
| opx             | mass<br>opx<br>G                             | =<br>Na0.00Ca0.06Fe"<br>= | 6.35<br>"0.72Mg1.16Fe"<br>-89268.22            | (gm)<br>"0.02Ti0.00Al0.10Si1.94O6<br>(J) | density<br>H        | =<br>=            | 3.43<br>-74482.83     | (gm/cc)<br>(J)     | (analysis<br>S | in<br>=  | mole<br>13.1  | (%)<br>(J/K)  | V          | =            | 1.85            | (cc)             | Cp        | =         | 7.41          | (J/K) |
|                 | diopside<br>-72.37                           | clinoenstatit<br>94.02    | hedenbergite<br>71.88                          | alumno-buffo<br>3.96                     | buffonite<br>-3.71  | essenite<br>6.09  | jadeite<br>0.13       |                    |                |          |               |               |            |              |                 |                  |           |           |               |       |
| cpx             | mass<br>cpx<br>G                             | =<br>Na0.01Ca0.83Fe"<br>= | 7.44<br>"0.24Mg0.75Fe"<br>-112759.61           | (gm)<br>"0.06Ti0.03Al0.24Si1.83O6<br>(J) | density<br>H        | =<br>=            | 3.32<br>-95686.07     | (gm/cc)<br>(J)     | (analysis<br>S | in<br>=  | mole<br>15.13 | (%)<br>(J/K)  | V          | =            | 2.24            | (cc)             | Cp        | =         | 8.44          | (J/K) |
|                 | diopside<br>41.95                            | clinoenstatit<br>15.49    | hedenbergite<br>24.27                          | alumno-buffo<br>10.61                    | buffonite<br>-5.51  | essenite<br>11.75 | jadeite<br>1.43       |                    |                |          |               |               |            |              |                 |                  |           |           |               |       |
| feldspar        | mass<br>K0.01Na0.32Ca0.67Al1.67Si2.33O8<br>G | =<br>=                    | 45.4<br>-752672.98                             | (gm)<br>(J)                              | density<br>H        | =<br>=            | 2.67<br>-642843.39    | (gm/cc)<br>(J)     | (analysis<br>S | in<br>=  | mole<br>97.31 | (%)<br>(J/K)  | V          | =            | 17.01           | (cc)             | Cp        | =         | 54.19         | (J/K) |
|                 | albite<br>32.29                              | anorthite<br>66.8         | sanidine<br>0.91                               |                                          |                     |                   |                       |                    |                |          |               |               |            |              |                 |                  |           |           |               |       |
| spinel          | mass<br>Fe"1.11Mg0.16Fe"<br>G                | =<br>=                    | 4.87<br>"1.26Al0.22Cr0.00Ti0.26O4<br>-36898.27 | (gm)<br>(J)                              | density<br>H        | =<br>=            | 4.79<br>-26463        | (gm/cc)<br>(J)     | (analysis<br>S | in<br>=  | mole<br>9.25  | (%)<br>(J/K)  | V          | =            | 1.02            | (cc)             | Cp        | =         | 4.43          | (J/K) |
|                 | chromite<br>0                                | hercynite<br>-4.65        | magnetite<br>62.84                             | spinel<br>15.56                          | ulvospinel<br>26.24 |                   |                       |                    |                |          |               |               |            |              |                 |                  |           |           |               |       |
| Viscosity       | of                                           | the                       | System                                         | cannot                                   | be                  | computed.         |                       |                    |                |          |               |               |            |              |                 |                  |           |           |               |       |
| System          | mass<br>G                                    | =<br>=                    | 99.49<br>-1578983.7                            | (gm)<br>(J)                              | density<br>H        | =<br>=            | 2.2<br>-1309326.99    | (gm/cc)<br>(J)     | S              | =        | 238.93        | (J/K)         | V          | =            | 45.28           | (cc)             | Cp        | =         | 126.13        | (J/K) |
| Oxygen          | delta<br>G                                   | moles<br>=                | =<br>-1157.89                                  | 0.00458628<br>(J)                        | delta<br>H          | grams<br>=        | =<br>124.82           | 0.146755<br>(J)    | S              | =        | 1.14          | (J/K)         | V          | =            | 430.36          | (cc)             | Cp        | =         | 0.16          | (J/K) |
| *****_*****     |                                              |                           |                                                |                                          |                     |                   |                       |                    |                |          |               |               |            |              |                 |                  |           |           |               |       |
| Model 828 Bokan |                                              |                           |                                                |                                          |                     |                   |                       |                    |                |          |               |               |            |              |                 |                  |           |           |               |       |
| Temp (oC)       | =                                            | 850.47                    |                                                |                                          |                     |                   |                       |                    |                |          |               |               |            |              |                 |                  |           |           |               |       |
| Constraint      | Flags:                                       | fO2                       | path                                           | =                                        | QFM                 | Fractionate       | Solids                |                    |                |          |               |               |            |              |                 |                  |           |           |               |       |
| Liquid          | mass<br>G                                    | =<br>=                    | 32.35<br>-525910.47                            | (gm)<br>(J)                              | density<br>H        | =<br>=            | 2.24<br>-431630.39    | (gm/cc)<br>(J)     | viscosity<br>S | =<br>=   | 5.52<br>83.91 | (log<br>(J/K) | 10<br>V    | =<br>=       | poise)<br>14.46 | (analysis<br>H2O | in<br>CO2 | wt<br>SO3 | (%)<br>Cl2O-1 |       |
|                 | SiO2<br>68.89                                | TiO2<br>0.11              | Al2O3<br>12.79                                 | Fe2O3<br>0.61                            | Cr2O3<br>0          | FeO<br>2          | MnO<br>0.68           | MgO<br>0.32        | NiO<br>0       | CoO<br>0 | CaO<br>2.43   | Na2O<br>4.16  | K2O<br>3.5 | P2O5<br>0.65 | H2O<br>3.85     |                  |           |           |               |       |
| opx             | mass<br>opx<br>G                             | =<br>Na0.00Ca0.03Fe"<br>= | 0.06<br>"1.03Mg0.88Fe"<br>-745.61              | (gm)<br>"0.02Ti0.00Al0.09Si1.94O6<br>(J) | density<br>H        | =<br>=            | 3.55<br>-616.05       | (gm/cc)<br>(J)     | (analysis<br>S | in<br>=  | mole<br>0.12  | (%)<br>(J/K)  | V          | =            | 0.02            | (cc)             | Cp        | =         | 0.06          | (J/K) |
|                 | diopside<br>-106.13                          | clinoenstatit<br>97.25    | hedenbergite<br>103.08                         | alumno-buffo<br>3.3                      | buffonite<br>-3.24  | essenite<br>5.62  | jadeite<br>0.12       |                    |                |          |               |               |            |              |                 |                  |           |           |               |       |
| feldspar        | mass<br>K0.03Na0.66Ca0.31Al1.31Si2.69O8      | =                         | 0.55                                           | (gm)                                     | density             | =                 | 2.6                   | (gm/cc)            | (analysis      | in       | mole          | (%)           |            |              |                 |                  |           |           |               |       |

|                 |                                               |                                                        |                               |                         |                    |             |             |              |           |    |        |            |            |             |                |            |          |            |              |       |
|-----------------|-----------------------------------------------|--------------------------------------------------------|-------------------------------|-------------------------|--------------------|-------------|-------------|--------------|-----------|----|--------|------------|------------|-------------|----------------|------------|----------|------------|--------------|-------|
|                 | G albite 65.91                                | = anorthite 30.71                                      | -9139.49 sanidine 3.38        | (J)                     | H                  | =           | -7778.01    | (J)          | S         | =  | 1.21   | (J/K)      | V          | =           | 0.21           | (cc)       | Cp       | =          | 0.67         | (J/K) |
| spinel          | mass Fe"1.10Mg0.06Fe"1.54Al0.14Cr0.00Ti0.16O4 | =                                                      | 0.04                          | (gm)                    | density            | =           | 4.91        | (gm/cc)      | (analysis | in | mole   | %)         |            |             |                |            |          |            |              |       |
|                 | G chromite 0                                  | = hercynite 0.53                                       | -309.16 magnetite 76.89       | (J) spinel 6.3          | H ulvospinel 16.28 | =           | -216.01     | (J)          | S         | =  | 0.08   | (J/K)      | V          | =           | 0.01           | (cc)       | Cp       | =          | 0.04         | (J/K) |
| water           | mass H2O                                      | =                                                      | 1.75                          | (gm)                    | density            | =           | 0.21        | (gm/cc)      |           |    |        |            |            |             |                |            |          |            |              |       |
|                 | G                                             | =                                                      | -40320.74                     | (J)                     | H                  | =           | -21202.22   | (J)          | S         | =  | 17.02  | (J/K)      | V          | =           | 8.23           | (cc)       | Cp       | =          | 5.94         | (J/K) |
| Total           | solids G                                      | mass =                                                 | -50515                        | 2.41 (J)                | (gm) H             | density =   | -29812.29   | 0.28 (J)     | (gm/cc) S | =  | 18.43  | (J/K)      | V          | =           | 8.47           | (cc)       | Cp       | =          | 6.72         | (J/K) |
| Summary         | of                                            | all                                                    | fractionated                  | phases:                 | (total             | mass        | =           | 64.73        | grams)    |    |        |            |            |             |                |            |          |            |              |       |
| opx             | mass opx G                                    | = Na0.00Ca0.06Fe"0.72Mg1.16Fe"0.02Ti0.00Al0.10Si1.94O6 | 6.41                          | (gm)                    | density            | =           | 3.44        | (gm/cc)      | (analysis | in | mole   | %)         |            |             |                |            |          |            |              |       |
|                 | diopside -72.66                               | = clinoenstatit 94.05                                  | -89970.25 hedenbergite 72.14  | (J) alumino-buffo 3.95  | H buffonite -3.7   | =           | -75154.13   | (J)          | S         | =  | 13.19  | (J/K)      | V          | =           | 1.87           | (cc)       | Cp       | =          | 7.47         | (J/K) |
|                 |                                               |                                                        |                               |                         |                    |             | 6.08        |              |           |    |        | 0.13       |            |             |                |            |          |            |              |       |
| cpx             | mass cpx G                                    | = Na0.01Ca0.83Fe"0.24Mg0.75Fe"0.06Ti0.03Al0.24Si1.83O6 | 7.44                          | (gm)                    | density            | =           | 3.32        | (gm/cc)      | (analysis | in | mole   | %)         |            |             |                |            |          |            |              |       |
|                 | diopside 41.95                                | = clinoenstatit 15.49                                  | -112684.07 hedenbergite 24.27 | (J) alumino-buffo 10.61 | H buffonite -5.51  | =           | -95728.26   | (J)          | S         | =  | 15.09  | (J/K)      | V          | =           | 2.24           | (cc)       | Cp       | =          | 8.44         | (J/K) |
|                 |                                               |                                                        |                               |                         |                    |             | 11.75       |              |           |    |        | 1.43       |            |             |                |            |          |            |              |       |
| feldspar        | mass K0.01Na0.33Ca0.66Al1.66Si2.34O8          | =                                                      | 45.96                         | (gm)                    | density            | =           | 2.67        | (gm/cc)      | (analysis | in | mole   | %)         |            |             |                |            |          |            |              |       |
|                 | G albite 32.7                                 | = anorthite 66.36                                      | -761568.43 sanidine 0.94      | (J)                     | H                  | =           | -651095.04  | (J)          | S         | =  | 98.32  | (J/K)      | V          | =           | 17.22          | (cc)       | Cp       | =          | 54.84        | (J/K) |
| spinel          | mass Fe"1.11Mg0.15Fe"1.26Al0.22Cr0.00Ti0.26O4 | =                                                      | 4.92                          | (gm)                    | density            | =           | 4.79        | (gm/cc)      | (analysis | in | mole   | %)         |            |             |                |            |          |            |              |       |
|                 | G chromite 0                                  | = hercynite -4.6                                       | -37167.52 magnetite 62.97     | (J) spinel 15.48        | H ulvospinel 26.16 | =           | -26705.61   | (J)          | S         | =  | 9.31   | (J/K)      | V          | =           | 1.03           | (cc)       | Cp       | =          | 4.47         | (J/K) |
| Viscosity       | of                                            | the                                                    | System                        | cannot                  | be                 | computed.   |             |              |           |    |        |            |            |             |                |            |          |            |              |       |
| System          | mass G                                        | =                                                      | 99.5                          | (gm)                    | density            | =           | 2.2         | (gm/cc)      |           |    |        |            |            |             |                |            |          |            |              |       |
|                 |                                               | =                                                      | -1577815.73                   | (J)                     | H                  | =           | -1310125.72 | (J)          | S         | =  | 238.24 | (J/K)      | V          | =           | 45.28          | (cc)       | Cp       | =          | 125.99       | (J/K) |
| Oxygen          | delta G                                       | moles =                                                | -1162.14                      | 0.00462583 (J)          | delta H            | grams =     | 125.08      | 0.148021 (J) | S         | =  | 1.15   | (J/K)      | V          | =           | 432.15         | (cc)       | Cp       | =          | 0.16         | (J/K) |
| *****-----***** |                                               |                                                        |                               |                         |                    |             |             |              |           |    |        |            |            |             |                |            |          |            |              |       |
| Model 828 Bokan |                                               |                                                        |                               |                         |                    |             |             |              |           |    |        |            |            |             |                |            |          |            |              |       |
| Temp (oC)       | =                                             | 845.47                                                 |                               |                         |                    |             |             |              |           |    |        |            |            |             |                |            |          |            |              |       |
| Constraint      | Flags:                                        | fO2                                                    | path                          | =                       | QFM                | Fractionate | Solids      |              |           |    |        |            |            |             |                |            |          |            |              |       |
| Liquid          | mass G                                        | =                                                      | 31.7                          | (gm)                    | density            | =           | 2.24        | (gm/cc)      | viscosity | =  | 5.59   | (log (J/K) | 10 V       | poise)      | (analysis      | in         | wt       | %)         |              |       |
|                 | SiO2 69.2                                     | = TiO2 0.11                                            | -515137.79 Al2O3 12.63        | (J) Fe2O3 0.59          | H Cr2O3 0          | =           | -423434.83  | (J) MnO 0.69 | S NiO 0   | =  | 81.98  | (J/K)      | V K2O 3.56 | = P2O5 0.66 | 14.17 H2O 3.85 | (cc) CO2 0 | Cp SO3 0 | = Cl2O-1 0 | 43.1 F2O-1 0 | (J/K) |



|           |                                          |       |                                                      |               |           |           |             |          |           |    |        |       |   |   |        |      |    |   |        |       |
|-----------|------------------------------------------|-------|------------------------------------------------------|---------------|-----------|-----------|-------------|----------|-----------|----|--------|-------|---|---|--------|------|----|---|--------|-------|
| opx       | mass                                     | =     | 0.05                                                 | (gm)          | density   | =         | 3.56        | (gm/cc)  | (analysis | in | mole   | %)    |   |   |        |      |    |   |        |       |
|           | opx                                      |       | Na0.00Ca0.02Fe"1.05Mg0.87Fe"0.02Ti0.00Al0.09Si1.94O6 |               |           |           |             |          |           |    |        |       |   |   |        |      |    |   |        |       |
|           | G                                        | =     | -696.7                                               | (J)           | H         | =         | -576.09     | (J)      | S         | =  | 0.11   | (J/K) | V | = | 0.02   | (cc) | Cp | = | 0.06   | (J/K) |
|           | diopside                                 |       | hedenbergite                                         | alumino-buffo | buffonite |           | essenite    | jadeite  |           |    |        |       |   |   |        |      |    |   |        |       |
|           | -107.69                                  |       | 97.38                                                | 104.55        | 3.26      |           | -3.21       | 5.59     | 0.12      |    |        |       |   |   |        |      |    |   |        |       |
| feldspar  | mass                                     | =     | 0.54                                                 | (gm)          | density   | =         | 2.6         | (gm/cc)  | (analysis | in | mole   | %)    |   |   |        |      |    |   |        |       |
|           | K0.04Na0.67Ca0.30Al1.30Si2.70O8          |       |                                                      |               |           |           |             |          |           |    |        |       |   |   |        |      |    |   |        |       |
|           | G                                        | =     | -8858.91                                             | (J)           | H         | =         | -7546.35    | (J)      | S         | =  | 1.17   | (J/K) | V | = | 0.21   | (cc) | Cp | = | 0.65   | (J/K) |
|           | albite                                   |       | anorthite                                            | sanidine      |           |           |             |          |           |    |        |       |   |   |        |      |    |   |        |       |
|           | 66.91                                    |       | 29.51                                                | 3.58          |           |           |             |          |           |    |        |       |   |   |        |      |    |   |        |       |
| spinel    | mass                                     | =     | 0.04                                                 | (gm)          | density   | =         | 4.91        | (gm/cc)  | (analysis | in | mole   | %)    |   |   |        |      |    |   |        |       |
|           | Fe"1.10Mg0.06Fe"1.55Al0.13Cr0.00Ti0.16O4 |       |                                                      |               |           |           |             |          |           |    |        |       |   |   |        |      |    |   |        |       |
|           | G                                        | =     | -288.56                                              | (J)           | H         | =         | -201.89     | (J)      | S         | =  | 0.08   | (J/K) | V | = | 0.01   | (cc) | Cp | = | 0.04   | (J/K) |
|           | chromite                                 |       | hercynite                                            | magnetite     | spinel    |           | ulvospinel  |          |           |    |        |       |   |   |        |      |    |   |        |       |
|           | 0                                        |       | 0.61                                                 | 77.35         | 6.07      |           | 15.98       |          |           |    |        |       |   |   |        |      |    |   |        |       |
| water     | mass                                     | =     | 1.78                                                 | (gm)          | density   | =         | 0.21        | (gm/cc)  |           |    |        |       |   |   |        |      |    |   |        |       |
|           | H2O                                      |       |                                                      |               |           |           |             |          |           |    |        |       |   |   |        |      |    |   |        |       |
|           | G                                        | =     | -40855.54                                            | (J)           | H         | =         | -21559.08   | (J)      | S         | =  | 17.25  | (J/K) | V | = | 8.3    | (cc) | Cp | = | 6.06   | (J/K) |
| Total     | solids                                   | mass  | =                                                    | 2.41          | (gm)      | density   | =           | 0.28     | (gm/cc)   |    |        |       |   |   |        |      |    |   |        |       |
|           | G                                        | =     | -50699.72                                            | (J)           | H         | =         | -29883.4    | (J)      | S         | =  | 18.61  | (J/K) | V | = | 8.53   | (cc) | Cp | = | 6.81   | (J/K) |
| Summary   | of                                       | all   | fractionated                                         | phases:       | (total    | mass      | =           | 65.38    | grams)    |    |        |       |   |   |        |      |    |   |        |       |
| opx       | mass                                     | =     | 6.47                                                 | (gm)          | density   | =         | 3.44        | (gm/cc)  | (analysis | in | mole   | %)    |   |   |        |      |    |   |        |       |
|           | opx                                      |       | Na0.00Ca0.06Fe"0.72Mg1.15Fe"0.02Ti0.00Al0.10Si1.94O6 |               |           |           |             |          |           |    |        |       |   |   |        |      |    |   |        |       |
|           | G                                        | =     | -90619.05                                            | (J)           | H         | =         | -75782.53   | (J)      | S         | =  | 13.26  | (J/K) | V | = | 1.88   | (cc) | Cp | = | 7.53   | (J/K) |
|           | diopside                                 |       | hedenbergite                                         | alumino-buffo | buffonite |           | essenite    | jadeite  |           |    |        |       |   |   |        |      |    |   |        |       |
|           | -72.93                                   |       | 94.08                                                | 72.39         | 3.94      |           | -3.7        | 6.08     | 0.13      |    |        |       |   |   |        |      |    |   |        |       |
| cpx       | mass                                     | =     | 7.44                                                 | (gm)          | density   | =         | 3.32        | (gm/cc)  | (analysis | in | mole   | %)    |   |   |        |      |    |   |        |       |
|           | cpx                                      |       | Na0.01Ca0.83Fe"0.24Mg0.75Fe"0.06Ti0.03Al0.24Si1.83O6 |               |           |           |             |          |           |    |        |       |   |   |        |      |    |   |        |       |
|           | G                                        | =     | -112608.71                                           | (J)           | H         | =         | -95770.43   | (J)      | S         | =  | 15.05  | (J/K) | V | = | 2.24   | (cc) | Cp | = | 8.43   | (J/K) |
|           | diopside                                 |       | hedenbergite                                         | alumino-buffo | buffonite |           | essenite    | jadeite  |           |    |        |       |   |   |        |      |    |   |        |       |
|           | 41.95                                    |       | 15.49                                                | 24.27         | 10.61     |           | -5.51       | 11.75    | 1.43      |    |        |       |   |   |        |      |    |   |        |       |
| feldspar  | mass                                     | =     | 46.51                                                | (gm)          | density   | =         | 2.67        | (gm/cc)  | (analysis | in | mole   | %)    |   |   |        |      |    |   |        |       |
|           | K0.01Na0.33Ca0.66Al1.66Si2.34O8          |       |                                                      |               |           |           |             |          |           |    |        |       |   |   |        |      |    |   |        |       |
|           | G                                        | =     | -770170.05                                           | (J)           | H         | =         | -659111.36  | (J)      | S         | =  | 99.28  | (J/K) | V | = | 17.43  | (cc) | Cp | = | 55.48  | (J/K) |
|           | albite                                   |       | anorthite                                            | sanidine      |           |           |             |          |           |    |        |       |   |   |        |      |    |   |        |       |
|           | 33.1                                     |       | 65.93                                                | 0.97          |           |           |             |          |           |    |        |       |   |   |        |      |    |   |        |       |
| spinel    | mass                                     | =     | 4.96                                                 | (gm)          | density   | =         | 4.79        | (gm/cc)  | (analysis | in | mole   | %)    |   |   |        |      |    |   |        |       |
|           | Fe"1.11Mg0.15Fe"1.26Al0.22Cr0.00Ti0.26O4 |       |                                                      |               |           |           |             |          |           |    |        |       |   |   |        |      |    |   |        |       |
|           | G                                        | =     | -37414.43                                            | (J)           | H         | =         | -26933.3    | (J)      | S         | =  | 9.37   | (J/K) | V | = | 1.03   | (cc) | Cp | = | 4.51   | (J/K) |
|           | chromite                                 |       | hercynite                                            | magnetite     | spinel    |           | ulvospinel  |          |           |    |        |       |   |   |        |      |    |   |        |       |
|           | 0                                        |       | -4.56                                                | 63.08         | 15.4      |           | 26.07       |          |           |    |        |       |   |   |        |      |    |   |        |       |
| Viscosity | of                                       | the   | System                                               | cannot        | be        | computed. |             |          |           |    |        |       |   |   |        |      |    |   |        |       |
| System    | mass                                     | =     | 99.5                                                 | (gm)          | density   | =         | 2.2         | (gm/cc)  |           |    |        |       |   |   |        |      |    |   |        |       |
|           | G                                        | =     | -1576649.75                                          | (J)           | H         | =         | -1310915.86 | (J)      | S         | =  | 237.56 | (J/K) | V | = | 45.29  | (cc) | Cp | = | 125.85 | (J/K) |
| Oxygen    | delta                                    | moles | =                                                    | 0.00466264    | delta     | grams     | =           | 0.149199 |           |    |        |       |   |   |        |      |    |   |        |       |
|           | G                                        | =     | -1165.62                                             | (J)           | H         | =         | 125.25      | (J)      | S         | =  | 1.15   | (J/K) | V | = | 433.65 | (cc) | Cp | = | 0.16   | (J/K) |

\*\*\*\*\*-----\*\*\*\*\*

Model 828 Bokan

|            |                                            |                                                        |              |               |            |             |            |         |           |     |       |       |      |        |           |      |     |        |       |       |
|------------|--------------------------------------------|--------------------------------------------------------|--------------|---------------|------------|-------------|------------|---------|-----------|-----|-------|-------|------|--------|-----------|------|-----|--------|-------|-------|
| Temp (oC)  | =                                          | 840.47                                                 |              |               |            |             |            |         |           |     |       |       |      |        |           |      |     |        |       |       |
| Constraint | Flags:                                     | fO2                                                    | path         | =             | QFM        | Fractionate | Solids     |         |           |     |       |       |      |        |           |      |     |        |       |       |
| Liquid     | mass                                       | =                                                      | 31.08        | (gm)          | density    | =           | 2.24       | (gm/cc) | viscosity | =   | 5.65  | (log  | 10   | poise) | (analysis | in   | wt  | %)     |       |       |
|            | G                                          | =                                                      | -504729.23   | (J)           | H          | =           | -415511.32 | (J)     | S         | =   | 80.12 | (J/K) | V    | =      | 13.9      | (cc) | Cp  | =      | 42.19 | (J/K) |
|            | SiO2                                       | TiO2                                                   | Al2O3        | Fe2O3         | Cr2O3      | FeO         | MnO        | MgO     | NiO       | CoO | CaO   | Na2O  | K2O  | P2O5   | H2O       | CO2  | SO3 | Cl2O-1 | F2O-1 |       |
|            | 69.51                                      | 0.1                                                    | 12.47        | 0.57          | 0          | 1.83        | 0.71       | 0.28    | 0         | 0   | 2.33  | 4.07  | 3.62 | 0.68   | 3.84      | 0    | 0   | 0      | 0     |       |
| opx        | mass                                       | =                                                      | 0.05         | (gm)          | density    | =           | 3.57       | (gm/cc) | (analysis | in  | mole  | %)    |      |        |           |      |     |        |       |       |
|            | opx                                        | Na0.00Ca0.02Fe""1.06Mg0.86Fe""0.02Ti0.00Al0.09Si1.94O6 |              |               |            |             |            |         |           |     |       |       |      |        |           |      |     |        |       |       |
|            | G                                          | =                                                      | -651.49      | (J)           | H          | =           | -539.12    | (J)     | S         | =   | 0.1   | (J/K) | V    | =      | 0.01      | (cc) | Cp  | =      | 0.06  | (J/K) |
|            | diopside                                   | clinoenstatit                                          | hedenbergite | alumino-buffo | buffonite  | essenite    | jadeite    |         |           |     |       |       |      |        |           |      |     |        |       |       |
|            | -109.23                                    | 97.5                                                   | 106          | 3.23          | -3.18      | 5.56        | 0.12       |         |           |     |       |       |      |        |           |      |     |        |       |       |
| feldspar   | mass                                       | =                                                      | 0.52         | (gm)          | density    | =           | 2.6        | (gm/cc) | (analysis | in  | mole  | %)    |      |        |           |      |     |        |       |       |
|            | K0.04Na0.68Ca0.28Al1.28Si2.72O8            |                                                        |              |               |            |             |            |         |           |     |       |       |      |        |           |      |     |        |       |       |
|            | G                                          | =                                                      | -8586.3      | (J)           | H          | =           | -7321.05   | (J)     | S         | =   | 1.14  | (J/K) | V    | =      | 0.2       | (cc) | Cp  | =      | 0.63  | (J/K) |
|            | albite                                     | anorthite                                              | sanidine     |               |            |             |            |         |           |     |       |       |      |        |           |      |     |        |       |       |
|            | 67.86                                      | 28.33                                                  | 3.8          |               |            |             |            |         |           |     |       |       |      |        |           |      |     |        |       |       |
| spinel     | mass                                       | =                                                      | 0.04         | (gm)          | density    | =           | 4.92       | (gm/cc) | (analysis | in  | mole  | %)    |      |        |           |      |     |        |       |       |
|            | Fe""1.10Mg0.06Fe""1.56Al0.13Cr0.00Ti0.16O4 |                                                        |              |               |            |             |            |         |           |     |       |       |      |        |           |      |     |        |       |       |
|            | G                                          | =                                                      | -269.34      | (J)           | H          | =           | -188.7     | (J)     | S         | =   | 0.07  | (J/K) | V    | =      | 0.01      | (cc) | Cp  | =      | 0.04  | (J/K) |
|            | chromite                                   | hercynite                                              | magnetite    | spinel        | ulvospinel |             |            |         |           |     |       |       |      |        |           |      |     |        |       |       |
|            | 0                                          | 0.67                                                   | 77.79        | 5.84          | 15.69      |             |            |         |           |     |       |       |      |        |           |      |     |        |       |       |
| water      | mass                                       | =                                                      | 1.81         | (gm)          | density    | =           | 0.22       | (gm/cc) |           |     |       |       |      |        |           |      |     |        |       |       |
|            | H2O                                        |                                                        |              |               |            |             |            |         |           |     |       |       |      |        |           |      |     |        |       |       |
|            | G                                          | =                                                      | -41370.14    | (J)           | H          | =           | -21907.6   | (J)     | S         | =   | 17.48 | (J/K) | V    | =      | 8.35      | (cc) | Cp  | =      | 6.18  | (J/K) |
| Total      | solids                                     | mass                                                   | =            | 2.42          | (gm)       | density     | =          | 0.28    | (gm/cc)   |     |       |       |      |        |           |      |     |        |       |       |
|            | G                                          | =                                                      | -50877.26    | (J)           | H          | =           | -29956.47  | (J)     | S         | =   | 18.79 | (J/K) | V    | =      | 8.58      | (cc) | Cp  | =      | 6.9   | (J/K) |
| Summary    | of                                         | all                                                    | fractionated | phases:       | (total     | mass        | =          | 66.01   | grams)    |     |       |       |      |        |           |      |     |        |       |       |
| opx        | mass                                       | =                                                      | 6.52         | (gm)          | density    | =           | 3.44       | (gm/cc) | (analysis | in  | mole  | %)    |      |        |           |      |     |        |       |       |
|            | opx                                        | Na0.00Ca0.06Fe""0.73Mg1.15Fe""0.02Ti0.00Al0.10Si1.94O6 |              |               |            |             |            |         |           |     |       |       |      |        |           |      |     |        |       |       |
|            | G                                          | =                                                      | -91218.67    | (J)           | H          | =           | -76371.28  | (J)     | S         | =   | 13.33 | (J/K) | V    | =      | 1.9       | (cc) | Cp  | =      | 7.58  | (J/K) |
|            | diopside                                   | clinoenstatit                                          | hedenbergite | alumino-buffo | buffonite  | essenite    | jadeite    |         |           |     |       |       |      |        |           |      |     |        |       |       |
|            | -73.19                                     | 94.1                                                   | 72.64        | 3.94          | -3.7       | 6.07        | 0.13       |         |           |     |       |       |      |        |           |      |     |        |       |       |
| cpx        | mass                                       | =                                                      | 7.44         | (gm)          | density    | =           | 3.32       | (gm/cc) | (analysis | in  | mole  | %)    |      |        |           |      |     |        |       |       |
|            | cpx                                        | Na0.01Ca0.83Fe""0.24Mg0.75Fe""0.06Ti0.03Al0.24Si1.83O6 |              |               |            |             |            |         |           |     |       |       |      |        |           |      |     |        |       |       |
|            | G                                          | =                                                      | -112533.54   | (J)           | H          | =           | -95812.57  | (J)     | S         | =   | 15.01 | (J/K) | V    | =      | 2.24      | (cc) | Cp  | =      | 8.43  | (J/K) |
|            | diopside                                   | clinoenstatit                                          | hedenbergite | alumino-buffo | buffonite  | essenite    | jadeite    |         |           |     |       |       |      |        |           |      |     |        |       |       |
|            | 41.95                                      | 15.49                                                  | 24.27        | 10.61         | -5.51      | 11.75       | 1.43       |         |           |     |       |       |      |        |           |      |     |        |       |       |
| feldspar   | mass                                       | =                                                      | 47.05        | (gm)          | density    | =           | 2.67       | (gm/cc) | (analysis | in  | mole  | %)    |      |        |           |      |     |        |       |       |
|            | K0.01Na0.33Ca0.66Al1.66Si2.34O8            |                                                        |              |               |            |             |            |         |           |     |       |       |      |        |           |      |     |        |       |       |
|            | G                                          | =                                                      | -778486.6    | (J)           | H          | =           | -666899.12 | (J)     | S         | =   | 100.2 | (J/K) | V    | =      | 17.63     | (cc) | Cp  | =      | 56.09 | (J/K) |
|            | albite                                     | anorthite                                              | sanidine     |               |            |             |            |         |           |     |       |       |      |        |           |      |     |        |       |       |
|            | 33.49                                      | 65.51                                                  | 1            |               |            |             |            |         |           |     |       |       |      |        |           |      |     |        |       |       |
| spinel     | mass                                       | =                                                      | 5            | (gm)          | density    | =           | 4.8        | (gm/cc) | (analysis | in  | mole  | %)    |      |        |           |      |     |        |       |       |
|            | Fe""1.11Mg0.15Fe""1.26Al0.22Cr0.00Ti0.26O4 |                                                        |              |               |            |             |            |         |           |     |       |       |      |        |           |      |     |        |       |       |
|            | G                                          | =                                                      | -37640.52    | (J)           | H          | =           | -27147.06  | (J)     | S         | =   | 9.42  | (J/K) | V    | =      | 1.04      | (cc) | Cp  | =      | 4.54  | (J/K) |
|            | chromite                                   | hercynite                                              | magnetite    | spinel        | ulvospinel |             |            |         |           |     |       |       |      |        |           |      |     |        |       |       |
|            | 0                                          | -4.52                                                  | 63.19        | 15.33         | 26         |             |            |         |           |     |       |       |      |        |           |      |     |        |       |       |
| Viscosity  | of                                         | the                                                    | System       | cannot        | be         | computed.   |            |         |           |     |       |       |      |        |           |      |     |        |       |       |

|                 |                                              |                            |                                            |                                         |                     |                   |                    |                 |                |         |                |               |         |             |                    |              |          |        |                |       |
|-----------------|----------------------------------------------|----------------------------|--------------------------------------------|-----------------------------------------|---------------------|-------------------|--------------------|-----------------|----------------|---------|----------------|---------------|---------|-------------|--------------------|--------------|----------|--------|----------------|-------|
| System          | mass<br>G                                    | =<br>=                     | 99.5<br>-1575485.82                        | (gm)<br>(J)                             | density<br>H        | =<br>=            | 2.2<br>-1311697.81 | (gm/cc)<br>(J)  | S              | =       | 236.88         | (J/K)         | V       | =           | 45.29              | (cc)         | Cp       | =      | 125.72         | (J/K) |
| Oxygen          | delta<br>G                                   | moles<br>=                 | =<br>-1168.36                              | 0.00469686<br>(J)                       | delta<br>H          | grams<br>=        | =<br>125.34        | 0.150294<br>(J) | S              | =       | 1.16           | (J/K)         | V       | =           | 434.88             | (cc)         | Cp       | =      | 0.17           | (J/K) |
| *****-----***** |                                              |                            |                                            |                                         |                     |                   |                    |                 |                |         |                |               |         |             |                    |              |          |        |                |       |
| Model 828 Bokan |                                              |                            |                                            |                                         |                     |                   |                    |                 |                |         |                |               |         |             |                    |              |          |        |                |       |
| Temp (oC)       | =                                            | 835.47                     |                                            |                                         |                     |                   |                    |                 |                |         |                |               |         |             |                    |              |          |        |                |       |
| Constraint      | Flags:                                       | fO2                        | path                                       | =                                       | QFM                 | Fractionate       | Solids             |                 |                |         |                |               |         |             |                    |              |          |        |                |       |
| Liquid          | mass<br>G                                    | =<br>=                     | 30.47<br>-494671.93                        | (gm)<br>(J)                             | density<br>H        | =<br>=            | 2.24<br>-407850.6  | (gm/cc)<br>(J)  | viscosity<br>S | =<br>=  | 5.71<br>78.31  | (log<br>(J/K) | 10<br>V | poise=<br>= | (analysis<br>13.63 | in<br>(cc)   | wt<br>Cp | %<br>= | 41.3           | (J/K) |
|                 | SiO2                                         | TiO2                       | Al2O3                                      | Fe2O3                                   | Cr2O3               | FeO               | MnO                | MgO             | NiO            | CoO     | CaO            | Na2O          | K2O     | P2O5        | H2O                | CO2          | SO3      | Cl2O-1 | F2O-1          |       |
|                 | 69.81                                        | 0.1                        | 12.31                                      | 0.55                                    | 0                   | 1.74              | 0.72               | 0.27            | 0              | 0       | 2.28           | 4.01          | 3.68    | 0.69        | 3.83               | 0            | 0        | 0      | 0              |       |
| opx             | mass<br>opx<br>G                             | =<br>Na0.00Ca0.02Fe"<br>=  | 0.05<br>0.07Mg0.84Fe""<br>-609.64          | (gm)<br>0.02Ti0.00Al0.09Si1.94O6<br>(J) | density<br>H        | =<br>=            | 3.57<br>-504.88    | (gm/cc)<br>(J)  | {analysis<br>S | in<br>= | mole<br>0.09   | %<br>(J/K)    |         |             |                    |              |          |        |                |       |
|                 | diopside<br>-110.75                          | clinoenstatit<br>97.61     | hedenbergite<br>107.45                     | alumno-buffo<br>3.19                    | buffonite<br>-3.15  | essenite<br>5.52  | jadeite<br>0.12    |                 |                |         |                |               |         |             |                    |              |          |        |                |       |
| feldspar        | mass<br>K0.04Na0.69Ca0.27Al1.27Si2.73O8<br>G | =<br>=                     | 0.5<br>-8321.13                            | (gm)<br>(J)                             | density<br>H        | =<br>=            | 2.6<br>-7101.72    | (gm/cc)<br>(J)  | {analysis<br>S | in<br>= | mole<br>1.1    | %<br>(J/K)    | V<br>=  |             |                    |              |          |        |                |       |
|                 | albite<br>68.78                              | anorthite<br>27.19         | sanidine<br>4.03                           |                                         |                     |                   |                    |                 |                |         |                |               |         |             |                    |              |          |        |                |       |
| spinel          | mass<br>Fe""1.10Mg0.06Fe""<br>G              | =<br>=                     | 0.04<br>1.56Al0.13Cr0.00Ti0.15O4<br>-251.4 | (gm)<br>(J)                             | density<br>H        | =<br>=            | 4.92<br>-176.38    | (gm/cc)<br>(J)  | {analysis<br>S | in<br>= | mole<br>0.07   | %<br>(J/K)    | V<br>=  |             |                    |              |          |        |                |       |
|                 | chromite<br>0                                | hercynite<br>0.73          | magnetite<br>78.22                         | spinel<br>5.63                          | ulvospinel<br>15.41 |                   |                    |                 |                |         |                |               |         |             |                    |              |          |        |                |       |
| water           | mass<br>H2O<br>G                             | =<br>=                     | 1.83<br>-41865.08                          | (gm)<br>(J)                             | density<br>H        | =<br>=            | 0.22<br>-22247.99  | (gm/cc)<br>(J)  | S<br>=         | =<br>=  | 17.7<br>17.7   | (J/K)         | V<br>=  | =<br>=      | 8.41<br>8.41       | (cc)<br>(cc) | Cp<br>=  | =<br>= | 6.29<br>6.29   | (J/K) |
| Total           | solids<br>G                                  | mass<br>=                  | =<br>-51047.25                             | 2.42<br>(J)                             | (gm)<br>H           | density<br>=      | =<br>-30030.97     | 0.28<br>(J)     | (gm/cc)<br>S   | =<br>=  | 18.96<br>18.96 | (J/K)         | V<br>=  | =<br>=      | 8.62<br>8.62       | (cc)<br>(cc) | Cp<br>=  | =<br>= | 6.99<br>6.99   | (J/K) |
| Summary         | of                                           | all                        | fractionated                               | phases:                                 | (total              | mass              | =                  | 66.61           | grams)         |         |                |               |         |             |                    |              |          |        |                |       |
| opx             | mass<br>opx<br>G                             | =<br>Na0.00Ca0.06Fe""<br>= | 6.57<br>0.73Mg1.15Fe""<br>-91772.83        | (gm)<br>(J)                             | density<br>H        | =<br>=            | 3.44<br>-76923.34  | (gm/cc)<br>(J)  | {analysis<br>S | in<br>= | mole<br>13.39  | %<br>(J/K)    | V<br>=  |             |                    |              |          |        |                |       |
|                 | diopside<br>-73.44                           | clinoenstatit<br>94.12     | hedenbergite<br>72.87                      | alumino-buffo<br>3.93                   | buffonite<br>-3.69  | essenite<br>6.07  | jadeite<br>0.13    |                 |                |         |                |               |         |             |                    |              |          |        |                |       |
| cpx             | mass<br>cpx<br>G                             | =<br>Na0.01Ca0.83Fe""<br>= | 7.44<br>0.24Mg0.75Fe""<br>-112458.56       | (gm)<br>(J)                             | density<br>H        | =<br>=            | 3.32<br>-95854.69  | (gm/cc)<br>(J)  | {analysis<br>S | in<br>= | mole<br>14.98  | %<br>(J/K)    | V<br>=  | =<br>=      | 2.24<br>2.24       | (cc)<br>(cc) | Cp<br>=  | =<br>= | 8.42<br>8.42   | (J/K) |
|                 | diopside<br>41.95                            | clinoenstatit<br>15.49     | hedenbergite<br>24.27                      | alumino-buffo<br>10.61                  | buffonite<br>-5.51  | essenite<br>11.75 | jadeite<br>1.43    |                 |                |         |                |               |         |             |                    |              |          |        |                |       |
| feldspar        | mass<br>K0.01Na0.34Ca0.65Al1.65Si2.35O8<br>G | =<br>=                     | 47.56<br>-786526.22                        | (gm)<br>(J)                             | density<br>H        | =<br>=            | 2.67<br>-674464.58 | (gm/cc)<br>(J)  | {analysis<br>S | in<br>= | mole<br>101.08 | %<br>(J/K)    | V<br>=  | =<br>=      | 17.83<br>17.83     | (cc)<br>(cc) | Cp<br>=  | =<br>= | 56.68<br>56.68 | (J/K) |
|                 | albite                                       | anorthite                  | sanidine                                   |                                         |                     |                   |                    |                 |                |         |                |               |         |             |                    |              |          |        |                |       |

|                 |                                 |        |                              |                          |              |             |             |          |           |     |       |       |      |        |           |      |     |     |        |       |
|-----------------|---------------------------------|--------|------------------------------|--------------------------|--------------|-------------|-------------|----------|-----------|-----|-------|-------|------|--------|-----------|------|-----|-----|--------|-------|
|                 | 33.87                           | 65.1   | 1.03                         |                          |              |             |             |          |           |     |       |       |      |        |           |      |     |     |        |       |
| spinel          | mass                            | =      | 5.04                         | (gm)                     | density      | =           | 4.8         | (gm/cc)  | (analysis | in  | mole  | %)    |      |        |           |      |     |     |        |       |
|                 | Fe"1.11Mg0.15Fe"                | =      | 1.27Al0.22Cr0.00Ti0.26O4     | (J)                      | H            | =           | -27347.81   | (J)      | S         | =   | 9.47  | (J/K) | V    | =      | 1.05      | (cc) | Cp  | =   | 4.57   | (J/K) |
|                 | chromite                        | =      | hercynite                    | magnetite                | spinel       | ulvospinel  |             |          |           |     |       |       |      |        |           |      |     |     |        |       |
|                 | 0                               | =      | -4.48                        | 63.3                     | 15.26        | 25.92       |             |          |           |     |       |       |      |        |           |      |     |     |        |       |
| Viscosity       | of                              | the    | System                       | cannot                   | be           | computed.   |             |          |           |     |       |       |      |        |           |      |     |     |        |       |
| System          | mass                            | =      | 99.5                         | (gm)                     | density      | =           | 2.2         | (gm/cc)  |           |     |       |       |      |        |           |      |     |     |        |       |
|                 | G                               | =      | -1574323.99                  | (J)                      | H            | =           | -1312471.99 | (J)      | S         | =   | 236.2 | (J/K) | V    | =      | 45.28     | (cc) | Cp  | =   | 125.6  | (J/K) |
| Oxygen          | delta                           | moles  | =                            | 0.00472865               | delta        | grams       | =           | 0.151311 |           |     |       |       |      |        |           |      |     |     |        |       |
|                 | G                               | =      | -1170.42                     | (J)                      | H            | =           | 125.35      | (J)      | S         | =   | 1.17  | (J/K) | V    | =      | 435.86    | (cc) | Cp  | =   | 0.17   | (J/K) |
| *****-----***** |                                 |        |                              |                          |              |             |             |          |           |     |       |       |      |        |           |      |     |     |        |       |
| Model 828 Bokan |                                 |        |                              |                          |              |             |             |          |           |     |       |       |      |        |           |      |     |     |        |       |
| Temp (oC)       | =                               | 830.47 |                              |                          |              |             |             |          |           |     |       |       |      |        |           |      |     |     |        |       |
| Constraint      | Flags:                          | fO2    | path                         | =                        | QFM          | Fractionate | Solids      |          |           |     |       |       |      |        |           |      |     |     |        |       |
| Liquid          | mass                            | =      | 29.88                        | (gm)                     | density      | =           | 2.23        | (gm/cc)  | viscosity | =   | 5.78  | (log  | 10   | poise) | (analysis | in   | wt  | %)  |        |       |
|                 | G                               | =      | -484953.88                   | (J)                      | H            | =           | -400444.08  | (J)      | S         | =   | 76.58 | (J/K) | V    | =      | 13.37     | (cc) | Cp  | =   | 40.45  | (J/K) |
|                 | SiO2                            | =      | TiO2                         | Al2O3                    | Fe2O3        | Cr2O3       | FeO         | MnO      | MgO       | NiO | CoO   | CaO   | Na2O | K2O    | P2O5      | H2O  | CO2 | SO3 | Cl2O-1 | F2O-1 |
|                 | 70.1                            | =      | 0.09                         | 12.16                    | 0.53         | 0           | 1.67        | 0.74     | 0.25      | 0   | 0     | 2.23  | 3.96 | 3.74   | 0.7       | 3.82 | 0   | 0   | 0      | 0     |
| opx             | mass                            | =      | 0.04                         | (gm)                     | density      | =           | 3.58        | (gm/cc)  | (analysis | in  | mole  | %)    |      |        |           |      |     |     |        |       |
|                 | opx                             | =      | Na0.00Ca0.02Fe"1.09Mg0.83Fe" | 0.02Ti0.00Al0.09Si1.94O6 | H            | =           | -473.17     | (J)      | S         | =   | 0.09  | (J/K) | V    | =      | 0.01      | (cc) | Cp  | =   | 0.05   | (J/K) |
|                 | G                               | =      | -570.9                       | (J)                      | H            | =           | -473.17     | (J)      | S         | =   | 0.09  | (J/K) | V    | =      | 0.01      | (cc) | Cp  | =   | 0.05   | (J/K) |
|                 | diopside                        | =      | clinoenstatit                | hedenbergite             | alumno-buffo | buffonite   | essenite    | jadeite  |           |     |       |       |      |        |           |      |     |     |        |       |
|                 | -112.25                         | =      | 97.71                        | 108.9                    | 3.15         | -3.11       | 5.48        | 0.12     |           |     |       |       |      |        |           |      |     |     |        |       |
| feldspar        | mass                            | =      | 0.49                         | (gm)                     | density      | =           | 2.59        | (gm/cc)  | (analysis | in  | mole  | %)    |      |        |           |      |     |     |        |       |
|                 | K0.04Na0.70Ca0.26Al1.26Si2.74O8 | =      | -8062.99                     | (J)                      | H            | =           | -6887.98    | (J)      | S         | =   | 1.06  | (J/K) | V    | =      | 0.19      | (cc) | Cp  | =   | 0.59   | (J/K) |
|                 | G                               | =      | -8062.99                     | (J)                      | H            | =           | -6887.98    | (J)      | S         | =   | 1.06  | (J/K) | V    | =      | 0.19      | (cc) | Cp  | =   | 0.59   | (J/K) |
|                 | albite                          | =      | anorthite                    | sanidine                 |              |             |             |          |           |     |       |       |      |        |           |      |     |     |        |       |
|                 | 69.64                           | =      | 26.09                        | 4.27                     |              |             |             |          |           |     |       |       |      |        |           |      |     |     |        |       |
| spinel          | mass                            | =      | 0.03                         | (gm)                     | density      | =           | 4.93        | (gm/cc)  | (analysis | in  | mole  | %)    |      |        |           |      |     |     |        |       |
|                 | Fe"1.10Mg0.05Fe"                | =      | 1.57Al0.12Cr0.00Ti0.15O4     | (J)                      | H            | =           | -164.87     | (J)      | S         | =   | 0.06  | (J/K) | V    | =      | 0.01      | (cc) | Cp  | =   | 0.03   | (J/K) |
|                 | G                               | =      | -234.66                      | (J)                      | H            | =           | -164.87     | (J)      | S         | =   | 0.06  | (J/K) | V    | =      | 0.01      | (cc) | Cp  | =   | 0.03   | (J/K) |
|                 | chromite                        | =      | hercynite                    | magnetite                | spinel       | ulvospinel  |             |          |           |     |       |       |      |        |           |      |     |     |        |       |
|                 | 0                               | =      | 0.79                         | 78.63                    | 5.42         | 15.16       |             |          |           |     |       |       |      |        |           |      |     |     |        |       |
| water           | mass                            | =      | 1.86                         | (gm)                     | density      | =           | 0.22        | (gm/cc)  |           |     |       |       |      |        |           |      |     |     |        |       |
|                 | H2O                             | =      | -42340.85                    | (J)                      | H            | =           | -22580.41   | (J)      | S         | =   | 17.91 | (J/K) | V    | =      | 8.45      | (cc) | Cp  | =   | 6.41   | (J/K) |
|                 | G                               | =      | -42340.85                    | (J)                      | H            | =           | -22580.41   | (J)      | S         | =   | 17.91 | (J/K) | V    | =      | 8.45      | (cc) | Cp  | =   | 6.41   | (J/K) |
| Total           | solids                          | mass   | =                            | 2.43                     | (gm)         | density     | =           | 0.28     | (gm/cc)   |     |       |       |      |        |           |      |     |     |        |       |
|                 | G                               | =      | -51209.4                     | (J)                      | H            | =           | -30106.44   | (J)      | S         | =   | 19.12 | (J/K) | V    | =      | 8.66      | (cc) | Cp  | =   | 7.08   | (J/K) |
| Summary         | of                              | all    | fractionated                 | phases:                  | (total       | mass        | =           | 67.19    | grams)    |     |       |       |      |        |           |      |     |     |        |       |
| opx             | mass                            | =      | 6.61                         | (gm)                     | density      | =           | 3.44        | (gm/cc)  | (analysis | in  | mole  | %)    |      |        |           |      |     |     |        |       |
|                 | opx                             | =      | Na0.00Ca0.06Fe"0.73Mg1.15Fe" | 0.02Ti0.00Al0.10Si1.94O6 | H            | =           | -77441.45   | (J)      | S         | =   | 13.45 | (J/K) | V    | =      | 1.92      | (cc) | Cp  | =   | 7.67   | (J/K) |
|                 | G                               | =      | -92284.94                    | (J)                      | H            | =           | -77441.45   | (J)      | S         | =   | 13.45 | (J/K) | V    | =      | 1.92      | (cc) | Cp  | =   | 7.67   | (J/K) |
|                 | diopside                        | =      | clinoenstatit                | hedenbergite             | alumno-buffo | buffonite   | essenite    | jadeite  |           |     |       |       |      |        |           |      |     |     |        |       |
|                 | -73.69                          | =      | 94.15                        | 73.1                     | 3.93         | -3.69       | 6.07        | 0.13     |           |     |       |       |      |        |           |      |     |     |        |       |
| cpx             | mass                            | =      | 7.44                         | (gm)                     | density      | =           | 3.32        | (gm/cc)  | (analysis | in  | mole  | %)    |      |        |           |      |     |     |        |       |

|           |                                           |                                                       |              |               |            |           |             |          |           |    |        |       |   |   |       |      |    |   |        |       |
|-----------|-------------------------------------------|-------------------------------------------------------|--------------|---------------|------------|-----------|-------------|----------|-----------|----|--------|-------|---|---|-------|------|----|---|--------|-------|
|           | cpx                                       | Na0.01Ca0.83Fe"0.24Mg0.75Fe""0.06Ti0.03Al0.24Si1.83O6 |              |               |            |           |             |          |           |    |        |       |   |   |       |      |    |   |        |       |
|           | G                                         | =                                                     | -112383.77   | (J)           | H          | =         | -95896.78   | (J)      | S         | =  | 14.94  | (J/K) | V | = | 2.24  | (cc) | Cp | = | 8.42   | (J/K) |
|           | diopside                                  | clinoenstatit                                         | hedenbergite | alumino-buffo | buffonite  | essenite  | jadeite     |          |           |    |        |       |   |   |       |      |    |   |        |       |
|           | 41.95                                     | 15.49                                                 | 24.27        | 10.61         | -5.51      | 11.75     | 1.43        |          |           |    |        |       |   |   |       |      |    |   |        |       |
| feldspar  | mass                                      | =                                                     | 48.07        | (gm)          | density    | =         | 2.67        | (gm/cc)  | (analysis | in | mole   | %)    |   |   |       |      |    |   |        |       |
|           | K0.01Na0.34Ca0.65Al1.65Si2.35O8           |                                                       |              |               |            |           |             |          |           |    |        |       |   |   |       |      |    |   |        |       |
|           | G                                         | =                                                     | -794296.57   | (J)           | H          | =         | -681813.6   | (J)      | S         | =  | 101.92 | (J/K) | V | = | 18.02 | (cc) | Cp | = | 57.26  | (J/K) |
|           | albite                                    | anorthite                                             | sanidine     |               |            |           |             |          |           |    |        |       |   |   |       |      |    |   |        |       |
|           | 34.25                                     | 64.69                                                 | 1.06         |               |            |           |             |          |           |    |        |       |   |   |       |      |    |   |        |       |
| spinel    | mass                                      | =                                                     | 5.07         | (gm)          | density    | =         | 4.8         | (gm/cc)  | (analysis | in | mole   | %)    |   |   |       |      |    |   |        |       |
|           | Fe"1.11Mg0.15Fe""1.27Al0.22Cr0.00Ti0.26O4 |                                                       |              |               |            |           |             |          |           |    |        |       |   |   |       |      |    |   |        |       |
|           | G                                         | =                                                     | -38035.77    | (J)           | H          | =         | -27536.41   | (J)      | S         | =  | 9.51   | (J/K) | V | = | 1.06  | (cc) | Cp | = | 4.6    | (J/K) |
|           | chromite                                  | hercynite                                             | magnetite    | spinel        | ulvospinel |           |             |          |           |    |        |       |   |   |       |      |    |   |        |       |
|           | 0                                         | -4.45                                                 | 63.4         | 15.2          | 25.85      |           |             |          |           |    |        |       |   |   |       |      |    |   |        |       |
| Viscosity | of                                        | the                                                   | System       | cannot        | be         | computed. |             |          |           |    |        |       |   |   |       |      |    |   |        |       |
| System    | mass                                      | =                                                     | 99.5         | (gm)          | density    | =         | 2.2         | (gm/cc)  |           |    |        |       |   |   |       |      |    |   |        |       |
|           | G                                         | =                                                     | -1573164.33  | (J)           | H          | =         | -1313238.76 | (J)      | S         | =  | 235.52 | (J/K) | V | = | 45.28 | (cc) | Cp | = | 125.48 | (J/K) |
| Oxygen    | delta                                     | moles                                                 | =            | 0.00475814    | delta      | grams     | =           | 0.152255 |           |    |        |       |   |   |       |      |    |   |        |       |
|           | G                                         | =                                                     | -1171.84     | (J)           | H          | =         | 125.29      | (J)      | S         | =  | 1.18   | (J/K) | V | = | 436.6 | (cc) | Cp | = | 0.17   | (J/K) |

\*\*\*\*\*\_\*\*\*\*\*

Model 828 Bokan

|            |                                           |                                                       |              |               |            |             |            |         |           |     |       |       |     |        |           |      |     |        |       |  |
|------------|-------------------------------------------|-------------------------------------------------------|--------------|---------------|------------|-------------|------------|---------|-----------|-----|-------|-------|-----|--------|-----------|------|-----|--------|-------|--|
| Temp (oC)  | =                                         | 825.47                                                |              |               |            |             |            |         |           |     |       |       |     |        |           |      |     |        |       |  |
| Constraint | Flags:                                    | fO2                                                   | path         | =             | QFM        | Fractionate | Solids     |         |           |     |       |       |     |        |           |      |     |        |       |  |
| Liquid     | mass                                      | =                                                     | 29.32        | (gm)          | density    | =           | 2.23       | (gm/cc) | viscosity | =   | 5.84  | (log  | 10  | poise) | (analysis | in   | wt  | %)     |       |  |
|            | G                                         | =                                                     | -475563.78   | (J)           | H          | =           | -393283.67 | (J)     | S         | =   | 74.89 | (J/K) | V   | =      | 13.12     | (cc) | Cp  | =      | 39.62 |  |
|            | SiO2                                      | TiO2                                                  | Al2O3        | Fe2O3         | Cr2O3      | FeO         | MnO        | MgO     | NiO       | CoO | CaO   | Na2O  | K2O | P2O5   | H2O       | CO2  | SO3 | Cl2O-1 | F2O-1 |  |
|            | 70.39                                     | 0.09                                                  | 12           | 0.51          | 0          | 1.59        | 0.75       | 0.24    | 0         | 0   | 2.19  | 3.91  | 3.8 | 0.72   | 3.82      | 0    | 0   | 0      | 0     |  |
| opx        | mass                                      | =                                                     | 0.04         | (gm)          | density    | =           | 3.58       | (gm/cc) | (analysis | in  | mole  | %)    |     |        |           |      |     |        |       |  |
|            | opx                                       | Na0.00Ca0.02Fe"1.10Mg0.82Fe""0.02Ti0.00Al0.09Si1.95O6 |              |               |            |             |            |         |           |     |       |       |     |        |           |      |     |        |       |  |
|            | G                                         | =                                                     | -535.01      | (J)           | H          | =           | -443.77    | (J)     | S         | =   | 0.08  | (J/K) | V   | =      | 0.01      | (cc) | Cp  | =      | 0.05  |  |
|            | diopside                                  | clinoenstatit                                         | hedenbergite | alumino-buffo | buffonite  | essenite    | jadeite    |         |           |     |       |       |     |        |           |      |     |        |       |  |
|            | -113.74                                   | 97.81                                                 | 110.33       | 3.11          | -3.07      | 5.44        | 0.11       |         |           |     |       |       |     |        |           |      |     |        |       |  |
| feldspar   | mass                                      | =                                                     | 0.47         | (gm)          | density    | =           | 2.59       | (gm/cc) | (analysis | in  | mole  | %)    |     |        |           |      |     |        |       |  |
|            | K0.05Na0.70Ca0.25Al1.25Si2.75O8           |                                                       |              |               |            |             |            |         |           |     |       |       |     |        |           |      |     |        |       |  |
|            | G                                         | =                                                     | -7811.53     | (J)           | H          | =           | -6679.57   | (J)     | S         | =   | 1.03  | (J/K) | V   | =      | 0.18      | (cc) | Cp  | =      | 0.57  |  |
|            | albite                                    | anorthite                                             | sanidine     |               |            |             |            |         |           |     |       |       |     |        |           |      |     |        |       |  |
|            | 70.46                                     | 25.01                                                 | 4.53         |               |            |             |            |         |           |     |       |       |     |        |           |      |     |        |       |  |
| spinel     | mass                                      | =                                                     | 0.03         | (gm)          | density    | =           | 4.93       | (gm/cc) | (analysis | in  | mole  | %)    |     |        |           |      |     |        |       |  |
|            | Fe"1.10Mg0.05Fe""1.58Al0.12Cr0.00Ti0.15O4 |                                                       |              |               |            |             |            |         |           |     |       |       |     |        |           |      |     |        |       |  |
|            | G                                         | =                                                     | -219.04      | (J)           | H          | =           | -154.12    | (J)     | S         | =   | 0.06  | (J/K) | V   | =      | 0.01      | (cc) | Cp  | =      | 0.03  |  |
|            | chromite                                  | hercynite                                             | magnetite    | spinel        | ulvospinel |             |            |         |           |     |       |       |     |        |           |      |     |        |       |  |
|            | 0                                         | 0.83                                                  | 79.03        | 5.23          | 14.92      |             |            |         |           |     |       |       |     |        |           |      |     |        |       |  |
| water      | mass                                      | =                                                     | 1.88         | (gm)          | density    | =           | 0.22       | (gm/cc) |           |     |       |       |     |        |           |      |     |        |       |  |
|            | H2O                                       |                                                       |              |               |            |             |            |         |           |     |       |       |     |        |           |      |     |        |       |  |
|            | G                                         | =                                                     | -42797.94    | (J)           | H          | =           | -22905.04  | (J)     | S         | =   | 18.11 | (J/K) | V   | =      | 8.49      | (cc) | Cp  | =      | 6.52  |  |
| Total      | solids                                    | mass                                                  | =            | 2.43          | (gm)       | density     | =          | 0.28    | (gm/cc)   |     |       |       |     |        |           |      |     |        |       |  |
|            | G                                         | =                                                     | -51363.51    | (J)           | H          | =           | -30182.5   | (J)     | S         | =   | 19.28 | (J/K) | V   | =      | 8.7       | (cc) | Cp  | =      | 7.17  |  |

|                 |                                 |                          |               |                          |            |             |             |          |           |     |        |       |      |        |           |      |     |        |        |
|-----------------|---------------------------------|--------------------------|---------------|--------------------------|------------|-------------|-------------|----------|-----------|-----|--------|-------|------|--------|-----------|------|-----|--------|--------|
| Summary         | of                              | all                      | fractionated  | phases:                  | (total     | mass        | =           | 67.75    | grams)    |     |        |       |      |        |           |      |     |        |        |
| opx             | mass                            | =                        | 6.65          | (gm)                     | density    | =           | 3.44        | (gm/cc)  | (analysis | in  | mole   | %)    |      |        |           |      |     |        |        |
|                 | opx                             | Na0.00Ca0.06Fe"          | 0.73Mg1.15Fe" | 0.02Ti0.00Al0.10Si1.94O6 |            |             |             |          |           |     |        |       |      |        |           |      |     |        |        |
|                 | G                               | =                        | -92758.13     | (J)                      | H          | =           | -77928.1    | (J)      | S         | =   | 13.5   | (J/K) | V    | =      | 1.93      | (cc) | Cp  | =      | 7.72   |
|                 | diopside                        | clinoenstatit            | hedenbergite  | alumino-buffo            | buffonite  | essenite    | jadeite     |          |           |     |        |       |      |        |           |      |     |        |        |
|                 | -73.92                          | 94.17                    | 73.31         | 3.93                     | -3.69      | 6.06        | 0.13        |          |           |     |        |       |      |        |           |      |     |        |        |
| cpx             | mass                            | =                        | 7.44          | (gm)                     | density    | =           | 3.32        | (gm/cc)  | (analysis | in  | mole   | %)    |      |        |           |      |     |        |        |
|                 | cpx                             | Na0.01Ca0.83Fe"          | 0.24Mg0.75Fe" | 0.06Ti0.03Al0.24Si1.83O6 |            |             |             |          |           |     |        |       |      |        |           |      |     |        |        |
|                 | G                               | =                        | -112309.17    | (J)                      | H          | =           | -95938.85   | (J)      | S         | =   | 14.9   | (J/K) | V    | =      | 2.24      | (cc) | Cp  | =      | 8.41   |
|                 | diopside                        | clinoenstatit            | hedenbergite  | alumino-buffo            | buffonite  | essenite    | jadeite     |          |           |     |        |       |      |        |           |      |     |        |        |
|                 | 41.95                           | 15.49                    | 24.27         | 10.61                    | -5.51      | 11.75       | 1.43        |          |           |     |        |       |      |        |           |      |     |        |        |
| feldspar        | mass                            | =                        | 48.55         | (gm)                     | density    | =           | 2.67        | (gm/cc)  | (analysis | in  | mole   | %)    |      |        |           |      |     |        |        |
|                 | K0.01Na0.35Ca0.64Al1.64Si2.36O8 |                          |               |                          |            |             |             |          |           |     |        |       |      |        |           |      |     |        |        |
|                 | G                               | =                        | -801804.84    | (J)                      | H          | =           | -688951.7   | (J)      | S         | =   | 102.72 | (J/K) | V    | =      | 18.21     | (cc) | Cp  | =      | 57.82  |
|                 | albite                          | anorthite                | sanidine      |                          |            |             |             |          |           |     |        |       |      |        |           |      |     |        |        |
|                 | 34.61                           | 64.3                     | 1.09          |                          |            |             |             |          |           |     |        |       |      |        |           |      |     |        |        |
| spinel          | mass                            | =                        | 5.1           | (gm)                     | density    | =           | 4.8         | (gm/cc)  | (analysis | in  | mole   | %)    |      |        |           |      |     |        |        |
|                 | Fe"1.11Mg0.15Fe"                | 1.27Al0.21Cr0.00Ti0.26O4 |               |                          |            |             |             |          |           |     |        |       |      |        |           |      |     |        |        |
|                 | G                               | =                        | -38207.46     | (J)                      | H          | =           | -27713.66   | (J)      | S         | =   | 9.55   | (J/K) | V    | =      | 1.06      | (cc) | Cp  | =      | 4.63   |
|                 | chromite                        | hercynite                | magnetite     | spinel                   | ulvospinel |             |             |          |           |     |        |       |      |        |           |      |     |        |        |
|                 | 0                               | -4.42                    | 63.49         | 15.14                    | 25.79      |             |             |          |           |     |        |       |      |        |           |      |     |        |        |
| Viscosity       | of                              | the                      | System        | cannot                   | be         | computed.   |             |          |           |     |        |       |      |        |           |      |     |        |        |
| System          | mass                            | =                        | 99.5          | (gm)                     | density    | =           | 2.2         | (gm/cc)  |           |     |        |       |      |        |           |      |     |        |        |
|                 | G                               | =                        | -1572006.9    | (J)                      | H          | =           | -1313998.47 | (J)      | S         | =   | 234.85 | (J/K) | V    | =      | 45.26     | (cc) | Cp  | =      | 125.37 |
| Oxygen          | delta                           | moles                    | =             | 0.00478547               | delta      | grams       | =           | 0.153129 |           |     |        |       |      |        |           |      |     |        |        |
|                 | G                               | =                        | -1172.67      | (J)                      | H          | =           | 125.17      | (J)      | S         | =   | 1.18   | (J/K) | V    | =      | 437.12    | (cc) | Cp  | =      | 0.17   |
| *****-----***** |                                 |                          |               |                          |            |             |             |          |           |     |        |       |      |        |           |      |     |        |        |
| Model 828 Bokan |                                 |                          |               |                          |            |             |             |          |           |     |        |       |      |        |           |      |     |        |        |
| Temp (oC)       | =                               | 820.47                   |               |                          |            |             |             |          |           |     |        |       |      |        |           |      |     |        |        |
| Constraint      | Flags:                          | fO2                      | path          | =                        | QFM        | Fractionate | Solids      |          |           |     |        |       |      |        |           |      |     |        |        |
| Liquid          | mass                            | =                        | 28.78         | (gm)                     | density    | =           | 2.23        | (gm/cc)  | viscosity | =   | 5.9    | (log  | 10   | poise) | (analysis | in   | wt  | %)     |        |
|                 | G                               | =                        | -466490.91    | (J)                      | H          | =           | -386361.72  | (J)      | S         | =   | 73.27  | (J/K) | V    | =      | 12.88     | (cc) | Cp  | =      | 38.83  |
|                 | SiO2                            | TiO2                     | Al2O3         | Fe2O3                    | Cr2O3      | FeO         | MnO         | MgO      | NiO       | CoO | CaO    | Na2O  | K2O  | P2O5   | H2O       | CO2  | SO3 | Cl2O-1 | F2O-1  |
|                 | 70.67                           | 0.09                     | 11.85         | 0.5                      | 0          | 1.52        | 0.76        | 0.22     | 0         | 0   | 2.15   | 3.85  | 3.86 | 0.73   | 3.81      | 0    | 0   | 0      | 0      |
| opx             | mass                            | =                        | 0.04          | (gm)                     | density    | =           | 3.59        | (gm/cc)  | (analysis | in  | mole   | %)    |      |        |           |      |     |        |        |
|                 | opx                             | Na0.00Ca0.02Fe"          | 1.12Mg0.81Fe" | 0.02Ti0.00Al0.09Si1.95O6 |            |             |             |          |           |     |        |       |      |        |           |      |     |        |        |
|                 | G                               | =                        | -501.75       | (J)                      | H          | =           | -416.52     | (J)      | S         | =   | 0.08   | (J/K) | V    | =      | 0.01      | (cc) | Cp  | =      | 0.04   |
|                 | diopside                        | clinoenstatit            | hedenbergite  | alumino-buffo            | buffonite  | essenite    | jadeite     |          |           |     |        |       |      |        |           |      |     |        |        |
|                 | -115.22                         | 97.91                    | 111.76        | 3.07                     | -3.03      | 5.4         | 0.11        |          |           |     |        |       |      |        |           |      |     |        |        |
| feldspar        | mass                            | =                        | 0.46          | (gm)                     | density    | =           | 2.59        | (gm/cc)  | (analysis | in  | mole   | %)    |      |        |           |      |     |        |        |
|                 | K0.05Na0.71Ca0.24Al1.24Si2.76O8 |                          |               |                          |            |             |             |          |           |     |        |       |      |        |           |      |     |        |        |
|                 | G                               | =                        | -7566.45      | (J)                      | H          | =           | -6476.23    | (J)      | S         | =   | 1      | (J/K) | V    | =      | 0.18      | (cc) | Cp  | =      | 0.56   |
|                 | albite                          | anorthite                | sanidine      |                          |            |             |             |          |           |     |        |       |      |        |           |      |     |        |        |
|                 | 71.23                           | 23.97                    | 4.8           |                          |            |             |             |          |           |     |        |       |      |        |           |      |     |        |        |
| spinel          | mass                            | =                        | 0.03          | (gm)                     | density    | =           | 4.93        | (gm/cc)  | (analysis | in  | mole   | %)    |      |        |           |      |     |        |        |
|                 | Fe"1.10Mg0.05Fe"                | 1.59Al0.12Cr0.00Ti0.15O4 |               |                          |            |             |             |          |           |     |        |       |      |        |           |      |     |        |        |
|                 | G                               | =                        | -204.45       | (J)                      | H          | =           | -144.08     | (J)      | S         | =   | 0.06   | (J/K) | V    | =      | 0.01      | (cc) | Cp  | =      | 0.03   |
|                 | chromite                        | hercynite                | magnetite     | spinel                   | ulvospinel |             |             |          |           |     |        |       |      |        |           |      |     |        |        |

|           |                                                        |                        |                                                                             |                        |                     |                   |                    |                 |                |         |                |            |   |        |        |      |    |   |              |
|-----------|--------------------------------------------------------|------------------------|-----------------------------------------------------------------------------|------------------------|---------------------|-------------------|--------------------|-----------------|----------------|---------|----------------|------------|---|--------|--------|------|----|---|--------------|
|           | 0                                                      | 0.87                   | 79.4                                                                        | 5.03                   | 14.69               |                   |                    |                 |                |         |                |            |   |        |        |      |    |   |              |
| water     | mass<br>H2O<br>G                                       | =<br><br>=             | 1.9<br><br>-43236.81                                                        | (gm)<br>(J)            | density<br>H        | =<br>=            | 0.22<br>-23222.03  | (gm/cc)<br>(J)  | S              | =       | 18.3           | (J/K)      | V | =      | 8.53   | (cc) | Cp | = | 6.64 (J/K)   |
| Total     | solids<br>G                                            | mass<br>=              | =<br>-51509.46                                                              | 2.43<br>(J)            | (gm)<br>H           | density<br>=      | =<br>-30258.85     | 0.28<br>(J)     | (gm/cc)<br>S   | =       | 19.43          | (J/K)      | V | =      | 8.72   | (cc) | Cp | = | 7.26 (J/K)   |
| Summary   | of                                                     | all                    | fractionated                                                                | phases:                | (total              | mass              | =                  | 68.29           | grams)         |         |                |            |   |        |        |      |    |   |              |
| opx       | mass<br>opx<br>G                                       | =<br><br>=             | 6.69<br>Na0.00Ca0.06Fe"0.74Mg1.14Fe""0.02Ti0.00Al0.10Si1.94O6<br>-93195.29  | (gm)<br>(J)            | density<br>H        | =<br>=            | 3.45<br>-78385.59  | (gm/cc)<br>(J)  | (analysis<br>S | in<br>= | mole<br>13.54  | %<br>(J/K) |   | V<br>= | 1.94   | (cc) | Cp | = | 7.76 (J/K)   |
|           | diopside<br>-74.14                                     | clinoenstatit<br>94.19 | hedenbergite<br>73.52                                                       | alumino-buffo<br>3.92  | buffonite<br>-3.68  | essenite<br>6.06  | jadeite<br>0.13    |                 |                |         |                |            |   |        |        |      |    |   |              |
| cpx       | mass<br>cpx<br>G                                       | =<br><br>=             | 7.44<br>Na0.01Ca0.83Fe"0.24Mg0.75Fe""0.06Ti0.03Al0.24Si1.83O6<br>-112234.76 | (gm)<br>(J)            | density<br>H        | =<br>=            | 3.32<br>-95980.89  | (gm/cc)<br>(J)  | (analysis<br>S | in<br>= | mole<br>14.86  | %<br>(J/K) |   | V<br>= | 2.24   | (cc) | Cp | = | 8.41 (J/K)   |
|           | diopside<br>41.95                                      | clinoenstatit<br>15.49 | hedenbergite<br>24.27                                                       | alumino-buffo<br>10.61 | buffonite<br>-5.51  | essenite<br>11.75 | jadeite<br>1.43    |                 |                |         |                |            |   |        |        |      |    |   |              |
| feldspar  | mass<br>K0.01Na0.35Ca0.64Al1.64Si2.36O8<br>G           | =<br><br>=             | 49.02<br>-809057.9                                                          | (gm)<br>(J)            | density<br>H        | =<br>=            | 2.67<br>-695884.11 | (gm/cc)<br>(J)  | (analysis<br>S | in<br>= | mole<br>103.49 | %<br>(J/K) |   | V<br>= | 18.39  | (cc) | Cp | = | 58.36 (J/K)  |
|           | albite<br>34.96                                        | anorthite<br>63.91     | sanidine<br>1.13                                                            |                        |                     |                   |                    |                 |                |         |                |            |   |        |        |      |    |   |              |
| spinel    | mass<br>Fe"1.11Mg0.15Fe""1.27Al0.21Cr0.00Ti0.26O4<br>G | =<br><br>=             | 5.13<br>-38363.41                                                           | (gm)<br>(J)            | density<br>H        | =<br>=            | 4.8<br>-27880.3    | (gm/cc)<br>(J)  | (analysis<br>S | in<br>= | mole<br>9.59   | %<br>(J/K) |   | V<br>= | 1.07   | (cc) | Cp | = | 4.65 (J/K)   |
|           | chromite<br>0                                          | hercynite<br>-4.39     | magnetite<br>63.58                                                          | spinel<br>15.08        | ulvospinel<br>25.72 |                   |                    |                 |                |         |                |            |   |        |        |      |    |   |              |
| Viscosity | of                                                     | the                    | System                                                                      | cannot                 | be                  | computed.         |                    |                 |                |         |                |            |   |        |        |      |    |   |              |
| System    | mass<br>G                                              | =<br>=                 | 99.5<br>-1570851.74                                                         | (gm)<br>(J)            | density<br>H        | =<br>=            | 2.2<br>-1314751.46 | (gm/cc)<br>(J)  | S              | =       | 234.18         | (J/K)      | V | =      | 45.25  | (cc) | Cp | = | 125.27 (J/K) |
| Oxygen    | delta<br>G                                             | moles<br>=             | =<br>-1172.93                                                               | 0.00481077<br>(J)      | delta<br>H          | grams<br>=        | =<br>124.98        | 0.153939<br>(J) | S              | =       | 1.19           | (J/K)      | V | =      | 437.43 | (cc) | Cp | = | 0.17 (J/K)   |

\*\*\*\*\*\_\*\*\*\*\*

Model 828 Bokan

|            |                     |                        |                                                                          |                       |                    |                  |                    |                |                |          |              |               |             |              |                    |            |          |             |             |
|------------|---------------------|------------------------|--------------------------------------------------------------------------|-----------------------|--------------------|------------------|--------------------|----------------|----------------|----------|--------------|---------------|-------------|--------------|--------------------|------------|----------|-------------|-------------|
| Temp (oC)  | =                   | 815.47                 |                                                                          |                       |                    |                  |                    |                |                |          |              |               |             |              |                    |            |          |             |             |
| Constraint | Flags:              | fO2                    | path                                                                     | =                     | QFM                | Fractionate      | Solids             |                |                |          |              |               |             |              |                    |            |          |             |             |
| Liquid     | mass<br>G           | =<br>=                 | 28.25<br>-457725.11                                                      | (gm)<br>(J)           | density<br>H       | =<br>=           | 2.23<br>-379670.97 | (gm/cc)<br>(J) | viscosity<br>S | =<br>=   | 5.97<br>71.7 | (log<br>(J/K) | 10<br>V     | poise)<br>=  | (analysis<br>12.65 | in<br>(cc) | wt<br>Cp | %<br>=      | 38.06 (J/K) |
|            | SiO2<br>70.95       | TiO2<br>0.08           | Al2O3<br>11.69                                                           | Fe2O3<br>0.48         | Cr2O3<br>0         | FeO<br>1.45      | MnO<br>0.78        | MgO<br>0.21    | NiO<br>0       | CoO<br>0 | CaO<br>2.12  | Na2O<br>3.79  | K2O<br>3.92 | P2O5<br>0.74 | H2O<br>3.8         | CO2<br>0   | SO3<br>0 | Cl2O-1<br>0 | F2O-1<br>0  |
| opx        | mass<br>opx<br>G    | =<br><br>=             | 0.04<br>Na0.00Ca0.02Fe"1.13Mg0.79Fe""0.02Ti0.00Al0.08Si1.95O6<br>-470.91 | (gm)<br>(J)           | density<br>H       | =<br>=           | 3.6<br>-391.23     | (gm/cc)<br>(J) | (analysis<br>S | in<br>=  | mole<br>0.07 | %<br>(J/K)    |             | V<br>=       | 0.01               | (cc)       | Cp       | =           | 0.04 (J/K)  |
|            | diopside<br>-116.68 | clinoenstatit<br>97.99 | hedenbergite<br>113.18                                                   | alumino-buffo<br>3.02 | buffonite<br>-2.99 | essenite<br>5.35 | jadeite<br>0.11    |                |                |          |              |               |             |              |                    |            |          |             |             |
| feldspar   | mass                | =                      | 0.45                                                                     | (gm)                  | density            | =                | 2.59               | (gm/cc)        | (analysis      | in       | mole         | %)            |             |              |                    |            |          |             |             |

|           |                                          |       |                                                      |            |              |           |               |          |            |    |          |       |         |   |        |      |    |   |        |       |
|-----------|------------------------------------------|-------|------------------------------------------------------|------------|--------------|-----------|---------------|----------|------------|----|----------|-------|---------|---|--------|------|----|---|--------|-------|
|           | K0.05Na0.72Ca0.23Al1.23Si2.77O8          |       |                                                      |            |              |           |               |          |            |    |          |       |         |   |        |      |    |   |        |       |
|           | G                                        | =     | -7327.54                                             | (J)        | H            | =         | -6277.8       | (J)      | S          | =  | 0.96     | (J/K) | V       | = | 0.17   | (cc) | Cp | = | 0.54   | (J/K) |
|           | albite                                   |       | anorthite                                            |            | sanidine     |           |               |          |            |    |          |       |         |   |        |      |    |   |        |       |
|           | 71.95                                    |       | 22.96                                                |            | 5.09         |           |               |          |            |    |          |       |         |   |        |      |    |   |        |       |
| spinel    | mass                                     | =     | 0.03                                                 | (gm)       | density      | =         | 4.94          | (gm/cc)  | (analysis  | in | mole     | %)    |         |   |        |      |    |   |        |       |
|           | Fe"1.10Mg0.05Fe"1.60Al0.12Cr0.00Ti0.14O4 |       |                                                      |            |              |           |               |          |            |    |          |       |         |   |        |      |    |   |        |       |
|           | G                                        | =     | -190.84                                              | (J)        | H            | =         | -134.69       | (J)      | S          | =  | 0.05     | (J/K) | V       | = | 0.01   | (cc) | Cp | = | 0.03   | (J/K) |
|           | chromite                                 |       | hercynite                                            |            | magnetite    |           | spinel        |          | ulvospinel |    |          |       |         |   |        |      |    |   |        |       |
|           | 0                                        |       | 0.91                                                 |            | 79.76        |           | 4.85          |          | 14.48      |    |          |       |         |   |        |      |    |   |        |       |
| water     | mass                                     | =     | 1.93                                                 | (gm)       | density      | =         | 0.23          | (gm/cc)  |            |    |          |       |         |   |        |      |    |   |        |       |
|           | H2O                                      |       |                                                      |            |              |           |               |          |            |    |          |       |         |   |        |      |    |   |        |       |
|           | G                                        | =     | -43657.9                                             | (J)        | H            | =         | -23531.55     | (J)      | S          | =  | 18.49    | (J/K) | V       | = | 8.56   | (cc) | Cp | = | 6.75   | (J/K) |
| Total     | solids                                   | mass  | =                                                    | 2.44       | (gm)         | density   | =             | 0.28     | (gm/cc)    |    |          |       |         |   |        |      |    |   |        |       |
|           | G                                        | =     | -51647.19                                            | (J)        | H            | =         | -30335.27     | (J)      | S          | =  | 19.58    | (J/K) | V       | = | 8.75   | (cc) | Cp | = | 7.35   | (J/K) |
| Summary   | of                                       | all   | fractionated                                         | phases:    | (total       | mass      | =             | 68.82    | grams)     |    |          |       |         |   |        |      |    |   |        |       |
| opx       | mass                                     | =     | 6.73                                                 | (gm)       | density      | =         | 3.45          | (gm/cc)  | (analysis  | in | mole     | %)    |         |   |        |      |    |   |        |       |
|           | opx                                      |       | Na0.00Ca0.06Fe"0.74Mg1.14Fe"0.02Ti0.00Al0.10Si1.94O6 |            |              |           |               |          |            |    |          |       |         |   |        |      |    |   |        |       |
|           | G                                        | =     | -93599.06                                            | (J)        | H            | =         | -78816.05     | (J)      | S          | =  | 13.58    | (J/K) | V       | = | 1.95   | (cc) | Cp | = | 7.79   | (J/K) |
|           | diopside                                 |       | clinoenstatit                                        |            | hedenbergite |           | alumino-buffo |          | buffonite  |    | essenite |       | jadeite |   |        |      |    |   |        |       |
|           | -74.36                                   |       | 94.21                                                |            | 73.72        |           | 3.92          |          | -3.68      |    | 6.06     |       | 0.13    |   |        |      |    |   |        |       |
| cpx       | mass                                     | =     | 7.44                                                 | (gm)       | density      | =         | 3.32          | (gm/cc)  | (analysis  | in | mole     | %)    |         |   |        |      |    |   |        |       |
|           | cpx                                      |       | Na0.01Ca0.83Fe"0.24Mg0.75Fe"0.06Ti0.03Al0.24Si1.83O6 |            |              |           |               |          |            |    |          |       |         |   |        |      |    |   |        |       |
|           | G                                        | =     | -112160.55                                           | (J)        | H            | =         | -96022.91     | (J)      | S          | =  | 14.82    | (J/K) | V       | = | 2.24   | (cc) | Cp | = | 8.4    | (J/K) |
|           | diopside                                 |       | clinoenstatit                                        |            | hedenbergite |           | alumino-buffo |          | buffonite  |    | essenite |       | jadeite |   |        |      |    |   |        |       |
|           | 41.95                                    |       | 15.49                                                |            | 24.27        |           | 10.61         |          | -5.51      |    | 11.75    |       | 1.43    |   |        |      |    |   |        |       |
| feldspar  | mass                                     | =     | 49.48                                                | (gm)       | density      | =         | 2.67          | (gm/cc)  | (analysis  | in | mole     | %)    |         |   |        |      |    |   |        |       |
|           | K0.01Na0.35Ca0.64Al1.64Si2.36O8          |       |                                                      |            |              |           |               |          |            |    |          |       |         |   |        |      |    |   |        |       |
|           | G                                        | =     | -816062.32                                           | (J)        | H            | =         | -702615.82    | (J)      | S          | =  | 104.21   | (J/K) | V       | = | 18.56  | (cc) | Cp | = | 58.88  | (J/K) |
|           | albite                                   |       | anorthite                                            |            | sanidine     |           |               |          |            |    |          |       |         |   |        |      |    |   |        |       |
|           | 35.3                                     |       | 63.54                                                |            | 1.16         |           |               |          |            |    |          |       |         |   |        |      |    |   |        |       |
| spinel    | mass                                     | =     | 5.16                                                 | (gm)       | density      | =         | 4.8           | (gm/cc)  | (analysis  | in | mole     | %)    |         |   |        |      |    |   |        |       |
|           | Fe"1.11Mg0.15Fe"1.27Al0.21Cr0.00Ti0.26O4 |       |                                                      |            |              |           |               |          |            |    |          |       |         |   |        |      |    |   |        |       |
|           | G                                        | =     | -38504.66                                            | (J)        | H            | =         | -28037.04     | (J)      | S          | =  | 9.62     | (J/K) | V       | = | 1.07   | (cc) | Cp | = | 4.68   | (J/K) |
|           | chromite                                 |       | hercynite                                            |            | magnetite    |           | spinel        |          | ulvospinel |    |          |       |         |   |        |      |    |   |        |       |
|           | 0                                        |       | -4.36                                                |            | 63.66        |           | 15.03         |          | 25.67      |    |          |       |         |   |        |      |    |   |        |       |
| Viscosity | of                                       | the   | System                                               | cannot     | be           | computed. |               |          |            |    |          |       |         |   |        |      |    |   |        |       |
| System    | mass                                     | =     | 99.5                                                 | (gm)       | density      | =         | 2.2           | (gm/cc)  |            |    |          |       |         |   |        |      |    |   |        |       |
|           | G                                        | =     | -1569698.89                                          | (J)        | H            | =         | -1315498.05   | (J)      | S          | =  | 233.51   | (J/K) | V       | = | 45.23  | (cc) | Cp | = | 125.17 | (J/K) |
| Oxygen    | delta                                    | moles | =                                                    | 0.00483415 | delta        | grams     | =             | 0.154687 |            |    |          |       |         |   |        |      |    |   |        |       |
|           | G                                        | =     | -1172.67                                             | (J)        | H            | =         | 124.74        | (J)      | S          | =  | 1.19     | (J/K) | V       | = | 437.54 | (cc) | Cp | = | 0.17   | (J/K) |

\*\*\*\*\*\_\*\*\*\*\*
