# Supplementary material
Source: publisher figshare collection journal article supplement (https://tandf.figshare.com/articles/dataset/_/1466823)
Supplement: Supplementary file 2 [file 4]

**Supplementary File 1. Sample Locations****Drill Holes of Ucore Rare Metals**

| Sample | Drill Hole | Depth (meters) | Easting  | Northing  | Azimuth | Dip |
|--------|------------|----------------|----------|-----------|---------|-----|
| LM-90  | LM-08-22   | 36             | 683516.8 | 6089972.5 | 212     | 62  |
| LM-92  | LM-08-18   | 18.5           | 683550.5 | 6088952.4 | 212     | 75  |
| LM-113 | LM-08-34   | 44             | 683563.6 | 6089004.6 | 212     | 65  |

**Drill Holes of Standard Metals Corporation**

| Sample | Drill Hole | Depth (feet) |
|--------|------------|--------------|
| 752    | KS-121     | 92           |
| 757    | KS-121     | 141.5        |
| 758    | KS-121     | 202          |
| 772    | KS-53      | 23           |
| 774    | KS-53      | 43           |
| 776    | KS-53      | 51           |
| 777    | KS-53      | 63           |
| 778    | KS-53      | 78.9         |
| 779    | KS-53      | 88.9         |
| 780    | KS-53      | 110.8        |
| 781    | KS-53      | 119          |
| 782    | KS-53      | 126          |
| 783    | KS-53      | 180          |
| 795    | KS-90      | 619          |
| 797    | KS-90      | 669          |
| 800    | KS-50      | 52           |
| 801    | KS-50      | 89.4         |
| 803    | KS-50      | 262.2        |
| 804    | KS-50      | 286          |
| 805    | KS-50      | 314.5        |
| 806    | KS-50      | 344.8        |
| 807    | KS-50      | 175          |
| 808    | KS-50      | 181          |
| 809    | KS-50      | 185.5        |
| 810    | KS-50      | 189          |
| 811    | KS-50      | 192          |
| 812    | KS-50      | 223          |
| 815    | KS-44      | 18           |
| 816    | KS-44      | 47.3         |
| 824    | KS-44A     | 60           |
| 828    | KS-48      | 110          |

Drill holes KS-44, KS-44A, KS-45, KS-50, KS-53, KS-90 and KS-121 were drilled by Standard Metals Corporation in 1963-1964 in the vicinity of the Ross-Adams deposit (Fig. 1); the locations of the drill holes were reported by Thompson (1988) and Thompson et al. (1980); they were located within 200 m from the Ross Adams open pit.
