# Supplementary material
Source: publisher figshare collection journal article supplement (https://tandf.figshare.com/articles/dataset/_/1466823)
Supplement: Supplementary file 3 [file 4]

**Supplementary File 5.** Proportion (%) of crystallized minerals and their composition

| T(°C) | Opx | Mg# | Cpx | WoEnFs                                             | Feldspar | An               | Magnetite | Ti   |
|-------|-----|-----|-----|----------------------------------------------------|----------|------------------|-----------|------|
| 1080  |     |     |     |                                                    | 0.1      | An <sub>85</sub> |           |      |
| 1070  |     |     |     |                                                    | 1.3      | An <sub>85</sub> |           |      |
| 1060  |     |     |     |                                                    | 3.7      | An <sub>84</sub> |           |      |
| 1050  |     |     |     |                                                    | 6.0      | An <sub>84</sub> |           |      |
| 1040  |     |     | 0.2 | Wo <sub>45</sub> En <sub>40</sub> Fs <sub>15</sub> | 8.1      | An <sub>83</sub> |           |      |
| 1030  |     |     | 2.1 | Wo <sub>45</sub> En <sub>40</sub> Fs <sub>15</sub> | 9.7      | An <sub>82</sub> |           |      |
| 1020  |     |     | 3.7 | Wo <sub>44</sub> En <sub>40</sub> Fs <sub>16</sub> | 11.1     | An <sub>81</sub> |           |      |
| 1010  |     |     | 5.3 | Wo <sub>43</sub> En <sub>40</sub> Fs <sub>17</sub> | 13.2     | An <sub>79</sub> |           |      |
| 1000  |     |     | 6.8 | Wo <sub>42</sub> En <sub>40</sub> Fs <sub>18</sub> | 15.4     | An <sub>76</sub> | 0.2       | 30.7 |
| 990   | 0.6 | 67  | 7.4 |                                                    | 18.6     | An <sub>73</sub> | 1.0       | 29.6 |
| 980   | 1.7 | 65  | 7.4 |                                                    | 22.1     | An <sub>70</sub> | 1.6       | 28.6 |
| 970   | 2.5 | 64  | 7.4 |                                                    | 25.1     | An <sub>67</sub> | 2.2       | 27.5 |
| 960   | 3.3 | 63  | 7.4 |                                                    | 27.8     | An <sub>64</sub> | 2.7       | 26.4 |
| 950   | 3.8 | 61  | 7.4 |                                                    | 30.2     | An <sub>61</sub> | 3.0       | 25.3 |
| 940   | 4.3 | 60  | 7.4 |                                                    | 32.3     | An <sub>57</sub> | 3.4       | 24.2 |
| 930   | 4.7 | 58  | 7.4 |                                                    | 34.3     | An <sub>54</sub> | 3.7       | 23.2 |
| 920   | 5.1 | 57  | 7.4 |                                                    | 36.1     | An <sub>51</sub> | 3.9       | 22.1 |
| 910   | 5.4 | 55  | 7.4 |                                                    | 37.8     | An <sub>48</sub> | 4.1       | 21.1 |
| 900   | 5.6 | 54  | 7.4 |                                                    | 39.4     | An <sub>45</sub> | 4.3       | 20.2 |
| 890   | 5.8 | 52  | 7.4 |                                                    | 40.9     | An <sub>42</sub> | 4.5       | 19.3 |
| 880   | 6.0 | 51  | 7.4 |                                                    | 42.3     | An <sub>39</sub> | 4.6       | 18.5 |
| 870   | 6.2 | 49  | 7.4 |                                                    | 43.6     | An <sub>36</sub> | 4.7       | 17.7 |
| 860   | 6.3 | 48  | 7.4 |                                                    | 44.8     | An <sub>33</sub> | 4.8       | 16.9 |
| 850   | 6.4 | 46  | 7.4 |                                                    | 46.0     | An <sub>30</sub> | 4.9       | 16.3 |
| 840   | 6.5 | 45  | 7.4 |                                                    | 47.1     | An <sub>28</sub> | 5.0       | 15.7 |
| 830   | 6.6 | 43  | 7.4 |                                                    | 48.1     | An <sub>26</sub> | 5.1       | 15.2 |
| 820   | 6.7 | 42  | 7.4 |                                                    | 49.0     | An <sub>24</sub> | 5.1       | 14.7 |
| 815*  | 6.7 | 41  | 7.4 |                                                    | 49.5     | An <sub>23</sub> | 5.2       | 14.5 |

\*Final model temperature. Mg# = (Mg/Mg+Fe)\*100. Wo = wollastonite component, En = enstatite component, Fs = ferrosilite component. An = anorthite component, Ti = the TiO<sub>2</sub> content of the magnetite.
