# Supplementary material
Source: publisher figshare collection journal article supplement (https://tandf.figshare.com/articles/dataset/_/1466823)
Supplement: Supplementary file 4 [file 4]

**Supplementary File 4.** Compositions and conditions of the syn-plutonic lamprophyric dykes used in the model

| Sample                          | 828   | 828<br>(model) |
|---------------------------------|-------|----------------|
| SiO <sub>2</sub> (wt%)          | 54.90 | 53.26          |
| TiO <sub>2</sub>                | 0.60  | 0.58           |
| Al <sub>2</sub> O <sub>3</sub>  | 19.96 | 19.36          |
| Fe <sub>2</sub> O <sub>3t</sub> | 7.97  | 7.74           |
| MnO                             | 0.23  | 0.22           |
| MgO                             | 2.67  | 2.59           |
| CaO                             | 9.00  | 8.73           |
| Na <sub>2</sub> O               | 3.20  | 3.11           |
| K <sub>2</sub> O                | 1.24  | 1.21           |
| P <sub>2</sub> O <sub>5</sub>   | 0.22  | 0.21           |
| H <sub>2</sub> O                |       | 3%             |
| <i>f</i> O <sub>2</sub>         |       | FMQ 0          |
| Pressure<br>(GPa)               |       | 0.1            |

Major element data for models normalized to 100% including water.
