# Supplementary material
Source: publisher figshare collection journal article supplement (https://tandf.figshare.com/articles/dataset/_/1466823)
Supplement: Supplementary file 5 [file 4]

**Supplementary File 2b.** Major and trace element compositions of mafic (lamprophyric) dykes of the Bokan Mountain Complex

| Sample                                      | LM90  | LM92  | LM113 | 752   | 779    | 801    | 804   | 806    | 824   | 828   |
|---------------------------------------------|-------|-------|-------|-------|--------|--------|-------|--------|-------|-------|
| (wt%)                                       |       |       |       |       |        |        |       |        |       |       |
| SiO <sub>2</sub>                            | 55.75 | 50.29 | 56.16 | 47.62 | 48.66  | 51.38  | 52.21 | 50.81  | 48.64 | 52.12 |
| TiO <sub>2</sub>                            | 0.42  | 0.65  | 0.39  | 0.71  | 0.72   | 0.65   | 0.45  | 0.54   | 0.76  | 0.57  |
| Al <sub>2</sub> O <sub>3</sub>              | 18.17 | 17.15 | 17.58 | 17.65 | 19.93  | 19.05  | 16.56 | 17.22  | 18.30 | 18.95 |
| Fe <sub>2</sub> O <sub>3</sub> <sup>t</sup> | 5.15  | 8.26  | 4.79  | 10.31 | 9.11   | 8.85   | 6.52  | 6.32   | 9.92  | 7.57  |
| MnO                                         | 0.17  | 0.32  | 0.16  | 0.19  | 0.17   | 0.18   | 0.23  | 0.22   | 0.21  | 0.22  |
| MgO                                         | 1.42  | 2.46  | 1.18  | 3.85  | 4.08   | 3.25   | 1.75  | 1.77   | 4.21  | 2.53  |
| CaO                                         | 5.56  | 6.16  | 5.97  | 10.08 | 9.80   | 9.36   | 7.66  | 6.99   | 10.29 | 8.54  |
| Na <sub>2</sub> O                           | 5.31  | 6.07  | 6.88  | 2.65  | 3.32   | 3.46   | 5.11  | 5.80   | 3.10  | 3.04  |
| K <sub>2</sub> O                            | 1.94  | 2.14  | 0.92  | 1.01  | 1.00   | 1.08   | 2.15  | 3.25   | 0.74  | 1.18  |
| P <sub>2</sub> O <sub>5</sub>               | 0.24  | 0.31  | 0.21  | 0.71  | 0.19   | 0.21   | 0.29  | 0.34   | 0.21  | 0.21  |
| LOI                                         | 5.37  | 5.29  | 5.31  | 4.91  | 3.22   | 3.35   | 6.61  | 7.08   | 3.34  | 4.71  |
| Total                                       | 99.50 | 99.10 | 99.55 | 99.69 | 100.20 | 100.82 | 99.54 | 100.34 | 99.72 | 99.64 |
| (ppm)                                       |       |       |       |       |        |        |       |        |       |       |
| Rb                                          | 85    | 116   | 45    | 46    | 37     | 36     | 99    | 218    | 33    | 53    |
| Ba                                          | 1219  | 457   | 237   | 252   | 477    | 439    | 536   | 444    | 250   | 642   |
| Sr                                          | 781   | 708   | 12    | 738   | 783    | 838    | 621   | 903    | 813   | 841   |
| Ga                                          | 17    | 18    | 18    | 18    | 17     | 19     | 19    | 16     | 18    | 19    |
| Ta                                          | 0.32  | 0.32  | 0.49  | 0.00  | 0.00   | 0.20   | 0.30  | 0.20   | 0.10  | 1.00  |
| Nb                                          | 4.5   | 4.3   | 12.4  | 2.0   | 2.0    | 5.0    | 8.0   | 5.0    | 3.0   | 4.0   |
| Hf                                          | 2.5   | 2.2   | 2.8   | 1.4   | 1.6    | 1.8    | 2.8   | 2.8    | 1.6   | 2.4   |
| Zr                                          | 85    | 81    | 96    | 48    | 52     | 62     | 97    | 102    | 53    | 67    |
| Y                                           | 20    | 34    | 23    | 16    | 16     | 25     | 38    | 30     | 27    | 556   |
| Th                                          | 2.51  | 1.94  | 8.98  | 5.80  | 1.20   | 3.70   | 2.60  | 2.70   | 1.50  | 1.90  |
| U                                           | 0.98  | 6.96  | 2.12  | 1.70  | 0.50   | 0.80   | 2.60  | 2.00   | 0.70  | 1.50  |
| La                                          | 11.7  | 14.1  | 15.3  | 9.2   | 8.9    | 11.1   | 18.2  | 17.7   | 9.8   | 13.6  |
| Ce                                          | 25.4  | 31.1  | 33.3  | 20.8  | 20.6   | 25.6   | 40.5  | 40.4   | 23.0  | 29.0  |
| Pr                                          | 3.61  | 4.25  | 4.53  | 2.88  | 2.90   | 3.31   | 4.91  | 4.96   | 2.97  | 4.31  |
| Nd                                          | 17.7  | 19.0  | 21.4  | 13.3  | 13.5   | 15.2   | 21.6  | 22.0   | 14.1  | 21.2  |
| Sm                                          | 4.19  | 4.57  | 4.82  | 3.30  | 3.30   | 3.70   | 4.60  | 5.20   | 3.50  | 10.90 |
| Eu                                          | 1.35  | 1.44  | 1.54  | 1.18  | 1.18   | 1.21   | 1.37  | 1.57   | 1.17  | 2.64  |
| Gd                                          | 3.89  | 4.44  | 4.67  | 3.40  | 3.40   | 3.60   | 4.30  | 4.70   | 3.40  | 29.60 |
| Tb                                          | 0.64  | 0.80  | 0.78  | 0.60  | 0.60   | 0.60   | 0.70  | 0.80   | 0.60  | 8.40  |
| Dy                                          | 3.76  | 5.05  | 4.70  | 3.20  | 3.20   | 3.50   | 4.80  | 4.50   | 3.60  | 65.00 |
| Ho                                          | 0.80  | 1.13  | 0.99  | 0.70  | 0.60   | 0.70   | 1.00  | 0.90   | 0.80  | 14.70 |
| Er                                          | 2.36  | 3.29  | 2.87  | 1.90  | 1.80   | 2.00   | 3.20  | 2.70   | 2.10  | 39.30 |
| Tm                                          | 0.37  | 0.47  | 0.46  | 0.29  | 0.27   | 0.29   | 0.52  | 0.40   | 0.33  | 4.72  |
| Yb                                          | 2.43  | 3.38  | 2.89  | 1.90  | 1.90   | 1.90   | 3.50  | 2.60   | 2.00  | 20.10 |
| Lu                                          | 0.36  | 0.50  | 0.43  | 0.31  | 0.30   | 0.30   | 0.50  | 0.39   | 0.30  | 2.00  |

Fe<sub>2</sub>O<sub>3t</sub> - total iron as Fe<sub>2</sub>O<sub>3</sub>; LOI - loss on ignition.
