# Supplementary material
Source: publisher figshare collection journal article supplement (https://tandf.figshare.com/articles/dataset/_/1466823)
Supplement: Supplementary file 6 [file 4]

**Supplementary File 3.** Nd isotopic composition of lamprophyric rocks of the Bokan Mountain Complex

| Sample | Nd<br>(ppm) | Sm<br>(ppm) | $\frac{^{147}\text{Sm}}{^{144}\text{Nd}}$ | $\frac{^{143}\text{Nd}}{^{144}\text{Nd}}$ | $\pm$<br>2 $\sigma$ | $\epsilon_{\text{Nd}}$<br>(177Ma) | $T_{\text{DMI}}$<br>(Ma) | $T_{\text{DM2}}$<br>(Ma) |
|--------|-------------|-------------|-------------------------------------------|-------------------------------------------|---------------------|-----------------------------------|--------------------------|--------------------------|
| LM 113 | 17.43       | 3.869       | 0.1342                                    | 0.512903                                  | 6                   | +6.6                              | 305                      | 474                      |
| LM 92  | 18.36       | 4.367       | 0.1458                                    | 0.512911                                  | 5                   | +6.5                              | 329                      | 537                      |

Concentrations of Nd and Sm were determined by isotope dilution mass spectrometer.  $^{143}\text{Nd}/^{144}\text{Nd}$  are measured Nd isotopic ratios. The  $\epsilon_{\text{Nd}}$  values were calculated assuming an age of 177 Ma. Nd model ages were calculated based upon DePaolo's (1988) depleted mantle model ( $T_{\text{DM1}}$ ) and on a depleted mantle model ( $T_{\text{DM2}}$ ) separated from the CHUR (chondrite-uniform reservoir) at 4.55 Ga with linear evolution and a present-day epsilon value of +10. 2 $\sigma$  -analytical uncertainties given at 2 $\sigma$  level correspond to the last decimal of the reported ratios.
