# Supplementary material
Source: publisher figshare collection journal article supplement (https://tandf.figshare.com/articles/dataset/_/1466823)
Supplement: Supplementary file 7 [file 4]

**Supplementary File 2a.** Major and trace element compositions of granitic rocks of the Bokan Mountain Complex

| Sample                                      | 757    | 758    | 772    | 774    | 776    | 777    | 778    | 780    | 781    | 782    | 783    | 795    |
|---------------------------------------------|--------|--------|--------|--------|--------|--------|--------|--------|--------|--------|--------|--------|
| (wt%)                                       |        |        |        |        |        |        |        |        |        |        |        |        |
| SiO <sub>2</sub>                            | 73.86  | 72.74  | 73.76  | 75.32  | 74.40  | 73.90  | 73.90  | 74.16  | 74.96  | 73.56  | 75.58  | 72.72  |
| TiO <sub>2</sub>                            | 0.13   | 0.12   | 0.12   | 0.20   | 0.16   | 0.19   | 0.15   | 0.19   | 0.12   | 0.16   | 0.15   | 0.10   |
| Al <sub>2</sub> O <sub>3</sub>              | 11.46  | 11.11  | 11.79  | 8.61   | 11.05  | 10.91  | 11.21  | 11.26  | 11.13  | 11.23  | 11.22  | 11.37  |
| Fe <sub>2</sub> O <sub>3</sub> <sup>t</sup> | 4.30   | 6.30   | 4.01   | 7.38   | 4.69   | 4.90   | 4.66   | 4.58   | 4.04   | 4.91   | 4.28   | 6.50   |
| MnO                                         | 0.11   | 0.06   | 0.08   | 0.09   | 0.09   | 0.05   | 0.08   | 0.07   | 0.12   | 0.15   | 0.11   | 0.54   |
| MgO                                         | 0.02   | 0.03   | 0.03   | 0.01   | 0.05   | 0.01   | 0.02   | 0.02   | 0.02   | 0.03   | 0.02   | 0.01   |
| CaO                                         | 0.35   | 0.63   | 0.42   | 0.19   | 0.40   | 0.39   | 0.36   | 0.31   | 0.29   | 0.31   | 0.36   | 0.47   |
| Na <sub>2</sub> O                           | 5.58   | 5.40   | 5.51   | 5.13   | 5.28   | 5.38   | 5.24   | 6.22   | 5.61   | 5.59   | 3.96   | 4.39   |
| K <sub>2</sub> O                            | 4.17   | 3.60   | 4.27   | 3.06   | 3.87   | 4.26   | 4.35   | 3.18   | 3.70   | 4.05   | 4.30   | 3.89   |
| P <sub>2</sub> O <sub>5</sub>               | 0.01   | 0.01   | 0.01   | 0.01   | 0.01   | 0.01   | 0.01   | 0.01   | 0.01   | 0.01   | 0.01   | 0.01   |
| LOI                                         | 0.35   | 1.49   | 0.41   | 0.09   | 0.47   | 0.30   | 0.33   | 0.30   | 0.33   | 0.32   | 1.10   | 2.22   |
| Total                                       | 100.35 | 101.49 | 100.41 | 100.09 | 100.47 | 100.30 | 100.33 | 100.30 | 100.33 | 100.32 | 101.10 | 102.22 |
| (ppm)                                       |        |        |        |        |        |        |        |        |        |        |        |        |
| Cr                                          | 60     | 10     | 71     | 92     | 71     | 10     | 61     | 70     | 10     | 70     | 10     | 72     |
| Rb                                          | 246    | 182    | 198    | 140    | 194    | 235    | 251    | 238    | 270    | 284    | 225    | 148    |
| Ba                                          | 101    | 66     | 40     | 51     | 38     | 17     | 25     | 51     | 15     | 114    | 64     | 81     |
| Sr                                          | 19     | 6      | 18     | 6      | 25     | 21     | 8      | 8      | 4      | 9      | 110    | 19     |
| Ga                                          | 38     | 40     | 43     | 33     | 40     | 38     | 35     | 40     | 39     | 38     | 42     | 45     |
| Ta                                          | 1.40   | 2.74   | 7.70   | 3.87   | 7.10   | 5.91   | 2.84   | 6.81   | 2.75   | 4.83   | 2.46   | 2.26   |
| Nb                                          | 24.0   | 69.0   | 151.0  | 53.9   | 82.2   | 88.7   | 33.4   | 93.1   | 37.7   | 75.5   | 53.3   | 31.8   |
| Hf                                          | 11.18  | 12.07  | 28.37  | 25.95  | 87.74  | 23.75  | 57.71  | 18.52  | 48.30  | 21.14  | 11.27  | 13.33  |
| Zr                                          | 480    | 407    | 1193   | 976    | 3819   | 981    | 2893   | 576    | 2154   | 873    | 353    | 542    |
| Y                                           | 140    | 255    | 468    | 122    | 405    | 260    | 308    | 307    | 111    | 444    | 746    | 121    |
| Th                                          | 23.66  | 32.57  | 51.58  | 145.51 | 54.47  | 51.06  | 27.84  | 63.88  | 52.17  | 63.22  | 136.3  | 12.61  |
| U                                           | 7.49   | 11.46  | 24.72  | 12.41  | 29.11  | 19.06  | 12.05  | 21.53  | 25.27  | 47.82  | 16.91  | 7.07   |
| La                                          | 56.20  | 102.5  | 104.4  | 131.3  | 164.3  | 113.1  | 85.76  | 97.22  | 90.18  | 111.8  | 219.3  | 97.10  |
| Ce                                          | 109.8  | 209.0  | 231.0  | 285.9  | 348.9  | 254.8  | 179.2  | 210.3  | 184.4  | 238.6  | 476.5  | 209.2  |
| Pr                                          | 12.18  | 24.25  | 27.26  | 32.77  | 43.01  | 31.70  | 21.36  | 24.73  | 20.28  | 28.99  | 61.69  | 23.17  |
| Nd                                          | 44.32  | 93.44  | 105.4  | 130.2  | 171.4  | 122.3  | 82.62  | 92.61  | 70.10  | 112.8  | 250.1  | 93.00  |
| Sm                                          | 9.28   | 23.03  | 29.39  | 29.51  | 45.34  | 29.76  | 21.36  | 23.63  | 12.64  | 33.93  | 70.30  | 22.04  |
| Eu                                          | 0.95   | 2.36   | 3.16   | 2.68   | 4.70   | 3.11   | 2.39   | 2.48   | 1.10   | 3.97   | 7.47   | 1.93   |
| Gd                                          | 10.68  | 25.77  | 36.99  | 25.95  | 51.53  | 34.55  | 27.74  | 30.44  | 10.60  | 49.43  | 86.39  | 19.28  |
| Tb                                          | 2.60   | 5.38   | 8.71   | 4.88   | 10.55  | 7.24   | 6.48   | 6.51   | 2.04   | 11.78  | 18.96  | 3.38   |
| Dy                                          | 18.97  | 33.78  | 61.71  | 30.53  | 67.86  | 46.27  | 45.46  | 43.05  | 13.96  | 78.53  | 125.03 | 20.30  |
| Ho                                          | 4.59   | 7.00   | 14.39  | 6.31   | 14.40  | 9.68   | 11.14  | 9.31   | 3.57   | 17.01  | 25.93  | 4.31   |
| Er                                          | 15.37  | 19.38  | 45.70  | 20.05  | 40.78  | 27.62  | 38.98  | 28.73  | 16.30  | 51.24  | 72.56  | 13.43  |
| Tm                                          | 2.73   | 2.79   | 7.26   | 3.69   | 5.77   | 4.08   | 7.33   | 4.88   | 4.94   | 8.60   | 9.75   | 2.19   |
| Yb                                          | 19.57  | 17.65  | 44.99  | 28.19  | 34.18  | 26.91  | 50.53  | 36.54  | 56.86  | 59.60  | 53.19  | 14.15  |
| Lu                                          | 3.41   | 2.87   | 6.50   | 4.47   | 5.16   | 4.58   | 7.93   | 6.07   | 11.41  | 8.86   | 7.24   | 2.02   |
| A/CNK                                       | 0.80   | 0.80   | 0.82   | 0.74   | 0.81   | 0.77   | 0.8    | 0.79   | 0.81   | 0.79   | 0.95   | 0.93   |
| A/NK                                        | 0.84   | 0.87   | 0.86   | 0.73   | 0.86   | 0.81   | 0.84   | 0.82   | 0.84   | 0.83   | 1.00   | 1.00   |

A/CNK = molar Al<sub>2</sub>O<sub>3</sub>/(CaO+Na<sub>2</sub>O+K<sub>2</sub>O); A/NK = molar Al<sub>2</sub>O<sub>3</sub>/(Na<sub>2</sub>O+K<sub>2</sub>O); Fe<sub>2</sub>O<sub>3</sub><sup>t</sup> - total iron as Fe<sub>2</sub>O<sub>3</sub>; LOI - loss on ignition.

**Supplementary File 2a cont.**

| Sample                                      | 797    | 800    | 803    | 805    | 807    | 808    | 809    | 810    | 811    | 812    | 815    | 816    |
|---------------------------------------------|--------|--------|--------|--------|--------|--------|--------|--------|--------|--------|--------|--------|
| (wt%)                                       |        |        |        |        |        |        |        |        |        |        |        |        |
| SiO <sub>2</sub>                            | 76.86  | 74.70  | 75.34  | 74.72  | 73.73  | 75.98  | 74.16  | 73.93  | 74.58  | 74.68  | 74.27  | 74.68  |
| TiO <sub>2</sub>                            | 0.10   | 0.16   | 0.14   | 0.15   | 0.15   | 0.17   | 0.17   | 0.18   | 0.16   | 0.17   | 0.19   | 0.13   |
| Al <sub>2</sub> O <sub>3</sub>              | 9.85   | 11.00  | 11.08  | 11.13  | 11.39  | 11.36  | 11.45  | 11.32  | 10.85  | 11.20  | 8.78   | 10.91  |
| Fe <sub>2</sub> O <sub>3</sub> <sup>t</sup> | 4.84   | 4.39   | 3.78   | 4.13   | 4.65   | 3.70   | 4.36   | 4.43   | 4.67   | 4.17   | 8.08   | 4.43   |
| MnO                                         | 0.07   | 0.13   | 0.10   | 0.02   | 0.14   | 0.11   | 0.05   | 0.03   | 0.05   | 0.03   | 0.15   | 0.11   |
| MgO                                         | 0.02   | 0.02   | 0.03   | 0.03   | 0.02   | 0.02   | 0.05   | 0.03   | 0.03   | 0.02   | 0.01   | 0.02   |
| CaO                                         | 0.21   | 0.36   | 0.30   | 0.34   | 0.28   | 0.43   | 0.35   | 0.44   | 0.43   | 0.31   | 0.29   | 0.45   |
| Na <sub>2</sub> O                           | 4.48   | 5.13   | 5.02   | 5.28   | 5.38   | 3.94   | 5.32   | 5.33   | 5.18   | 5.30   | 5.30   | 4.96   |
| K <sub>2</sub> O                            | 3.57   | 4.11   | 4.18   | 4.19   | 4.25   | 4.27   | 4.06   | 4.30   | 4.03   | 4.12   | 2.92   | 4.29   |
| P <sub>2</sub> O <sub>5</sub>               | 0.01   | 0.01   | 0.02   | 0.01   | 0.01   | 0.01   | 0.02   | 0.01   | 0.01   | 0.01   | 0.01   | 0.01   |
| LOI                                         | 0.37   | 0.34   | 0.29   | 0.27   | 0.50   | 1.43   | 0.49   | 0.76   | 0.42   | 0.30   | 0.12   | 0.40   |
| Total                                       | 100.37 | 100.34 | 100.29 | 100.27 | 100.50 | 101.43 | 100.49 | 100.76 | 100.42 | 100.30 | 100.12 | 100.40 |
| (ppm)                                       |        |        |        |        |        |        |        |        |        |        |        |        |
| Cr                                          | 90     | 10     | 61     | 80     | 80     | 10     | 71     | 10     | 91     | 10     | 71     | 10     |
| Rb                                          | 147    | 214    | 221    | 227    | 251    | 172    | 217    | 222    | 209    | 204    | 125    | 217    |
| Ba                                          | 16     | 28     | 25     | 26     | 46     | 43     | 35     | 30     | 34     | 25     | 47     | 50     |
| Sr                                          | 9      | 31     | 7      | 20     | 10     | 61     | 13     | 10     | 7      | 14     | 12     | 34     |
| Ga                                          | 38     | 40     | 39     | 39     | 41     | 40     | 40     | 40     | 38     | 42     | 38     | 39     |
| Ta                                          | 2.00   | 5.19   | 4.67   | 8.22   | 2.91   | 10.82  | 7.56   | 4.92   | 5.28   | 7.86   | 2.43   | 6.55   |
| Nb                                          | 30.0   | 93.7   | 50.7   | 97.3   | 63.2   | 261.8  | 175.4  | 121.0  | 83.3   | 108.2  | 38.4   | 93.7   |
| Hf                                          | 20.38  | 31.81  | 63.81  | 76.52  | 20.66  | 38.72  | 26.91  | 55.48  | 100.73 | 78.82  | 22.55  | 20.55  |
| Zr                                          | 800    | 1226   | 3210   | 3166   | 735    | 1709   | 1122   | 2234   | 4178   | 3270   | 918    | 851    |
| Y                                           | 48     | 249    | 198    | 139    | 694    | 567    | 396    | 2356   | 470    | 207    | 94     | 273    |
| Th                                          | 14.49  | 53.25  | 48.79  | 37.01  | 219.7  | 247.7  | 212.7  | 270.8  | 65.80  | 75.35  | 12.24  | 34.25  |
| U                                           | 5.79   | 16.55  | 25.46  | 26.18  | 17.45  | 40.64  | 22.88  | 26.15  | 26.71  | 35.22  | 7.79   | 20.15  |
| La                                          | 26.58  | 126.6  | 103.5  | 151.4  | 150.5  | 159.7  | 150.2  | 186.7  | 84.89  | 198.1  | 40.45  | 225.6  |
| Ce                                          | 61.34  | 295.2  | 236.4  | 326.9  | 349.1  | 382.1  | 354.8  | 445.1  | 197.0  | 461.5  | 97.79  | 504.7  |
| Pr                                          | 6.89   | 33.71  | 26.27  | 36.61  | 39.72  | 43.17  | 41.73  | 52.20  | 22.03  | 53.71  | 11.73  | 56.21  |
| Nd                                          | 27.37  | 134.6  | 103.5  | 143.4  | 159.5  | 169.8  | 168.3  | 219.5  | 89.76  | 210.3  | 49.95  | 220.6  |
| Sm                                          | 7.49   | 35.40  | 29.62  | 30.99  | 52.76  | 51.46  | 46.07  | 72.30  | 25.18  | 49.72  | 13.65  | 49.56  |
| Eu                                          | 0.75   | 3.52   | 3.15   | 2.81   | 6.16   | 5.39   | 4.60   | 8.83   | 2.69   | 4.38   | 1.36   | 4.38   |
| Gd                                          | 7.09   | 34.50  | 32.66  | 25.87  | 70.82  | 57.83  | 43.85  | 111.8  | 28.74  | 37.47  | 14.16  | 41.10  |
| Tb                                          | 1.20   | 6.88   | 6.59   | 4.41   | 18.36  | 14.66  | 10.38  | 31.18  | 7.51   | 7.35   | 2.73   | 7.45   |
| Dy                                          | 7.69   | 44.28  | 43.21  | 26.98  | 132.41 | 109.18 | 76.81  | 256.40 | 60.01  | 49.62  | 16.79  | 45.73  |
| Ho                                          | 1.70   | 9.37   | 9.03   | 5.62   | 29.09  | 25.17  | 17.64  | 66.15  | 15.54  | 11.23  | 3.54   | 9.37   |
| Er                                          | 5.99   | 27.82  | 27.69  | 17.95  | 84.16  | 77.84  | 54.83  | 213.3  | 53.61  | 37.57  | 11.63  | 26.49  |
| Tm                                          | 1.29   | 4.31   | 4.72   | 3.17   | 12.04  | 11.93  | 8.26   | 30.67  | 9.05   | 6.51   | 2.39   | 3.89   |
| Yb                                          | 11.59  | 25.93  | 32.26  | 21.76  | 66.51  | 72.08  | 50.30  | 159.99 | 55.44  | 43.50  | 19.52  | 23.47  |
| Lu                                          | 1.96   | 3.56   | 4.49   | 3.24   | 8.18   | 9.16   | 6.61   | 18.15  | 7.21   | 6.11   | 3.32   | 3.14   |
|                                             | 0.85   | 0.81   | 0.83   | 0.80   | 0.82   | 0.96   | 0.83   | 0.80   | 0.79   | 0.82   | 0.71   | 0.80   |
|                                             | 0.88   | 0.85   | 0.87   | 0.84   | 0.85   | 1.02   | 0.87   | 0.84   | 0.84   | 0.85   | 0.74   | 0.85   |

A/CNK = molar Al<sub>2</sub>O<sub>3</sub>/(CaO+Na<sub>2</sub>O+K<sub>2</sub>O); A/NK = molar Al<sub>2</sub>O<sub>3</sub>/(Na<sub>2</sub>O+K<sub>2</sub>O); Fe<sub>2</sub>O<sub>3</sub><sup>t</sup> - total iron as Fe<sub>2</sub>O<sub>3</sub>; LOI - loss on ignition.
